# Supplementary material for: Unveiling the Brazilian Kefir Microbiome: Discovery of a novel Lactobacillus kefiranofaciens (LkefirU) genome and in silico prospection of bioactive peptides with potential anti-Alzheimer properties
Source: Research Square preprint supplement (doi:10.21203/rs.3.rs-4014898/v1), 2024-04-11
Supplement: Supplementary file 1 [file 4b3c4010d3e3a1d25bbf1069.docx]

Supplementary table 1- Scaffold size

Scaffold size

NODE_1_length_234839_cov_952.177482 234839

NODE_2_length_187160_cov_1059.171251 187160

NODE_3_length_174507_cov_7.674845 174507

NODE_4_length_157804_cov_8.561221 157804

NODE_5_length_156225_cov_6.209169 156225

NODE_6_length_129384_cov_1053.020746 129384

NODE_7_length_112993_cov_7.011812 112993

NODE_8_length_106271_cov_6.981735 106271

NODE_9_length_93897_cov_1002.002451 93897

NODE_10_length_91417_cov_938.720267 91417

NODE_11_length_87636_cov_7.617463 87636

NODE_12_length_85171_cov_905.444476 85171

NODE_13_length_75661_cov_8.556966 75661

NODE_14_length_74571_cov_21.751946 74571

NODE_15_length_69861_cov_4.314386 69861

NODE_16_length_69461_cov_1151.420454 69461

NODE_17_length_67657_cov_1199.057883 67657

NODE_18_length_67045_cov_249.031587 67045

NODE_19_length_66383_cov_6.931356 66383

NODE_20_length_66119_cov_916.437909 66119

NODE_21_length_62454_cov_6.033847 62454

NODE_22_length_62254_cov_920.900931 62254

NODE_23_length_58913_cov_960.082215 58913

NODE_24_length_55495_cov_3.728716 55495

NODE_25_length_55453_cov_7.283656 55453

NODE_26_length_55132_cov_1215.470832 55132

NODE_27_length_55031_cov_6.741851 55031

NODE_28_length_54842_cov_8.045869 54842

NODE_29_length_53852_cov_8.633418 53852

NODE_30_length_52748_cov_896.331088 52748

NODE_31_length_51529_cov_23.413451 51529

NODE_32_length_49116_cov_24.037321 49116

NODE_33_length_47266_cov_1001.852132 47266

NODE_34_length_46825_cov_6.641779 46825

NODE_35_length_45504_cov_3.421637 45504

NODE_36_length_43505_cov_4.300138 43505

NODE_37_length_43123_cov_7.051709 43123

NODE_38_length_42668_cov_1721.085138 42668

NODE_39_length_41468_cov_1075.303769 41468

NODE_40_length_40936_cov_4.102664 40936

NODE_41_length_40234_cov_7.297618 40234

NODE_42_length_40167_cov_8.593039 40167

NODE_43_length_39069_cov_4.444071 39069

NODE_44_length_38919_cov_5.980265 38919

NODE_45_length_38701_cov_7.004321 38701

NODE_46_length_38150_cov_6.976664 38150

NODE_47_length_38130_cov_943.070177 38130

NODE_48_length_38073_cov_1235.924246 38073

NODE_49_length_36799_cov_6.721914 36799

NODE_50_length_36606_cov_6.941698 36606

NODE_51_length_34740_cov_1155.210610 34740

NODE_52_length_34733_cov_1055.588010 34733

NODE_53_length_34108_cov_3.965084 34108

NODE_54_length_33638_cov_7.905845 33638

NODE_55_length_33527_cov_1274.909566 33527

NODE_56_length_33510_cov_6.410312 33510

NODE_57_length_33277_cov_4.234423 33277

NODE_58_length_33261_cov_3.620249 33261

NODE_59_length_33137_cov_8.184390 33137

NODE_60_length_32933_cov_53.358659 32933

NODE_61_length_32012_cov_7.688582 32012

NODE_62_length_31828_cov_6.866679 31828

NODE_63_length_31089_cov_30.134723 31089

NODE_64_length_30916_cov_1002.446486 30916

NODE_65_length_30755_cov_30.239544 30755

NODE_66_length_30551_cov_37.007542 30551

NODE_67_length_30491_cov_1217.748817 30491

NODE_68_length_30203_cov_3.589293 30203

NODE_69_length_29753_cov_8.919894 29753

NODE_70_length_29630_cov_11.035638 29630

NODE_71_length_29154_cov_22.082855 29154

NODE_72_length_28997_cov_6.123005 28997

NODE_73_length_28822_cov_4.083151 28822

NODE_74_length_28333_cov_34.707476 28333

NODE_75_length_28243_cov_3.112175 28243

NODE_76_length_28158_cov_34.712806 28158

NODE_77_length_27952_cov_1289.921820 27952

NODE_78_length_27735_cov_6.080275 27735

NODE_79_length_27659_cov_6.865454 27659

NODE_80_length_27613_cov_3.559837 27613

NODE_81_length_27442_cov_3.814401 27442

NODE_82_length_27306_cov_34.973689 27306

NODE_83_length_27305_cov_26.809651 27305

NODE_84_length_27285_cov_1249.630371 27285

NODE_85_length_26802_cov_7.787677 26802

NODE_86_length_26736_cov_3.772497 26736

NODE_87_length_26707_cov_6.526339 26707

NODE_88_length_26689_cov_29.644252 26689

NODE_89_length_26546_cov_2.854970 26546

NODE_90_length_26323_cov_6.865959 26323

NODE_91_length_25887_cov_3.772840 25887

NODE_92_length_25868_cov_36.322202 25868

NODE_93_length_25838_cov_2.996548 25838

NODE_94_length_25353_cov_70.352953 25353

NODE_95_length_25088_cov_3.780450 25088

NODE_96_length_25069_cov_953.154553 25069

NODE_97_length_25022_cov_1150.579044 25022

NODE_98_length_24922_cov_3.739977 24922

NODE_99_length_24880_cov_2.903686 24880

NODE_100_length_24686_cov_1241.995087 24686

NODE_101_length_24576_cov_27.335549 24576

NODE_102_length_24520_cov_7.480523 24520

NODE_103_length_24381_cov_1149.168338 24381

NODE_104_length_24187_cov_1168.739019 24187

NODE_105_length_23712_cov_31.218667 23712

NODE_106_length_23399_cov_25.533285 23399

NODE_107_length_23261_cov_1363.310782 23261

NODE_108_length_22976_cov_4.183762 22976

NODE_109_length_22528_cov_2.921372 22528

NODE_110_length_22215_cov_7.442915 22215

NODE_111_length_22076_cov_7.635393 22076

NODE_112_length_21839_cov_4.312661 21839

NODE_113_length_21758_cov_3.301249 21758

NODE_114_length_21543_cov_3.090236 21543

NODE_115_length_21466_cov_26.281771 21466

NODE_116_length_21364_cov_7.743958 21364

NODE_117_length_21320_cov_27.124853 21320

NODE_118_length_21300_cov_3.595293 21300

NODE_119_length_21171_cov_3.371614 21171

NODE_120_length_21140_cov_20.651364 21140

NODE_121_length_21087_cov_3.213532 21087

NODE_122_length_21051_cov_80.123262 21051

NODE_123_length_20865_cov_3.795963 20865

NODE_124_length_20859_cov_7.617622 20859

NODE_125_length_20783_cov_271.150473 20783

NODE_126_length_20695_cov_1046.096463 20695

NODE_127_length_20615_cov_2.884339 20615

NODE_128_length_20402_cov_7.039564 20402

NODE_129_length_20268_cov_24.659773 20268

NODE_130_length_19995_cov_3.405617 19995

NODE_131_length_19575_cov_2.898668 19575

NODE_132_length_19501_cov_3.607529 19501

NODE_133_length_19345_cov_8.279419 19345

NODE_134_length_19344_cov_22.132770 19344

NODE_135_length_19200_cov_8.139149 19200

NODE_136_length_19139_cov_968.662649 19139

NODE_137_length_18796_cov_4.225602 18796

NODE_138_length_18764_cov_1140.101930 18764

NODE_139_length_18748_cov_3.518643 18748

NODE_140_length_18691_cov_2.778708 18691

NODE_141_length_18088_cov_2.586979 18088

NODE_142_length_18037_cov_6.741797 18037

NODE_143_length_17821_cov_1023.763931 17821

NODE_144_length_17758_cov_26.867593 17758

NODE_145_length_17752_cov_3.611855 17752

NODE_146_length_17329_cov_1076.738625 17329

NODE_147_length_17300_cov_1011.129313 17300

NODE_148_length_17286_cov_27.524114 17286

NODE_149_length_17262_cov_7.909630 17262

NODE_150_length_17179_cov_29.129000 17179

NODE_151_length_17125_cov_2.620035 17125

NODE_152_length_17056_cov_3.641962 17056

NODE_153_length_17022_cov_2.915542 17022

NODE_154_length_16926_cov_8.065319 16926

NODE_155_length_16898_cov_26.485780 16898

NODE_156_length_16764_cov_3.857741 16764

NODE_157_length_16688_cov_3.167558 16688

NODE_158_length_16569_cov_37.513201 16569

NODE_159_length_16567_cov_29.004239 16567

NODE_160_length_16484_cov_78.553838 16484

NODE_161_length_16410_cov_23.594619 16410

NODE_162_length_16309_cov_235.545650 16309

NODE_163_length_15974_cov_27.184434 15974

NODE_164_length_15960_cov_37.471424 15960

NODE_165_length_15856_cov_3.811468 15856

NODE_166_length_15815_cov_238.849619 15815

NODE_167_length_15699_cov_3.274035 15699

NODE_168_length_15615_cov_1045.244730 15615

NODE_169_length_15316_cov_29.538562 15316

NODE_170_length_15204_cov_32.955179 15204

NODE_171_length_14842_cov_3.139920 14842

NODE_172_length_14764_cov_61.112856 14764

NODE_173_length_14635_cov_3.708436 14635

NODE_174_length_14541_cov_2.627640 14541

NODE_175_length_14374_cov_30.638103 14374

NODE_176_length_14123_cov_14.543219 14123

NODE_177_length_14108_cov_2.894613 14108

NODE_178_length_14097_cov_2.961188 14097

NODE_179_length_14077_cov_22.277350 14077

NODE_180_length_14012_cov_2.770294 14012

NODE_181_length_13900_cov_4.109787 13900

NODE_182_length_13872_cov_2.923645 13872

NODE_183_length_13869_cov_2.686116 13869

NODE_184_length_13848_cov_3.755528 13848

NODE_185_length_13634_cov_4.618897 13634

NODE_186_length_13602_cov_2.701779 13602

NODE_187_length_13566_cov_1013.005699 13566

NODE_188_length_13511_cov_3.586727 13511

NODE_189_length_13493_cov_25.430124 13493

NODE_190_length_13402_cov_23.302465 13402

NODE_191_length_13293_cov_66.064738 13293

NODE_192_length_13266_cov_34.064946 13266

NODE_193_length_13226_cov_1164.203174 13226

NODE_194_length_13166_cov_3.045382 13166

NODE_195_length_13148_cov_1231.529978 13148

NODE_196_length_13040_cov_273.093570 13040

NODE_197_length_13027_cov_244.597132 13027

NODE_198_length_13023_cov_1263.724784 13023

NODE_199_length_12799_cov_993.220339 12799

NODE_200_length_12739_cov_26.759303 12739

NODE_201_length_12729_cov_8.081032 12729

NODE_202_length_12662_cov_3.749425 12662

NODE_203_length_12619_cov_9.756925 12619

NODE_204_length_12585_cov_3.064246 12585

NODE_205_length_12560_cov_3.897081 12560

NODE_206_length_12509_cov_3.123575 12509

NODE_207_length_12427_cov_2.959829 12427

NODE_208_length_12396_cov_333.347784 12396

NODE_209_length_12325_cov_21.411084 12325

NODE_210_length_12325_cov_4.280114 12325

NODE_211_length_12261_cov_3.555383 12261

NODE_212_length_12257_cov_4.044993 12257

NODE_213_length_12204_cov_1190.323730 12204

NODE_214_length_12185_cov_3.958945 12185

NODE_215_length_12050_cov_4.347311 12050

NODE_216_length_11925_cov_84.756613 11925

NODE_217_length_11913_cov_1037.480351 11913

NODE_218_length_11904_cov_3.237066 11904

NODE_219_length_11847_cov_21.957344 11847

NODE_220_length_11822_cov_1447.311209 11822

NODE_221_length_11810_cov_3.522926 11810

NODE_222_length_11788_cov_1049.335379 11788

NODE_223_length_11786_cov_4.332026 11786

NODE_224_length_11776_cov_3.564457 11776

NODE_225_length_11761_cov_3.720485 11761

NODE_226_length_11754_cov_1093.353193 11754

NODE_227_length_11737_cov_5.662558 11737

NODE_228_length_11604_cov_3.747770 11604

NODE_229_length_11548_cov_2.769773 11548

NODE_230_length_11515_cov_2.906981 11515

NODE_231_length_11499_cov_1152.011797 11499

NODE_232_length_11476_cov_3.629980 11476

NODE_233_length_11325_cov_3.013398 11325

NODE_234_length_11323_cov_22.387291 11323

NODE_235_length_11296_cov_231.867361 11296

NODE_236_length_11222_cov_25.216620 11222

NODE_237_length_11210_cov_35.509368 11210

NODE_238_length_11208_cov_1266.626468 11208

NODE_239_length_11197_cov_3.370490 11197

NODE_240_length_11173_cov_36.113779 11173

NODE_241_length_11163_cov_3.237396 11163

NODE_242_length_11113_cov_3.178332 11113

NODE_243_length_11037_cov_21.737115 11037

NODE_244_length_10983_cov_3.341874 10983

NODE_245_length_10955_cov_240.930000 10955

NODE_246_length_10954_cov_10.590146 10954

NODE_247_length_10918_cov_3.273405 10918

NODE_248_length_10880_cov_10.747159 10880

NODE_249_length_10700_cov_4.476092 10700

NODE_250_length_10647_cov_10.659271 10647

NODE_251_length_10630_cov_3.345437 10630

NODE_252_length_10609_cov_31.210157 10609

NODE_253_length_10608_cov_1007.724912 10608

NODE_254_length_10551_cov_3.028106 10551

NODE_255_length_10482_cov_3.136856 10482

NODE_256_length_10475_cov_28.780710 10475

NODE_257_length_10444_cov_3.520551 10444

NODE_258_length_10392_cov_2.650382 10392

NODE_259_length_10343_cov_1214.736392 10343

NODE_260_length_10334_cov_3.212667 10334

NODE_261_length_10311_cov_976.212559 10311

NODE_262_length_10304_cov_3.215826 10304

NODE_263_length_10290_cov_2.555252 10290

NODE_264_length_10215_cov_4.317717 10215

NODE_265_length_10163_cov_58.419074 10163

NODE_266_length_10158_cov_4.677324 10158

NODE_267_length_10157_cov_3.727975 10157

NODE_268_length_10140_cov_29.562618 10140

NODE_269_length_10127_cov_31.769956 10127

NODE_270_length_10075_cov_96.278942 10075

NODE_271_length_10033_cov_36.192724 10033

NODE_272_length_9974_cov_1154.767719 9974

NODE_273_length_9966_cov_2.953082 9966

NODE_274_length_9944_cov_2.784913 9944

NODE_275_length_9928_cov_2.719336 9928

NODE_276_length_9899_cov_3.612048 9899

NODE_277_length_9872_cov_63.626770 9872

NODE_278_length_9762_cov_3.008344 9762

NODE_279_length_9740_cov_3.252452 9740

NODE_280_length_9572_cov_61.083955 9572

NODE_281_length_9570_cov_2.914661 9570

NODE_282_length_9553_cov_23.742999 9553

NODE_283_length_9518_cov_311.352425 9518

NODE_284_length_9456_cov_1350.213807 9456

NODE_285_length_9318_cov_73.371478 9318

NODE_286_length_9282_cov_139.575919 9282

NODE_287_length_9275_cov_2.858785 9275

NODE_288_length_9259_cov_79.861908 9259

NODE_289_length_9190_cov_37.683853 9190

NODE_290_length_9189_cov_18.717867 9189

NODE_291_length_9188_cov_2.943173 9188

NODE_292_length_9163_cov_2.933355 9163

NODE_293_length_9159_cov_25.615993 9159

NODE_294_length_9123_cov_34.578849 9123

NODE_295_length_9029_cov_37.149655 9029

NODE_296_length_9022_cov_1136.328203 9022

NODE_297_length_8959_cov_21.972260 8959

NODE_298_length_8924_cov_79.563423 8924

NODE_299_length_8919_cov_1002.881995 8919

NODE_300_length_8871_cov_2.834846 8871

NODE_301_length_8870_cov_6.704594 8870

NODE_302_length_8867_cov_27.062301 8867

NODE_303_length_8822_cov_31.153987 8822

NODE_304_length_8809_cov_2.710418 8809

NODE_305_length_8784_cov_916.711193 8784

NODE_306_length_8738_cov_28.409190 8738

NODE_307_length_8730_cov_27.129452 8730

NODE_308_length_8659_cov_2.815202 8659

NODE_309_length_8617_cov_18.882037 8617

NODE_310_length_8589_cov_2.701781 8589

NODE_311_length_8579_cov_35.758681 8579

NODE_312_length_8559_cov_863.734008 8559

NODE_313_length_8540_cov_7.245021 8540

NODE_314_length_8520_cov_156.344241 8520

NODE_315_length_8495_cov_3.357583 8495

NODE_316_length_8488_cov_2.524131 8488

NODE_317_length_8424_cov_35.878719 8424

NODE_318_length_8420_cov_302.533413 8420

NODE_319_length_8420_cov_124.082367 8420

NODE_320_length_8376_cov_3.462805 8376

NODE_321_length_8365_cov_22.379543 8365

NODE_322_length_8360_cov_12.839253 8360

NODE_323_length_8355_cov_4.002169 8355

NODE_324_length_8338_cov_4.074490 8338

NODE_325_length_8333_cov_6.749577 8333

NODE_326_length_8233_cov_2.498533 8233

NODE_327_length_8222_cov_2.353251 8222

NODE_328_length_8163_cov_37.080168 8163

NODE_329_length_8157_cov_2.673291 8157

NODE_330_length_8141_cov_7.860994 8141

NODE_331_length_8121_cov_3.439375 8121

NODE_332_length_8096_cov_3.302450 8096

NODE_333_length_8010_cov_3.601383 8010

NODE_334_length_8005_cov_228.528931 8005

NODE_335_length_8005_cov_2.386667 8005

NODE_336_length_7981_cov_2.741358 7981

NODE_337_length_7924_cov_3.178549 7924

NODE_338_length_7887_cov_3.533836 7887

NODE_339_length_7876_cov_60.884158 7876

NODE_340_length_7861_cov_2.978478 7861

NODE_341_length_7852_cov_55.932923 7852

NODE_342_length_7803_cov_21.601187 7803

NODE_343_length_7791_cov_4.170631 7791

NODE_344_length_7769_cov_4.031242 7769

NODE_345_length_7726_cov_3.798201 7726

NODE_346_length_7707_cov_7.661004 7707

NODE_347_length_7696_cov_934.007460 7696

NODE_348_length_7645_cov_31.088406 7645

NODE_349_length_7634_cov_29.424198 7634

NODE_350_length_7609_cov_25.649854 7609

NODE_351_length_7593_cov_3.221942 7593

NODE_352_length_7567_cov_3.303514 7567

NODE_353_length_7560_cov_3.417988 7560

NODE_354_length_7534_cov_242.745554 7534

NODE_355_length_7496_cov_28.284505 7496

NODE_356_length_7449_cov_2.678388 7449

NODE_357_length_7397_cov_30.373740 7397

NODE_358_length_7385_cov_2.854707 7385

NODE_359_length_7363_cov_176.383279 7363

NODE_360_length_7341_cov_14.344496 7341

NODE_361_length_7328_cov_2.636876 7328

NODE_362_length_7305_cov_11.161103 7305

NODE_363_length_7303_cov_4.094785 7303

NODE_364_length_7293_cov_2.476237 7293

NODE_365_length_7280_cov_225.984913 7280

NODE_366_length_7274_cov_27.985178 7274

NODE_367_length_7245_cov_3.788734 7245

NODE_368_length_7226_cov_12.798215 7226

NODE_369_length_7215_cov_56.287430 7215

NODE_370_length_7213_cov_150.545823 7213

NODE_371_length_7213_cov_2.950545 7213

NODE_372_length_7209_cov_1185.979592 7209

NODE_373_length_7185_cov_2.730996 7185

NODE_374_length_7183_cov_34.897166 7183

NODE_375_length_7181_cov_273.195481 7181

NODE_376_length_7178_cov_27.907202 7178

NODE_377_length_7173_cov_3.445209 7173

NODE_378_length_7159_cov_5.032658 7159

NODE_379_length_7127_cov_7.701782 7127

NODE_380_length_7122_cov_231.781378 7122

NODE_381_length_7078_cov_2.684038 7078

NODE_382_length_7061_cov_30.350271 7061

NODE_383_length_7028_cov_2.386778 7028

NODE_384_length_7009_cov_3.269198 7009

NODE_385_length_7001_cov_9.402822 7001

NODE_386_length_6973_cov_3.690373 6973

NODE_387_length_6935_cov_2.969622 6935

NODE_388_length_6923_cov_35.107600 6923

NODE_389_length_6910_cov_2.506346 6910

NODE_390_length_6865_cov_10.759031 6865

NODE_391_length_6864_cov_3.082832 6864

NODE_392_length_6860_cov_912.470242 6860

NODE_393_length_6841_cov_2.930298 6841

NODE_394_length_6829_cov_227.808237 6829

NODE_395_length_6746_cov_3.049320 6746

NODE_396_length_6730_cov_2.619176 6730

NODE_397_length_6721_cov_34.666217 6721

NODE_398_length_6696_cov_34.872308 6696

NODE_399_length_6659_cov_2.619624 6659

NODE_400_length_6645_cov_4.819423 6645

NODE_401_length_6644_cov_2.870694 6644

NODE_402_length_6628_cov_24.245094 6628

NODE_403_length_6614_cov_160.998475 6614

NODE_404_length_6604_cov_1309.197587 6604

NODE_405_length_6601_cov_135.696456 6601

NODE_406_length_6601_cov_79.511916 6601

NODE_407_length_6545_cov_11.622958 6545

NODE_408_length_6544_cov_23.367391 6544

NODE_409_length_6512_cov_67.063342 6512

NODE_410_length_6504_cov_35.235075 6504

NODE_411_length_6466_cov_2.733583 6466

NODE_412_length_6443_cov_6.527708 6443

NODE_413_length_6411_cov_2.832914 6411

NODE_414_length_6335_cov_28.639968 6335

NODE_415_length_6334_cov_30.607740 6334

NODE_416_length_6325_cov_2.422010 6325

NODE_417_length_6302_cov_3.654714 6302

NODE_418_length_6273_cov_17.096655 6273

NODE_419_length_6258_cov_3.755602 6258

NODE_420_length_6246_cov_3.615894 6246

NODE_421_length_6206_cov_22.484311 6206

NODE_422_length_6154_cov_22.229382 6154

NODE_423_length_6126_cov_3.659364 6126

NODE_424_length_6120_cov_4.530585 6120

NODE_425_length_6104_cov_89.216730 6104

NODE_426_length_6103_cov_36.775628 6103

NODE_427_length_6096_cov_1046.485019 6096

NODE_428_length_6084_cov_2.724167 6084

NODE_429_length_6078_cov_3.117549 6078

NODE_430_length_6064_cov_74.698286 6064

NODE_431_length_6036_cov_46.739676 6036

NODE_432_length_6026_cov_120.609781 6026

NODE_433_length_6020_cov_356.808718 6020

NODE_434_length_6020_cov_3.748365 6020

NODE_435_length_5981_cov_10.096861 5981

NODE_436_length_5977_cov_2.998649 5977

NODE_437_length_5956_cov_3.181156 5956

NODE_438_length_5905_cov_36.888547 5905

NODE_439_length_5891_cov_2.950994 5891

NODE_440_length_5860_cov_2.834798 5860

NODE_441_length_5798_cov_3.982936 5798

NODE_442_length_5784_cov_3.383138 5784

NODE_443_length_5742_cov_241.825567 5742

NODE_444_length_5724_cov_3.099312 5724

NODE_445_length_5627_cov_3.918880 5627

NODE_446_length_5616_cov_7.211832 5616

NODE_447_length_5607_cov_75.994056 5607

NODE_448_length_5554_cov_9.418803 5554

NODE_449_length_5544_cov_3.022226 5544

NODE_450_length_5525_cov_26.105850 5525

NODE_451_length_5495_cov_30.039522 5495

NODE_452_length_5444_cov_2.966228 5444

NODE_453_length_5439_cov_3.630015 5439

NODE_454_length_5429_cov_42.065687 5429

NODE_455_length_5425_cov_24.373371 5425

NODE_456_length_5417_cov_3.154420 5417

NODE_457_length_5405_cov_12.800374 5405

NODE_458_length_5392_cov_2.688402 5392

NODE_459_length_5371_cov_2.618698 5371

NODE_460_length_5354_cov_3.163993 5354

NODE_461_length_5353_cov_3.160060 5353

NODE_462_length_5336_cov_2.561447 5336

NODE_463_length_5325_cov_3.361101 5325

NODE_464_length_5312_cov_1337.990869 5312

NODE_465_length_5311_cov_3.230213 5311

NODE_466_length_5302_cov_1130.487136 5302

NODE_467_length_5271_cov_2.687117 5271

NODE_468_length_5266_cov_3.356745 5266

NODE_469_length_5264_cov_4.348435 5264

NODE_470_length_5261_cov_30.724164 5261

NODE_471_length_5241_cov_2.810066 5241

NODE_472_length_5211_cov_2.727696 5211

NODE_473_length_5198_cov_24.768618 5198

NODE_474_length_5189_cov_3.703155 5189

NODE_475_length_5158_cov_3.682736 5158

NODE_476_length_5149_cov_3.770907 5149

NODE_477_length_5148_cov_37.928922 5148

NODE_478_length_5139_cov_34.643194 5139

NODE_479_length_5129_cov_14.469846 5129

NODE_480_length_5124_cov_2.646873 5124

NODE_481_length_5109_cov_3.061535 5109

NODE_482_length_5106_cov_6.679271 5106

NODE_483_length_5097_cov_3.315946 5097

NODE_484_length_5065_cov_57.870858 5065

NODE_485_length_5064_cov_3.158714 5064

NODE_486_length_5046_cov_42.952314 5046

NODE_487_length_5045_cov_2.796994 5045

NODE_488_length_5045_cov_2.781162 5045

NODE_489_length_4995_cov_3.431984 4995

NODE_490_length_4987_cov_225.003852 4987

NODE_491_length_4983_cov_3.097606 4983

NODE_492_length_4979_cov_18.014825 4979

NODE_493_length_4974_cov_360.768855 4974

NODE_494_length_4961_cov_1131.314921 4961

NODE_495_length_4951_cov_32.299428 4951

NODE_496_length_4899_cov_29.747110 4899

NODE_497_length_4898_cov_2.781127 4898

NODE_498_length_4890_cov_1086.457911 4890

NODE_499_length_4886_cov_3.606500 4886

NODE_500_length_4860_cov_104.299480 4860

NODE_501_length_4859_cov_3.321191 4859

NODE_502_length_4833_cov_32.337170 4833

NODE_503_length_4816_cov_17.066583 4816

NODE_504_length_4800_cov_3.337408 4800

NODE_505_length_4791_cov_3.186444 4791

NODE_506_length_4772_cov_13.765317 4772

NODE_507_length_4765_cov_37.873885 4765

NODE_508_length_4763_cov_1035.004460 4763

NODE_509_length_4734_cov_61.054499 4734

NODE_510_length_4715_cov_21.118026 4715

NODE_511_length_4699_cov_930.548019 4699

NODE_512_length_4696_cov_2.500539 4696

NODE_513_length_4687_cov_19.399827 4687

NODE_514_length_4687_cov_3.213083 4687

NODE_515_length_4682_cov_17.108278 4682

NODE_516_length_4681_cov_2.596628 4681

NODE_517_length_4675_cov_21.728355 4675

NODE_518_length_4671_cov_3.166811 4671

NODE_519_length_4664_cov_3.057930 4664

NODE_520_length_4657_cov_22.321599 4657

NODE_521_length_4652_cov_26.571460 4652

NODE_522_length_4639_cov_21.066318 4639

NODE_523_length_4637_cov_3.224574 4637

NODE_524_length_4634_cov_231.999782 4634

NODE_525_length_4623_cov_3.626313 4623

NODE_526_length_4620_cov_3.024096 4620

NODE_527_length_4617_cov_224.895441 4617

NODE_528_length_4599_cov_3.147007 4599

NODE_529_length_4588_cov_22.031988 4588

NODE_530_length_4555_cov_3.024444 4555

NODE_531_length_4533_cov_3.200983 4533

NODE_532_length_4531_cov_916.757596 4531

NODE_533_length_4527_cov_1161.019231 4527

NODE_534_length_4519_cov_2.876568 4519

NODE_535_length_4506_cov_2.646372 4506

NODE_536_length_4497_cov_12.840837 4497

NODE_537_length_4455_cov_236.752273 4455

NODE_538_length_4445_cov_13.930068 4445

NODE_539_length_4435_cov_3.300913 4435

NODE_540_length_4432_cov_36.540553 4432

NODE_541_length_4428_cov_4.193231 4428

NODE_542_length_4420_cov_10.627950 4420

NODE_543_length_4396_cov_3.041926 4396

NODE_544_length_4379_cov_2.501850 4379

NODE_545_length_4369_cov_1889.880621 4369

NODE_546_length_4369_cov_219.275614 4369

NODE_547_length_4368_cov_974.746116 4368

NODE_548_length_4358_cov_12.531954 4358

NODE_549_length_4340_cov_240.607701 4340

NODE_550_length_4327_cov_3.145131 4327

NODE_551_length_4311_cov_2.750000 4311

NODE_552_length_4296_cov_2.749352 4296

NODE_553_length_4288_cov_27.818805 4288

NODE_554_length_4275_cov_26.800237 4275

NODE_555_length_4272_cov_3.254921 4272

NODE_556_length_4267_cov_2.626781 4267

NODE_557_length_4264_cov_8.029936 4264

NODE_558_length_4248_cov_33.568567 4248

NODE_559_length_4224_cov_53.543056 4224

NODE_560_length_4207_cov_2.548170 4207

NODE_561_length_4202_cov_2.589101 4202

NODE_562_length_4181_cov_2.462918 4181

NODE_563_length_4175_cov_2.651214 4175

NODE_564_length_4163_cov_21.122687 4163

NODE_565_length_4082_cov_3.176310 4082

NODE_566_length_4077_cov_2.841870 4077

NODE_567_length_4073_cov_32.815082 4073

NODE_568_length_4068_cov_25.436830 4068

NODE_569_length_4045_cov_3.526065 4045

NODE_570_length_4042_cov_1154.293705 4042

NODE_571_length_4036_cov_309.757096 4036

NODE_572_length_4032_cov_235.971587 4032

NODE_573_length_4020_cov_3.010088 4020

NODE_574_length_4013_cov_1.774886 4013

NODE_575_length_4012_cov_35.976245 4012

NODE_576_length_3996_cov_31.869323 3996

NODE_577_length_3991_cov_223.946392 3991

NODE_578_length_3945_cov_2.653728 3945

NODE_579_length_3941_cov_3.081575 3941

NODE_580_length_3896_cov_446.308253 3896

NODE_581_length_3888_cov_4.239499 3888

NODE_582_length_3885_cov_3.146475 3885

NODE_583_length_3870_cov_33.521887 3870

NODE_584_length_3858_cov_2.847752 3858

NODE_585_length_3855_cov_2.910263 3855

NODE_586_length_3839_cov_180.519556 3839

NODE_587_length_3825_cov_2.486472 3825

NODE_588_length_3811_cov_26.713791 3811

NODE_589_length_3771_cov_25.366254 3771

NODE_590_length_3739_cov_2.090119 3739

NODE_591_length_3721_cov_2.927714 3721

NODE_592_length_3715_cov_13.960656 3715

NODE_593_length_3689_cov_2.925151 3689

NODE_594_length_3684_cov_26.664370 3684

NODE_595_length_3673_cov_10.438364 3673

NODE_596_length_3668_cov_31.233601 3668

NODE_597_length_3648_cov_211.781520 3648

NODE_598_length_3647_cov_10.464922 3647

NODE_599_length_3643_cov_2.358417 3643

NODE_600_length_3622_cov_2.508551 3622

NODE_601_length_3619_cov_2.531425 3619

NODE_602_length_3615_cov_19.994382 3615

NODE_603_length_3607_cov_20.969313 3607

NODE_604_length_3597_cov_3.836251 3597

NODE_605_length_3596_cov_31.253036 3596

NODE_606_length_3578_cov_2.874539 3578

NODE_607_length_3556_cov_57.644102 3556

NODE_608_length_3528_cov_2.545926 3528

NODE_609_length_3516_cov_35.930656 3516

NODE_610_length_3512_cov_94.456754 3512

NODE_611_length_3510_cov_3.415340 3510

NODE_612_length_3492_cov_11.402968 3492

NODE_613_length_3489_cov_11.333722 3489

NODE_614_length_3477_cov_2.376680 3477

NODE_615_length_3472_cov_3.752707 3472

NODE_616_length_3429_cov_19.767635 3429

NODE_617_length_3416_cov_3.301101 3416

NODE_618_length_3410_cov_24.212519 3410

NODE_619_length_3402_cov_4.170899 3402

NODE_620_length_3401_cov_24.115063 3401

NODE_621_length_3401_cov_3.310819 3401

NODE_622_length_3387_cov_40.015906 3387

NODE_623_length_3382_cov_16.551247 3382

NODE_624_length_3369_cov_2.789077 3369

NODE_625_length_3367_cov_2.629529 3367

NODE_626_length_3332_cov_3.063473 3332

NODE_627_length_3313_cov_2.939533 3313

NODE_628_length_3302_cov_42.469664 3302

NODE_629_length_3281_cov_3.366398 3281

NODE_630_length_3277_cov_20.724705 3277

NODE_631_length_3255_cov_3.100312 3255

NODE_632_length_3254_cov_78.955924 3254

NODE_633_length_3250_cov_2.794053 3250

NODE_634_length_3232_cov_2.899906 3232

NODE_635_length_3220_cov_2.918167 3220

NODE_636_length_3207_cov_2.460343 3207

NODE_637_length_3198_cov_4421.287623 3198

NODE_638_length_3178_cov_2.267051 3178

NODE_639_length_3174_cov_46.859250 3174

NODE_640_length_3164_cov_23.105179 3164

NODE_641_length_3158_cov_2.578795 3158

NODE_642_length_3152_cov_8.608008 3152

NODE_643_length_3142_cov_35.855847 3142

NODE_644_length_3137_cov_2.233939 3137

NODE_645_length_3118_cov_36.813581 3118

NODE_646_length_3113_cov_945.009156 3113

NODE_647_length_3096_cov_3.219993 3096

NODE_648_length_3066_cov_4.180339 3066

NODE_649_length_3054_cov_3.724908 3054

NODE_650_length_3054_cov_2.956319 3054

NODE_651_length_3053_cov_2.948632 3053

NODE_652_length_3035_cov_3.715772 3035

NODE_653_length_3016_cov_2.569740 3016

NODE_654_length_3010_cov_3.296447 3010

NODE_655_length_3007_cov_2.946477 3007

NODE_656_length_2991_cov_189.736717 2991

NODE_657_length_2990_cov_67.712436 2990

NODE_658_length_2977_cov_15.111225 2977

NODE_659_length_2975_cov_2.327397 2975

NODE_660_length_2968_cov_87.403021 2968

NODE_661_length_2967_cov_45.018544 2967

NODE_662_length_2966_cov_25.432154 2966

NODE_663_length_2966_cov_2.824459 2966

NODE_664_length_2962_cov_4.262470 2962

NODE_665_length_2960_cov_2.758692 2960

NODE_666_length_2951_cov_1.847030 2951

NODE_667_length_2946_cov_93.717053 2946

NODE_668_length_2946_cov_2.469042 2946

NODE_669_length_2928_cov_2.840933 2928

NODE_670_length_2925_cov_2.702439 2925

NODE_671_length_2910_cov_2.291068 2910

NODE_672_length_2902_cov_172.146470 2902

NODE_673_length_2889_cov_1.913903 2889

NODE_674_length_2870_cov_3.134636 2870

NODE_675_length_2868_cov_180.869179 2868

NODE_676_length_2863_cov_2.788818 2863

NODE_677_length_2859_cov_12.380528 2859

NODE_678_length_2857_cov_3.504640 2857

NODE_679_length_2849_cov_28.667860 2849

NODE_680_length_2842_cov_1215.331539 2842

NODE_681_length_2839_cov_23.618894 2839

NODE_682_length_2821_cov_29.172451 2821

NODE_683_length_2818_cov_31.621788 2818

NODE_684_length_2813_cov_2.887962 2813

NODE_685_length_2802_cov_2.706225 2802

NODE_686_length_2791_cov_1087.283626 2791

NODE_687_length_2789_cov_25.953548 2789

NODE_688_length_2785_cov_97.977656 2785

NODE_689_length_2770_cov_28.732597 2770

NODE_690_length_2751_cov_3.149852 2751

NODE_691_length_2741_cov_2.529412 2741

NODE_692_length_2739_cov_2.153130 2739

NODE_693_length_2736_cov_37.965311 2736

NODE_694_length_2727_cov_4.466692 2727

NODE_695_length_2720_cov_106.126829 2720

NODE_696_length_2716_cov_2.006013 2716

NODE_697_length_2703_cov_2.455816 2703

NODE_698_length_2702_cov_1.757461 2702

NODE_699_length_2697_cov_3.382665 2697

NODE_700_length_2691_cov_214.396434 2691

NODE_701_length_2689_cov_26.847760 2689

NODE_702_length_2663_cov_29.115031 2663

NODE_703_length_2660_cov_1.962380 2660

NODE_704_length_2659_cov_1.885561 2659

NODE_705_length_2656_cov_3.136870 2656

NODE_706_length_2652_cov_14.465152 2652

NODE_707_length_2644_cov_12.675550 2644

NODE_708_length_2642_cov_2.757634 2642

NODE_709_length_2623_cov_2516.234424 2623

NODE_710_length_2618_cov_2.663675 2618

NODE_711_length_2615_cov_3.316016 2615

NODE_712_length_2594_cov_2.187082 2594

NODE_713_length_2584_cov_4.920127 2584

NODE_714_length_2574_cov_44.363636 2574

NODE_715_length_2565_cov_2.333068 2565

NODE_716_length_2561_cov_4.412610 2561

NODE_717_length_2560_cov_3.189621 2560

NODE_718_length_2558_cov_1.671994 2558

NODE_719_length_2553_cov_2.740592 2553

NODE_720_length_2520_cov_2.742394 2520

NODE_721_length_2517_cov_1.572705 2517

NODE_722_length_2514_cov_23.156568 2514

NODE_723_length_2497_cov_3.009419 2497

NODE_724_length_2495_cov_16.769672 2495

NODE_725_length_2492_cov_2.856791 2492

NODE_726_length_2484_cov_12.468506 2484

NODE_727_length_2482_cov_27.466419 2482

NODE_728_length_2475_cov_29.097521 2475

NODE_729_length_2475_cov_2.580579 2475

NODE_730_length_2471_cov_2.959851 2471

NODE_731_length_2470_cov_6.840994 2470

NODE_732_length_2469_cov_6.229080 2469

NODE_733_length_2448_cov_91.703719 2448

NODE_734_length_2438_cov_1.487621 2438

NODE_735_length_2436_cov_11.053339 2436

NODE_736_length_2429_cov_22.622157 2429

NODE_737_length_2428_cov_234.707965 2428

NODE_738_length_2421_cov_22.942942 2421

NODE_739_length_2418_cov_872.827761 2418

NODE_740_length_2415_cov_3.061441 2415

NODE_741_length_2414_cov_17.482408 2414

NODE_742_length_2412_cov_28.419177 2412

NODE_743_length_2406_cov_22.443216 2406

NODE_744_length_2402_cov_1.858117 2402

NODE_745_length_2400_cov_142.444776 2400

NODE_746_length_2387_cov_46.735420 2387

NODE_747_length_2387_cov_24.666381 2387

NODE_748_length_2387_cov_2.640652 2387

NODE_749_length_2386_cov_976.608357 2386

NODE_750_length_2367_cov_2.943772 2367

NODE_751_length_2366_cov_29.527910 2366

NODE_752_length_2365_cov_2.716883 2365

NODE_753_length_2363_cov_2.723137 2363

NODE_754_length_2357_cov_25.480452 2357

NODE_755_length_2350_cov_2.952941 2350

NODE_756_length_2341_cov_15.370079 2341

NODE_757_length_2336_cov_3.246383 2336

NODE_758_length_2335_cov_1.889912 2335

NODE_759_length_2320_cov_1350.445916 2320

NODE_760_length_2316_cov_22.038036 2316

NODE_761_length_2304_cov_99.690084 2304

NODE_762_length_2301_cov_18.902493 2301

NODE_763_length_2300_cov_14.737639 2300

NODE_764_length_2299_cov_12.027184 2299

NODE_765_length_2298_cov_229.469906 2298

NODE_766_length_2295_cov_13.985268 2295

NODE_767_length_2295_cov_12.699107 2295

NODE_768_length_2292_cov_71.321413 2292

NODE_769_length_2291_cov_99.791145 2291

NODE_770_length_2289_cov_2.305282 2289

NODE_771_length_2288_cov_2.837886 2288

NODE_772_length_2280_cov_75.031910 2280

NODE_773_length_2266_cov_3.039349 2266

NODE_774_length_2263_cov_59.411232 2263

NODE_775_length_2260_cov_158.354195 2260

NODE_776_length_2250_cov_28.570387 2250

NODE_777_length_2238_cov_112.808978 2238

NODE_778_length_2237_cov_28.529789 2237

NODE_779_length_2234_cov_4.086278 2234

NODE_780_length_2229_cov_61.860166 2229

NODE_781_length_2227_cov_80.417587 2227

NODE_782_length_2221_cov_21.925669 2221

NODE_783_length_2210_cov_827.314617 2210

NODE_784_length_2206_cov_2.053928 2206

NODE_785_length_2205_cov_59.114419 2205

NODE_786_length_2202_cov_1944.037261 2202

NODE_787_length_2198_cov_33.115259 2198

NODE_788_length_2194_cov_5533.969612 2194

NODE_789_length_2183_cov_2.986842 2183

NODE_790_length_2183_cov_1.492481 2183

NODE_791_length_2180_cov_20.565647 2180

NODE_792_length_2173_cov_1.735600 2173

NODE_793_length_2172_cov_98.485120 2172

NODE_794_length_2172_cov_73.094473 2172

NODE_795_length_2168_cov_2.214860 2168

NODE_796_length_2166_cov_237.926575 2166

NODE_797_length_2166_cov_1.802463 2166

NODE_798_length_2160_cov_27.128741 2160

NODE_799_length_2149_cov_1.646609 2149

NODE_800_length_2140_cov_2.352038 2140

NODE_801_length_2119_cov_1.590116 2119

NODE_802_length_2117_cov_1008.316298 2117

NODE_803_length_2111_cov_852.146887 2111

NODE_804_length_2106_cov_2.397367 2106

NODE_805_length_2094_cov_156.584110 2094

NODE_806_length_2087_cov_2.989665 2087

NODE_807_length_2080_cov_947.650370 2080

NODE_808_length_2076_cov_2.019792 2076

NODE_809_length_2062_cov_2.167912 2062

NODE_810_length_2057_cov_1.527473 2057

NODE_811_length_2056_cov_3902.386807 2056

NODE_812_length_2052_cov_220.924887 2052

NODE_813_length_2052_cov_13.928393 2052

NODE_814_length_2043_cov_25.776157 2043

NODE_815_length_2041_cov_1.661128 2041

NODE_816_length_2038_cov_29.656077 2038

NODE_817_length_2036_cov_2.750126 2036

NODE_818_length_2035_cov_21.097980 2035

NODE_819_length_2028_cov_1.627978 2028

NODE_820_length_2025_cov_2.101015 2025

NODE_821_length_2024_cov_107.731844 2024

NODE_822_length_2002_cov_2.454032 2002

NODE_823_length_1999_cov_1.886831 1999

NODE_824_length_1997_cov_2.138002 1997

NODE_825_length_1995_cov_35.962371 1995

NODE_826_length_1994_cov_2.616813 1994

NODE_827_length_1988_cov_884.712882 1988

NODE_828_length_1986_cov_63.918695 1986

NODE_829_length_1971_cov_13.158142 1971

NODE_830_length_1968_cov_1.479875 1968

NODE_831_length_1961_cov_2.974292 1961

NODE_832_length_1957_cov_2.608307 1957

NODE_833_length_1947_cov_3.546512 1947

NODE_834_length_1944_cov_497.377978 1944

NODE_835_length_1942_cov_3.826709 1942

NODE_836_length_1937_cov_22.000000 1937

NODE_837_length_1932_cov_1.475759 1932

NODE_838_length_1930_cov_3.993067 1930

NODE_839_length_1927_cov_2.795406 1927

NODE_840_length_1917_cov_2.171858 1917

NODE_841_length_1914_cov_27.382464 1914

NODE_842_length_1913_cov_29.148009 1913

NODE_843_length_1913_cov_2.051130 1913

NODE_844_length_1900_cov_30.893767 1900

NODE_845_length_1890_cov_2.102997 1890

NODE_846_length_1887_cov_1.997271 1887

NODE_847_length_1884_cov_30.677966 1884

NODE_848_length_1867_cov_1.234547 1867

NODE_849_length_1866_cov_1.525124 1866

NODE_850_length_1865_cov_1.972376 1865

NODE_851_length_1860_cov_1.993352 1860

NODE_852_length_1858_cov_1.560177 1858

NODE_853_length_1854_cov_1.674819 1854

NODE_854_length_1853_cov_47.492770 1853

NODE_855_length_1851_cov_28.205457 1851

NODE_856_length_1842_cov_15.906547 1842

NODE_857_length_1834_cov_1.897695 1834

NODE_858_length_1823_cov_11.118778 1823

NODE_859_length_1823_cov_4.047511 1823

NODE_860_length_1815_cov_1.625568 1815

NODE_861_length_1814_cov_9.480387 1814

NODE_862_length_1802_cov_19.311391 1802

NODE_863_length_1802_cov_2.496852 1802

NODE_864_length_1800_cov_1.963897 1800

NODE_865_length_1799_cov_247.241972 1799

NODE_866_length_1795_cov_2.836782 1795

NODE_867_length_1789_cov_1094.772780 1789

NODE_868_length_1782_cov_9.789230 1782

NODE_869_length_1781_cov_1.692932 1781

NODE_870_length_1776_cov_1.435212 1776

NODE_871_length_1773_cov_1.727008 1773

NODE_872_length_1767_cov_7.121495 1767

NODE_873_length_1758_cov_169.810922 1758

NODE_874_length_1758_cov_132.957134 1758

NODE_875_length_1756_cov_2.222810 1756

NODE_876_length_1752_cov_96.850324 1752

NODE_877_length_1745_cov_1.720118 1745

NODE_878_length_1743_cov_2.087678 1743

NODE_879_length_1741_cov_13.148873 1741

NODE_880_length_1740_cov_101.278932 1740

NODE_881_length_1739_cov_33.052850 1739

NODE_882_length_1738_cov_36.250149 1738

NODE_883_length_1737_cov_60.309156 1737

NODE_884_length_1735_cov_15.458333 1735

NODE_885_length_1734_cov_1.282906 1734

NODE_886_length_1732_cov_1.555158 1732

NODE_887_length_1726_cov_1.435667 1726

NODE_888_length_1724_cov_2.291791 1724

NODE_889_length_1723_cov_1.254796 1723

NODE_890_length_1716_cov_2.632751 1716

NODE_891_length_1710_cov_3.898489 1710

NODE_892_length_1709_cov_2.577388 1709

NODE_893_length_1704_cov_4.465737 1704

NODE_894_length_1702_cov_2.536126 1702

NODE_895_length_1696_cov_2.709324 1696

NODE_896_length_1692_cov_1.748320 1692

NODE_897_length_1686_cov_2.085224 1686

NODE_898_length_1683_cov_2.154791 1683

NODE_899_length_1681_cov_28.875154 1681

NODE_900_length_1674_cov_1887.450278 1674

NODE_901_length_1674_cov_2.765905 1674

NODE_902_length_1673_cov_1.504326 1673

NODE_903_length_1668_cov_1.977681 1668

NODE_904_length_1668_cov_1.858648 1668

NODE_905_length_1658_cov_991.333749 1658

NODE_906_length_1657_cov_61.763421 1657

NODE_907_length_1646_cov_146.072910 1646

NODE_908_length_1646_cov_22.575739 1646

NODE_909_length_1646_cov_4.218102 1646

NODE_910_length_1645_cov_6.615094 1645

NODE_911_length_1639_cov_69.020833 1639

NODE_912_length_1639_cov_3.093434 1639

NODE_913_length_1636_cov_2.177736 1636

NODE_914_length_1631_cov_2.069162 1631

NODE_915_length_1631_cov_2.025381 1631

NODE_916_length_1629_cov_1.783990 1629

NODE_917_length_1627_cov_2.736641 1627

NODE_918_length_1624_cov_2.126195 1624

NODE_919_length_1619_cov_2.911125 1619

NODE_920_length_1612_cov_21.131663 1612

NODE_921_length_1611_cov_2.113753 1611

NODE_922_length_1611_cov_2.019280 1611

NODE_923_length_1608_cov_2.942048 1608

NODE_924_length_1608_cov_2.560206 1608

NODE_925_length_1604_cov_7.026469 1604

NODE_926_length_1593_cov_2.560468 1593

NODE_927_length_1590_cov_5.545928 1590

NODE_928_length_1581_cov_27.012451 1581

NODE_929_length_1578_cov_17.926461 1578

NODE_930_length_1576_cov_1.863905 1576

NODE_931_length_1575_cov_193.370395 1575

NODE_932_length_1574_cov_1.825543 1574

NODE_933_length_1573_cov_2.160738 1573

NODE_934_length_1570_cov_2.855446 1570

NODE_935_length_1568_cov_5.832122 1568

NODE_936_length_1562_cov_2.959522 1562

NODE_937_length_1561_cov_2173.128154 1561

NODE_938_length_1561_cov_1.454183 1561

NODE_939_length_1561_cov_1.411023 1561

NODE_940_length_1558_cov_143.343313 1558

NODE_941_length_1554_cov_1.908606 1554

NODE_942_length_1553_cov_33.425901 1553

NODE_943_length_1553_cov_1.542724 1553

NODE_944_length_1551_cov_2.846925 1551

NODE_945_length_1548_cov_12.813128 1548

NODE_946_length_1547_cov_1399.978552 1547

NODE_947_length_1546_cov_1.688799 1546

NODE_948_length_1546_cov_1.368209 1546

NODE_949_length_1545_cov_7.402013 1545

NODE_950_length_1542_cov_2.313383 1542

NODE_951_length_1542_cov_1.366510 1542

NODE_952_length_1525_cov_2.735374 1525

NODE_953_length_1525_cov_1.563946 1525

NODE_954_length_1516_cov_3.000000 1516

NODE_955_length_1510_cov_13.067354 1510

NODE_956_length_1508_cov_67.408121 1508

NODE_957_length_1508_cov_64.819683 1508

NODE_958_length_1506_cov_12.581668 1506

NODE_959_length_1503_cov_2.432320 1503

NODE_960_length_1502_cov_20.340014 1502

NODE_961_length_1502_cov_2.086386 1502

NODE_962_length_1498_cov_7.913375 1498

NODE_963_length_1491_cov_1.452646 1491

NODE_964_length_1488_cov_1.868807 1488

NODE_965_length_1488_cov_1.729239 1488

NODE_966_length_1487_cov_2.062151 1487

NODE_967_length_1486_cov_1.749825 1486

NODE_968_length_1485_cov_1848.776923 1485

NODE_969_length_1484_cov_3.645206 1484

NODE_970_length_1483_cov_32.372549 1483

NODE_971_length_1483_cov_1.563725 1483

NODE_972_length_1482_cov_2.823406 1482

NODE_973_length_1482_cov_1.765943 1482

NODE_974_length_1482_cov_1.695865 1482

NODE_975_length_1479_cov_2130.120084 1479

NODE_976_length_1478_cov_40.326774 1478

NODE_977_length_1477_cov_962.491561 1477

NODE_978_length_1476_cov_1.271640 1476

NODE_979_length_1473_cov_1.300423 1473

NODE_980_length_1472_cov_13.952011 1472

NODE_981_length_1471_cov_1.924435 1471

NODE_982_length_1468_cov_3463.731776 1468

NODE_983_length_1466_cov_23.275691 1466

NODE_984_length_1463_cov_1.457386 1463

NODE_985_length_1462_cov_1.363184 1462

NODE_986_length_1461_cov_428.098151 1461

NODE_987_length_1447_cov_2.326868 1447

NODE_988_length_1447_cov_1.450431 1447

NODE_989_length_1445_cov_1.758993 1445

NODE_990_length_1442_cov_1.313627 1442

NODE_991_length_1437_cov_53.197540 1437

NODE_992_length_1430_cov_2.306909 1430

NODE_993_length_1429_cov_1.737991 1429

NODE_994_length_1424_cov_2.833455 1424

NODE_995_length_1423_cov_1.665205 1423

NODE_996_length_1421_cov_2.766471 1421

NODE_997_length_1418_cov_65.038885 1418

NODE_998_length_1417_cov_22.052129 1417

NODE_999_length_1415_cov_71.914706 1415

NODE_1000_length_1415_cov_1.842647 1415

NODE_1001_length_1412_cov_5.708917 1412

NODE_1002_length_1411_cov_3.267699 1411

NODE_1003_length_1408_cov_7.568367 1408

NODE_1004_length_1408_cov_7.467849 1408

NODE_1005_length_1406_cov_2.470022 1406

NODE_1006_length_1406_cov_1.564767 1406

NODE_1007_length_1406_cov_1.411547 1406

NODE_1008_length_1404_cov_222.360267 1404

NODE_1009_length_1392_cov_39.938669 1392

NODE_1010_length_1388_cov_2.531883 1388

NODE_1011_length_1387_cov_2.043544 1387

NODE_1012_length_1385_cov_2.797744 1385

NODE_1013_length_1384_cov_1.731377 1384

NODE_1014_length_1379_cov_62.158610 1379

NODE_1015_length_1378_cov_80.868481 1378

NODE_1016_length_1376_cov_1.781226 1376

NODE_1017_length_1374_cov_1.711145 1374

NODE_1018_length_1373_cov_2906.546282 1373

NODE_1019_length_1373_cov_2.386191 1373

NODE_1020_length_1372_cov_1.490509 1372

NODE_1021_length_1371_cov_65.336626 1371

NODE_1022_length_1370_cov_247.606844 1370

NODE_1023_length_1367_cov_7.364329 1367

NODE_1024_length_1365_cov_234.477863 1365

NODE_1025_length_1364_cov_1.709702 1364

NODE_1026_length_1362_cov_1.651875 1362

NODE_1027_length_1362_cov_1.612854 1362

NODE_1028_length_1359_cov_131.576687 1359

NODE_1029_length_1358_cov_1.312356 1358

NODE_1030_length_1357_cov_3.196621 1357

NODE_1031_length_1357_cov_2.340246 1357

NODE_1032_length_1356_cov_1.909301 1356

NODE_1033_length_1355_cov_9.903077 1355

NODE_1034_length_1355_cov_1.888462 1355

NODE_1035_length_1353_cov_1.404468 1353

NODE_1036_length_1351_cov_1.719136 1351

NODE_1037_length_1349_cov_1.326893 1349

NODE_1038_length_1348_cov_4.505800 1348

NODE_1039_length_1346_cov_2.643687 1346

NODE_1040_length_1340_cov_60.432685 1340

NODE_1041_length_1340_cov_1.748638 1340

NODE_1042_length_1338_cov_1.613406 1338

NODE_1043_length_1336_cov_1.649493 1336

NODE_1044_length_1332_cov_1.585748 1332

NODE_1045_length_1331_cov_274.164577 1331

NODE_1046_length_1329_cov_15.701727 1329

NODE_1047_length_1320_cov_1.671937 1320

NODE_1048_length_1318_cov_1.104513 1318

NODE_1049_length_1316_cov_6.252974 1316

NODE_1050_length_1310_cov_1.491633 1310

NODE_1051_length_1309_cov_46.155502 1309

NODE_1052_length_1309_cov_7.500797 1309

NODE_1053_length_1309_cov_2.186603 1309

NODE_1054_length_1308_cov_2.412610 1308

NODE_1055_length_1306_cov_1.509193 1306

NODE_1056_length_1303_cov_1.577724 1303

NODE_1057_length_1302_cov_3.170008 1302

NODE_1058_length_1301_cov_8.320225 1301

NODE_1059_length_1300_cov_2.103614 1300

NODE_1060_length_1299_cov_110.155949 1299

NODE_1061_length_1297_cov_16.807568 1297

NODE_1062_length_1297_cov_1.326892 1297

NODE_1063_length_1296_cov_10.801773 1296

NODE_1064_length_1294_cov_1.488297 1294

NODE_1065_length_1293_cov_2.676898 1293

NODE_1066_length_1291_cov_1.492718 1291

NODE_1067_length_1289_cov_1.450567 1289

NODE_1068_length_1287_cov_1.497565 1287

NODE_1069_length_1284_cov_1.920260 1284

NODE_1070_length_1279_cov_2.828431 1279

NODE_1071_length_1277_cov_1.390344 1277

NODE_1072_length_1274_cov_1.196062 1274

NODE_1073_length_1272_cov_31.834018 1272

NODE_1074_length_1272_cov_1.405094 1272

NODE_1075_length_1270_cov_1.535802 1270

NODE_1076_length_1269_cov_2.948105 1269

NODE_1077_length_1269_cov_1.925041 1269

NODE_1078_length_1265_cov_1.458678 1265

NODE_1079_length_1264_cov_1.596361 1264

NODE_1080_length_1260_cov_3.853112 1260

NODE_1081_length_1257_cov_3.909318 1257

NODE_1082_length_1256_cov_28.327227 1256

NODE_1083_length_1256_cov_1.611990 1256

NODE_1084_length_1251_cov_1.954013 1251

NODE_1085_length_1251_cov_1.234950 1251

NODE_1086_length_1248_cov_28.190277 1248

NODE_1087_length_1247_cov_2.740772 1247

NODE_1088_length_1246_cov_1.850546 1246

NODE_1089_length_1240_cov_1012.565401 1240

NODE_1090_length_1240_cov_20.167089 1240

NODE_1091_length_1238_cov_66.550296 1238

NODE_1092_length_1237_cov_27.210660 1237

NODE_1093_length_1234_cov_1.564037 1234

NODE_1094_length_1233_cov_3.196095 1233

NODE_1095_length_1231_cov_1.745748 1231

NODE_1096_length_1230_cov_33.521702 1230

NODE_1097_length_1230_cov_2.144681 1230

NODE_1098_length_1228_cov_2.415175 1228

NODE_1099_length_1228_cov_2.080989 1228

NODE_1100_length_1228_cov_1.419437 1228

NODE_1101_length_1225_cov_1.676923 1225

NODE_1102_length_1222_cov_1.498715 1222

NODE_1103_length_1221_cov_2.648370 1221

NODE_1104_length_1218_cov_1.679278 1218

NODE_1105_length_1217_cov_1.739243 1217

NODE_1106_length_1216_cov_2.113695 1216

NODE_1107_length_1215_cov_19.927586 1215

NODE_1108_length_1215_cov_1.536207 1215

NODE_1109_length_1213_cov_1.515544 1213

NODE_1110_length_1211_cov_29.944637 1211

NODE_1111_length_1210_cov_2.045887 1210

NODE_1112_length_1208_cov_14.440590 1208

NODE_1113_length_1208_cov_1.501301 1208

NODE_1114_length_1207_cov_1.484375 1207

NODE_1115_length_1204_cov_116.840731 1204

NODE_1116_length_1203_cov_1.154181 1203

NODE_1117_length_1198_cov_14.710411 1198

NODE_1118_length_1198_cov_4.190726 1198

NODE_1119_length_1194_cov_8.220369 1194

NODE_1120_length_1191_cov_1.252641 1191

NODE_1121_length_1190_cov_11.228194 1190

NODE_1122_length_1189_cov_21.268959 1189

NODE_1123_length_1188_cov_1.548102 1188

NODE_1124_length_1188_cov_1.296558 1188

NODE_1125_length_1187_cov_1.687279 1187

NODE_1126_length_1186_cov_78.209549 1186

NODE_1127_length_1180_cov_2.470222 1180

NODE_1128_length_1180_cov_1.400000 1180

NODE_1129_length_1178_cov_12.075690 1178

NODE_1130_length_1178_cov_1.576135 1178

NODE_1131_length_1178_cov_1.326803 1178

NODE_1132_length_1175_cov_60.936607 1175

NODE_1133_length_1175_cov_8.615179 1175

NODE_1134_length_1175_cov_2.171429 1175

NODE_1135_length_1174_cov_743.276139 1174

NODE_1136_length_1170_cov_1.775785 1170

NODE_1137_length_1169_cov_1.634650 1169

NODE_1138_length_1168_cov_1.729560 1168

NODE_1139_length_1165_cov_1.581081 1165

NODE_1140_length_1164_cov_2.139766 1164

NODE_1141_length_1164_cov_1.420198 1164

NODE_1142_length_1163_cov_254.489170 1163

NODE_1143_length_1162_cov_2.590786 1162

NODE_1144_length_1161_cov_1.636528 1161

NODE_1145_length_1160_cov_2.437104 1160

NODE_1146_length_1158_cov_1.656392 1158

NODE_1147_length_1152_cov_2.528715 1152

NODE_1148_length_1147_cov_2.808608 1147

NODE_1149_length_1147_cov_2.081502 1147

NODE_1150_length_1146_cov_1.484876 1146

NODE_1151_length_1142_cov_2.678013 1142

NODE_1152_length_1140_cov_117.281106 1140

NODE_1153_length_1137_cov_2.124769 1137

NODE_1154_length_1135_cov_2.361111 1135

NODE_1155_length_1135_cov_2.127778 1135

NODE_1156_length_1132_cov_2.094708 1132

NODE_1157_length_1132_cov_1.417827 1132

NODE_1158_length_1132_cov_1.416899 1132

NODE_1159_length_1130_cov_1.298605 1130

NODE_1160_length_1128_cov_2.503262 1128

NODE_1161_length_1126_cov_53.079365 1126

NODE_1162_length_1125_cov_62.600000 1125

NODE_1163_length_1125_cov_1.471028 1125

NODE_1164_length_1124_cov_2.098223 1124

NODE_1165_length_1124_cov_1.832554 1124

NODE_1166_length_1122_cov_1.918463 1122

NODE_1167_length_1120_cov_32.778404 1120

NODE_1168_length_1117_cov_1.555556 1117

NODE_1169_length_1116_cov_2.357210 1116

NODE_1170_length_1115_cov_1.752830 1115

NODE_1171_length_1115_cov_1.601887 1115

NODE_1172_length_1114_cov_29.446648 1114

NODE_1173_length_1114_cov_1.752597 1114

NODE_1174_length_1113_cov_1.616257 1113

NODE_1175_length_1113_cov_1.536862 1113

NODE_1176_length_1112_cov_2.719962 1112

NODE_1177_length_1111_cov_1.491477 1111

NODE_1178_length_1110_cov_1077.304265 1110

NODE_1179_length_1110_cov_2.098578 1110

NODE_1180_length_1109_cov_1.348197 1109

NODE_1181_length_1108_cov_1.553656 1108

NODE_1182_length_1106_cov_2143.365366 1106

NODE_1183_length_1106_cov_1.327307 1106

NODE_1184_length_1102_cov_2.350525 1102

NODE_1185_length_1102_cov_1.590258 1102

NODE_1186_length_1099_cov_95.146552 1099

NODE_1187_length_1097_cov_1.748560 1097

NODE_1188_length_1097_cov_1.554702 1097

NODE_1189_length_1095_cov_2.069231 1095

NODE_1190_length_1093_cov_1.649326 1093

NODE_1191_length_1092_cov_1.779171 1092

NODE_1192_length_1091_cov_574.478764 1091

NODE_1193_length_1091_cov_1.607143 1091

NODE_1194_length_1089_cov_1.783366 1089

NODE_1195_length_1087_cov_1.548450 1087

NODE_1196_length_1086_cov_11.777886 1086

NODE_1197_length_1083_cov_1.182879 1083

NODE_1198_length_1078_cov_106.933529 1078

NODE_1199_length_1078_cov_1.672532 1078

NODE_1200_length_1074_cov_2.829244 1074

NODE_1201_length_1073_cov_1.281925 1073

NODE_1202_length_1071_cov_4.018701 1071

NODE_1203_length_1071_cov_1.904528 1071

NODE_1204_length_1070_cov_145.286700 1070

NODE_1205_length_1070_cov_2.952709 1070

NODE_1206_length_1070_cov_1.562562 1070

NODE_1207_length_1069_cov_25.390533 1069

NODE_1208_length_1068_cov_1.599210 1068

NODE_1209_length_1067_cov_1.378458 1067

NODE_1210_length_1066_cov_2.047478 1066

NODE_1211_length_1065_cov_1301.746535 1065

NODE_1212_length_1065_cov_2.192079 1065

NODE_1213_length_1065_cov_1.782178 1065

NODE_1214_length_1064_cov_2.865213 1064

NODE_1215_length_1062_cov_1.963257 1062

NODE_1216_length_1061_cov_527.506958 1061

NODE_1217_length_1061_cov_1.571571 1061

NODE_1218_length_1056_cov_1.798202 1056

NODE_1219_length_1056_cov_1.781219 1056

NODE_1220_length_1056_cov_1.340659 1056

NODE_1221_length_1053_cov_2.149299 1053

NODE_1222_length_1052_cov_40.215647 1052

NODE_1223_length_1051_cov_2.589357 1051

NODE_1224_length_1050_cov_139.512563 1050

NODE_1225_length_1050_cov_13.831156 1050

NODE_1226_length_1050_cov_1.989950 1050

NODE_1227_length_1049_cov_2.444668 1049

NODE_1228_length_1048_cov_28.800604 1048

NODE_1229_length_1046_cov_2.312815 1046

NODE_1230_length_1046_cov_1.453078 1046

NODE_1231_length_1043_cov_1.708502 1043

NODE_1232_length_1042_cov_1.357649 1042

NODE_1233_length_1041_cov_1.458418 1041

NODE_1234_length_1040_cov_66.680203 1040

NODE_1235_length_1040_cov_1.827411 1040

NODE_1236_length_1039_cov_1.404472 1039

NODE_1237_length_1038_cov_23.574771 1038

NODE_1238_length_1036_cov_1.447503 1036

NODE_1239_length_1034_cov_1.922370 1034

NODE_1240_length_1032_cov_1.991812 1032

NODE_1241_length_1032_cov_1.842375 1032

NODE_1242_length_1031_cov_1.520492 1031

NODE_1243_length_1031_cov_1.231557 1031

NODE_1244_length_1030_cov_1.753846 1030

NODE_1245_length_1028_cov_1.849949 1028

NODE_1246_length_1027_cov_1.342593 1027

NODE_1247_length_1026_cov_24.279094 1026

NODE_1248_length_1025_cov_2.386598 1025

NODE_1249_length_1025_cov_1.798969 1025

NODE_1250_length_1024_cov_1.435501 1024

NODE_1251_length_1023_cov_1.480372 1023

NODE_1252_length_1022_cov_1.582213 1022

NODE_1253_length_1019_cov_1.960581 1019

NODE_1254_length_1019_cov_1.549793 1019

NODE_1255_length_1019_cov_1.248963 1019

NODE_1256_length_1018_cov_145.682243 1018

NODE_1257_length_1018_cov_1.454829 1018

NODE_1258_length_1017_cov_2.146570 1017

NODE_1259_length_1017_cov_1.535343 1017

NODE_1260_length_1015_cov_27.459375 1015

NODE_1261_length_1011_cov_125.940377 1011

NODE_1262_length_1011_cov_1.760460 1011

NODE_1263_length_1011_cov_1.741632 1011

NODE_1264_length_1011_cov_1.438285 1011

NODE_1265_length_1010_cov_18.593717 1010

NODE_1266_length_1006_cov_22.763407 1006

NODE_1267_length_1005_cov_1.278947 1005

NODE_1268_length_1004_cov_4.257113 1004

NODE_1269_length_1003_cov_1.518987 1003

NODE_1270_length_1002_cov_37.360084 1002

NODE_1271_length_1001_cov_1.379493 1001

NODE_1272_length_999_cov_5.799788 999

NODE_1273_length_998_cov_1.671262 998

NODE_1274_length_995_cov_1.436170 995

NODE_1275_length_994_cov_105.714590 994

NODE_1276_length_992_cov_1.740662 992

NODE_1277_length_991_cov_1.887821 991

NODE_1278_length_991_cov_1.664530 991

NODE_1279_length_986_cov_1.643394 986

NODE_1280_length_986_cov_1.124597 986

NODE_1281_length_985_cov_1.215054 985

NODE_1282_length_984_cov_1.889128 984

NODE_1283_length_984_cov_1.644779 984

NODE_1284_length_983_cov_1.659483 983

NODE_1285_length_982_cov_9.072276 982

NODE_1286_length_982_cov_1.353830 982

NODE_1287_length_981_cov_59.385529 981

NODE_1288_length_980_cov_1.699459 980

NODE_1289_length_979_cov_2.984848 979

NODE_1290_length_979_cov_1.639610 979

NODE_1291_length_977_cov_4.296095 977

NODE_1292_length_977_cov_1.439262 977

NODE_1293_length_976_cov_3.868621 976

NODE_1294_length_976_cov_1.541802 976

NODE_1295_length_975_cov_65.396739 975

NODE_1296_length_975_cov_1.744565 975

NODE_1297_length_973_cov_0.957516 973

NODE_1298_length_972_cov_1.580153 972

NODE_1299_length_972_cov_1.420938 972

NODE_1300_length_971_cov_111.144105 971

NODE_1301_length_971_cov_30.760917 971

NODE_1302_length_971_cov_1.693231 971

NODE_1303_length_969_cov_1.274617 969

NODE_1304_length_969_cov_1.154267 969

NODE_1305_length_966_cov_1.647640 966

NODE_1306_length_965_cov_2.421978 965

NODE_1307_length_965_cov_1.483516 965

NODE_1308_length_965_cov_1.173626 965

NODE_1309_length_963_cov_92.332599 963

NODE_1310_length_962_cov_90.170893 962

NODE_1311_length_962_cov_1.637266 962

NODE_1312_length_962_cov_1.587652 962

NODE_1313_length_961_cov_1.788079 961

NODE_1314_length_960_cov_11.538122 960

NODE_1315_length_959_cov_3.022124 959

NODE_1316_length_957_cov_2.171840 957

NODE_1317_length_957_cov_1.828160 957

NODE_1318_length_956_cov_1.593785 956

NODE_1319_length_954_cov_5563.611791 954

NODE_1320_length_954_cov_122.443826 954

NODE_1321_length_953_cov_1.397550 953

NODE_1322_length_952_cov_1.604236 952

NODE_1323_length_952_cov_1.576366 952

NODE_1324_length_950_cov_1.654749 950

NODE_1325_length_950_cov_1.497207 950

NODE_1326_length_950_cov_1.426816 950

NODE_1327_length_949_cov_156.794183 949

NODE_1328_length_949_cov_2.854586 949

NODE_1329_length_949_cov_2.398210 949

NODE_1330_length_949_cov_1.812081 949

NODE_1331_length_948_cov_26.857783 948

NODE_1332_length_947_cov_1.270179 947

NODE_1333_length_946_cov_3.042649 946

NODE_1334_length_946_cov_1.939394 946

NODE_1335_length_943_cov_1.215090 943

NODE_1336_length_943_cov_1.154279 943

NODE_1337_length_942_cov_1.691094 942

NODE_1338_length_942_cov_1.614431 942

NODE_1339_length_941_cov_1.725734 941

NODE_1340_length_940_cov_2.135593 940

NODE_1341_length_939_cov_82.679864 939

NODE_1342_length_939_cov_57.093891 939

NODE_1343_length_937_cov_1.326531 937

NODE_1344_length_936_cov_1.889898 936

NODE_1345_length_935_cov_2.045455 935

NODE_1346_length_935_cov_1.482955 935

NODE_1347_length_931_cov_79.020548 931

NODE_1348_length_931_cov_1.489726 931

NODE_1349_length_930_cov_1.512000 930

NODE_1350_length_930_cov_1.491429 930

NODE_1351_length_930_cov_1.234286 930

NODE_1352_length_930_cov_1.131429 930

NODE_1353_length_929_cov_1.337529 929

NODE_1354_length_927_cov_1.447248 927

NODE_1355_length_927_cov_1.290138 927

NODE_1356_length_926_cov_1.394948 926

NODE_1357_length_925_cov_21.409195 925

NODE_1358_length_925_cov_1.396552 925

NODE_1359_length_924_cov_2.365938 924

NODE_1360_length_923_cov_157.320276 923

NODE_1361_length_923_cov_1.707373 923

NODE_1362_length_923_cov_1.599078 923

NODE_1363_length_919_cov_1.322917 919

NODE_1364_length_918_cov_2.196987 918

NODE_1365_length_918_cov_1.825029 918

NODE_1366_length_918_cov_1.460023 918

NODE_1367_length_917_cov_1.877030 917

NODE_1368_length_916_cov_33.500581 916

NODE_1369_length_914_cov_1.345751 914

NODE_1370_length_914_cov_1.324796 914

NODE_1371_length_913_cov_1.543124 913

NODE_1372_length_912_cov_2452.830805 912

NODE_1373_length_912_cov_10.329055 912

NODE_1374_length_912_cov_1.470245 912

NODE_1375_length_912_cov_1.199533 912

NODE_1376_length_911_cov_1.617991 911

NODE_1377_length_909_cov_1.977752 909

NODE_1378_length_908_cov_1.871043 908

NODE_1379_length_907_cov_9.484742 907

NODE_1380_length_907_cov_6.252347 907

NODE_1381_length_907_cov_1.841549 907

NODE_1382_length_907_cov_1.827465 907

NODE_1383_length_907_cov_1.565728 907

NODE_1384_length_906_cov_37.064630 906

NODE_1385_length_905_cov_2.175294 905

NODE_1386_length_905_cov_2.041176 905

NODE_1387_length_904_cov_1.773852 904

NODE_1388_length_904_cov_1.726737 904

NODE_1389_length_903_cov_1.630896 903

NODE_1390_length_902_cov_24.430933 902

NODE_1391_length_902_cov_3.318772 902

NODE_1392_length_902_cov_1.700118 902

NODE_1393_length_901_cov_1.489362 901

NODE_1394_length_900_cov_20.448521 900

NODE_1395_length_899_cov_1.998815 899

NODE_1396_length_898_cov_1.565836 898

NODE_1397_length_897_cov_1.870546 897

NODE_1398_length_897_cov_1.549881 897

NODE_1399_length_895_cov_319.330952 895

NODE_1400_length_895_cov_1.607143 895

NODE_1401_length_895_cov_1.392857 895

NODE_1402_length_894_cov_2.411204 894

NODE_1403_length_893_cov_1260.575179 893

NODE_1404_length_893_cov_1.674224 893

NODE_1405_length_892_cov_1.397849 892

NODE_1406_length_890_cov_1.670659 890

NODE_1407_length_889_cov_8.244604 889

NODE_1408_length_889_cov_1.348921 889

NODE_1409_length_886_cov_1723.469314 886

NODE_1410_length_885_cov_1.680723 885

NODE_1411_length_883_cov_1.312802 883

NODE_1412_length_882_cov_160.535671 882

NODE_1413_length_881_cov_278.859564 881

NODE_1414_length_881_cov_2.000000 881

NODE_1415_length_880_cov_1.785455 880

NODE_1416_length_880_cov_1.298182 880

NODE_1417_length_877_cov_2.352798 877

NODE_1418_length_877_cov_1.925791 877

NODE_1419_length_876_cov_1.863581 876

NODE_1420_length_876_cov_1.808770 876

NODE_1421_length_873_cov_1.980440 873

NODE_1422_length_873_cov_1.441320 873

NODE_1423_length_872_cov_1.826193 872

NODE_1424_length_870_cov_1.476074 870

NODE_1425_length_870_cov_1.089571 870

NODE_1426_length_868_cov_27.699877 868

NODE_1427_length_868_cov_1.677737 868

NODE_1428_length_866_cov_2.113440 866

NODE_1429_length_865_cov_33.253086 865

NODE_1430_length_865_cov_1.630864 865

NODE_1431_length_865_cov_1.538272 865

NODE_1432_length_864_cov_21.149567 864

NODE_1433_length_864_cov_1.868974 864

NODE_1434_length_864_cov_1.488257 864

NODE_1435_length_864_cov_1.414091 864

NODE_1436_length_864_cov_1.103832 864

NODE_1437_length_863_cov_1.461634 863

NODE_1438_length_861_cov_2.251861 861

NODE_1439_length_861_cov_1.703474 861

NODE_1440_length_861_cov_1.444169 861

NODE_1441_length_861_cov_1.264268 861

NODE_1442_length_860_cov_3145.575155 860

NODE_1443_length_860_cov_93.885714 860

NODE_1444_length_860_cov_1.607453 860

NODE_1445_length_858_cov_33.628892 858

NODE_1446_length_858_cov_1.554172 858

NODE_1447_length_857_cov_33.000000 857

NODE_1448_length_857_cov_2.502494 857

NODE_1449_length_857_cov_1.290524 857

NODE_1450_length_856_cov_1.176030 856

NODE_1451_length_854_cov_4.204005 854

NODE_1452_length_854_cov_1.679599 854

NODE_1453_length_853_cov_1.136591 853

NODE_1454_length_852_cov_47.937265 852

NODE_1455_length_852_cov_1.468005 852

NODE_1456_length_851_cov_2.016332 851

NODE_1457_length_851_cov_1.614322 851

NODE_1458_length_849_cov_1.891688 849

NODE_1459_length_849_cov_1.697733 849

NODE_1460_length_848_cov_2.654477 848

NODE_1461_length_848_cov_1.958386 848

NODE_1462_length_848_cov_1.735183 848

NODE_1463_length_848_cov_1.479193 848

NODE_1464_length_847_cov_1.238636 847

NODE_1465_length_846_cov_1.312263 846

NODE_1466_length_846_cov_1.308470 846

NODE_1467_length_846_cov_1.118837 846

NODE_1468_length_845_cov_3.149367 845

NODE_1469_length_844_cov_1.386565 844

NODE_1470_length_843_cov_1.965736 843

NODE_1471_length_842_cov_2.886912 842

NODE_1472_length_842_cov_2.335451 842

NODE_1473_length_841_cov_850.977099 841

NODE_1474_length_841_cov_30.033079 841

NODE_1475_length_840_cov_2.698089 840

NODE_1476_length_839_cov_1.501276 839

NODE_1477_length_838_cov_1.494253 838

NODE_1478_length_837_cov_2.049872 837

NODE_1479_length_837_cov_1.704604 837

NODE_1480_length_837_cov_1.282609 837

NODE_1481_length_836_cov_36.221511 836

NODE_1482_length_835_cov_1.765385 835

NODE_1483_length_835_cov_1.480769 835

NODE_1484_length_833_cov_2.429306 833

NODE_1485_length_833_cov_1.214653 833

NODE_1486_length_832_cov_3.711712 832

NODE_1487_length_831_cov_1.681701 831

NODE_1488_length_831_cov_1.333763 831

NODE_1489_length_831_cov_1.159794 831

NODE_1490_length_830_cov_16.200000 830

NODE_1491_length_830_cov_2.818065 830

NODE_1492_length_830_cov_2.032258 830

NODE_1493_length_830_cov_1.540645 830

NODE_1494_length_829_cov_1.626615 829

NODE_1495_length_829_cov_1.538760 829

NODE_1496_length_829_cov_1.337209 829

NODE_1497_length_829_cov_1.319121 829

NODE_1498_length_826_cov_107.038911 826

NODE_1499_length_825_cov_1.723377 825

NODE_1500_length_824_cov_1.747724 824

NODE_1501_length_824_cov_1.682705 824

NODE_1502_length_824_cov_1.390117 824

NODE_1503_length_823_cov_2.787760 823

NODE_1504_length_823_cov_1.399740 823

NODE_1505_length_821_cov_3.093995 821

NODE_1506_length_820_cov_2.163399 820

NODE_1507_length_820_cov_1.411765 820

NODE_1508_length_819_cov_1.650524 819

NODE_1509_length_818_cov_1.592398 818

NODE_1510_length_818_cov_1.280472 818

NODE_1511_length_816_cov_142.040736 816

NODE_1512_length_816_cov_1.419185 816

NODE_1513_length_815_cov_14.319737 815

NODE_1514_length_815_cov_1.776316 815

NODE_1515_length_815_cov_1.351316 815

NODE_1516_length_814_cov_1.600791 814

NODE_1517_length_813_cov_8.912929 813

NODE_1518_length_812_cov_15.011889 812

NODE_1519_length_812_cov_7.969617 812

NODE_1520_length_812_cov_2.140026 812

NODE_1521_length_812_cov_1.367239 812

NODE_1522_length_811_cov_1.588624 811

NODE_1523_length_810_cov_1.480795 810

NODE_1524_length_809_cov_2.623342 809

NODE_1525_length_808_cov_3506.378486 808

NODE_1526_length_808_cov_2.075697 808

NODE_1527_length_808_cov_1.398406 808

NODE_1528_length_808_cov_1.314741 808

NODE_1529_length_807_cov_1.795213 807

NODE_1530_length_806_cov_1.332889 806

NODE_1531_length_806_cov_1.318242 806

NODE_1532_length_804_cov_2.020027 804

NODE_1533_length_803_cov_140.097594 803

NODE_1534_length_802_cov_1.413655 802

NODE_1535_length_801_cov_2.156836 801

NODE_1536_length_799_cov_1.935484 799

NODE_1537_length_798_cov_1.506057 798

NODE_1538_length_798_cov_1.453567 798

NODE_1539_length_797_cov_1.495957 797

NODE_1540_length_796_cov_1.974359 796

NODE_1541_length_795_cov_61.329730 795

NODE_1542_length_793_cov_38.616531 793

NODE_1543_length_793_cov_1.371274 793

NODE_1544_length_793_cov_1.341463 793

NODE_1545_length_791_cov_2.861413 791

NODE_1546_length_791_cov_1.759511 791

NODE_1547_length_790_cov_1.653061 790

NODE_1548_length_789_cov_1.153951 789

NODE_1549_length_786_cov_2.102599 786

NODE_1550_length_784_cov_1.776406 784

NODE_1551_length_783_cov_1.671703 783

NODE_1552_length_783_cov_1.574176 783

NODE_1553_length_783_cov_1.483516 783

NODE_1554_length_782_cov_2.537827 782

NODE_1555_length_782_cov_1.353508 782

NODE_1556_length_781_cov_1.519284 781

NODE_1557_length_780_cov_34.833103 780

NODE_1558_length_780_cov_1.965517 780

NODE_1559_length_780_cov_1.532414 780

NODE_1560_length_780_cov_1.489655 780

NODE_1561_length_780_cov_1.433103 780

NODE_1562_length_780_cov_1.117241 780

NODE_1563_length_780_cov_1.117241 780

NODE_1564_length_776_cov_1.621359 776

NODE_1565_length_776_cov_1.535368 776

NODE_1566_length_776_cov_1.424411 776

NODE_1567_length_775_cov_1.951389 775

NODE_1568_length_775_cov_1.781944 775

NODE_1569_length_775_cov_1.497222 775

NODE_1570_length_773_cov_1.814763 773

NODE_1571_length_772_cov_1.443515 772

NODE_1572_length_772_cov_1.380753 772

NODE_1573_length_771_cov_1.291899 771

NODE_1574_length_770_cov_2.372028 770

NODE_1575_length_770_cov_1.888112 770

NODE_1576_length_770_cov_1.447552 770

NODE_1577_length_770_cov_1.222378 770

NODE_1578_length_769_cov_3.350140 769

NODE_1579_length_769_cov_1.700280 769

NODE_1580_length_766_cov_1.751055 766

NODE_1581_length_765_cov_1.733803 765

NODE_1582_length_765_cov_1.584507 765

NODE_1583_length_764_cov_21.956276 764

NODE_1584_length_764_cov_1.954866 764

NODE_1585_length_764_cov_1.610719 764

NODE_1586_length_764_cov_1.324401 764

NODE_1587_length_761_cov_1.834278 761

NODE_1588_length_761_cov_1.814448 761

NODE_1589_length_761_cov_1.466006 761

NODE_1590_length_760_cov_1.948936 760

NODE_1591_length_760_cov_1.787234 760

NODE_1592_length_760_cov_1.723404 760

NODE_1593_length_760_cov_1.514894 760

NODE_1594_length_759_cov_9.238636 759

NODE_1595_length_758_cov_2.234708 758

NODE_1596_length_758_cov_1.726885 758

NODE_1597_length_757_cov_32.273504 757

NODE_1598_length_757_cov_1.700855 757

NODE_1599_length_757_cov_1.346154 757

NODE_1600_length_756_cov_3.135521 756

NODE_1601_length_756_cov_1.669044 756

NODE_1602_length_756_cov_1.540656 756

NODE_1603_length_756_cov_1.104137 756

NODE_1604_length_755_cov_2.338571 755

NODE_1605_length_754_cov_1.412017 754

NODE_1606_length_753_cov_1.095989 753

NODE_1607_length_752_cov_2.177905 752

NODE_1608_length_752_cov_2.065997 752

NODE_1609_length_752_cov_1.150646 752

NODE_1610_length_751_cov_2.067529 751

NODE_1611_length_750_cov_1.421583 750

NODE_1612_length_750_cov_1.294964 750

NODE_1613_length_750_cov_1.233094 750

NODE_1614_length_749_cov_92.832853 749

NODE_1615_length_749_cov_4.938040 749

NODE_1616_length_749_cov_2.093660 749

NODE_1617_length_749_cov_1.945245 749

NODE_1618_length_749_cov_1.945245 749

NODE_1619_length_748_cov_2.626263 748

NODE_1620_length_748_cov_1.493506 748

NODE_1621_length_748_cov_1.391053 748

NODE_1622_length_748_cov_1.189033 748

NODE_1623_length_747_cov_1.686416 747

NODE_1624_length_747_cov_1.460983 747

NODE_1625_length_747_cov_1.430636 747

NODE_1626_length_746_cov_1.665702 746

NODE_1627_length_746_cov_1.131693 746

NODE_1628_length_745_cov_1.891304 745

NODE_1629_length_745_cov_1.565217 745

NODE_1630_length_745_cov_1.434783 745

NODE_1631_length_745_cov_1.339130 745

NODE_1632_length_745_cov_1.173913 745

NODE_1633_length_745_cov_1.040580 745

NODE_1634_length_743_cov_1.300872 743

NODE_1635_length_742_cov_122.662300 742

NODE_1636_length_742_cov_1.537118 742

NODE_1637_length_741_cov_8.909621 741

NODE_1638_length_739_cov_2.763158 739

NODE_1639_length_738_cov_130.152269 738

NODE_1640_length_738_cov_1.603221 738

NODE_1641_length_738_cov_1.581259 738

NODE_1642_length_736_cov_1.453744 736

NODE_1643_length_735_cov_1.585294 735

NODE_1644_length_734_cov_22.964654 734

NODE_1645_length_734_cov_1.921944 734

NODE_1646_length_734_cov_1.830633 734

NODE_1647_length_734_cov_1.664212 734

NODE_1648_length_734_cov_1.656848 734

NODE_1649_length_733_cov_1.659292 733

NODE_1650_length_733_cov_1.548673 733

NODE_1651_length_733_cov_1.541298 733

NODE_1652_length_733_cov_1.327434 733

NODE_1653_length_733_cov_1.261062 733

NODE_1654_length_731_cov_1.701183 731

NODE_1655_length_730_cov_1.600000 730

NODE_1656_length_730_cov_1.503704 730

NODE_1657_length_730_cov_1.237037 730

NODE_1658_length_730_cov_1.000000 730

NODE_1659_length_729_cov_1.701780 729

NODE_1660_length_729_cov_1.402077 729

NODE_1661_length_728_cov_2.219911 728

NODE_1662_length_728_cov_2.005944 728

NODE_1663_length_728_cov_1.872214 728

NODE_1664_length_728_cov_1.855869 728

NODE_1665_length_728_cov_1.515602 728

NODE_1666_length_728_cov_1.270431 728

NODE_1667_length_728_cov_1.123328 728

NODE_1668_length_727_cov_82.799107 727

NODE_1669_length_724_cov_31.550075 724

NODE_1670_length_724_cov_1.278027 724

NODE_1671_length_722_cov_2.005997 722

NODE_1672_length_722_cov_1.772114 722

NODE_1673_length_722_cov_1.715142 722

NODE_1674_length_721_cov_2.073574 721

NODE_1675_length_721_cov_2.027027 721

NODE_1676_length_720_cov_1.639098 720

NODE_1677_length_718_cov_1.131222 718

NODE_1678_length_717_cov_11.146526 717

NODE_1679_length_717_cov_4.007553 717

NODE_1680_length_717_cov_1.404834 717

NODE_1681_length_716_cov_1.701967 716

NODE_1682_length_716_cov_1.496218 716

NODE_1683_length_714_cov_1.544765 714

NODE_1684_length_714_cov_1.210926 714

NODE_1685_length_713_cov_1.504559 713

NODE_1686_length_712_cov_1.680365 712

NODE_1687_length_712_cov_1.575342 712

NODE_1688_length_712_cov_1.438356 712

NODE_1689_length_711_cov_2.330793 711

NODE_1690_length_711_cov_1.371951 711

NODE_1691_length_710_cov_1.374046 710

NODE_1692_length_710_cov_1.305344 710

NODE_1693_length_709_cov_2.270642 709

NODE_1694_length_709_cov_1.655963 709

NODE_1695_length_708_cov_5.836141 708

NODE_1696_length_708_cov_2.747320 708

NODE_1697_length_708_cov_1.447167 708

NODE_1698_length_706_cov_1.589862 706

NODE_1699_length_706_cov_1.423963 706

NODE_1700_length_706_cov_1.313364 706

NODE_1701_length_703_cov_1.388889 703

NODE_1702_length_703_cov_1.337963 703

NODE_1703_length_702_cov_938.091190 702

NODE_1704_length_701_cov_1.741486 701

NODE_1705_length_701_cov_1.532508 701

NODE_1706_length_700_cov_795.190698 700

NODE_1707_length_700_cov_1.804651 700

NODE_1708_length_699_cov_1.187888 699

NODE_1709_length_699_cov_1.186335 699

NODE_1710_length_698_cov_74.763608 698

NODE_1711_length_698_cov_2.097978 698

NODE_1712_length_698_cov_1.819596 698

NODE_1713_length_696_cov_1.402496 696

NODE_1714_length_696_cov_1.090484 696

NODE_1715_length_696_cov_1.088924 696

NODE_1716_length_694_cov_1.521127 694

NODE_1717_length_693_cov_18.528213 693

NODE_1718_length_692_cov_1.583987 692

NODE_1719_length_691_cov_1.183962 691

NODE_1720_length_690_cov_129.477165 690

NODE_1721_length_689_cov_1.615142 689

NODE_1722_length_689_cov_1.354890 689

NODE_1723_length_688_cov_2381.793049 688

NODE_1724_length_688_cov_41.096367 688

NODE_1725_length_688_cov_1.484992 688

NODE_1726_length_687_cov_1.780063 687

NODE_1727_length_687_cov_1.650316 687

NODE_1728_length_687_cov_1.596519 687

NODE_1729_length_687_cov_1.311709 687

NODE_1730_length_686_cov_1.640254 686

NODE_1731_length_685_cov_1.779365 685

NODE_1732_length_685_cov_1.571429 685

NODE_1733_length_684_cov_1.414944 684

NODE_1734_length_684_cov_1.257552 684

NODE_1735_length_684_cov_1.216216 684

NODE_1736_length_683_cov_1143.813694 683

NODE_1737_length_683_cov_1.792994 683

NODE_1738_length_682_cov_1.649123 682

NODE_1739_length_681_cov_1.797125 681

NODE_1740_length_681_cov_1.468051 681

NODE_1741_length_680_cov_1.728000 680

NODE_1742_length_680_cov_1.296000 680

NODE_1743_length_680_cov_1.152000 680

NODE_1744_length_680_cov_1.073600 680

NODE_1745_length_679_cov_1.217949 679

NODE_1746_length_678_cov_914.937400 678

NODE_1747_length_678_cov_1.719101 678

NODE_1748_length_678_cov_1.516854 678

NODE_1749_length_677_cov_1.434084 677

NODE_1750_length_676_cov_2.423510 676

NODE_1751_length_676_cov_1.228663 676

NODE_1752_length_675_cov_2.540323 675

NODE_1753_length_675_cov_1.814516 675

NODE_1754_length_675_cov_1.741935 675

NODE_1755_length_675_cov_1.741935 675

NODE_1756_length_675_cov_1.279032 675

NODE_1757_length_675_cov_1.135484 675

NODE_1758_length_674_cov_1.308562 674

NODE_1759_length_673_cov_72.029126 673

NODE_1760_length_673_cov_1.375405 673

NODE_1761_length_672_cov_5.351702 672

NODE_1762_length_672_cov_1.823339 672

NODE_1763_length_672_cov_1.505673 672

NODE_1764_length_672_cov_1.163695 672

NODE_1765_length_671_cov_1.314935 671

NODE_1766_length_670_cov_2.422764 670

NODE_1767_length_670_cov_1.609756 670

NODE_1768_length_669_cov_33.995114 669

NODE_1769_length_669_cov_1.539088 669

NODE_1770_length_669_cov_1.392508 669

NODE_1771_length_669_cov_1.146580 669

NODE_1772_length_667_cov_1.911765 667

NODE_1773_length_667_cov_1.691176 667

NODE_1774_length_667_cov_1.544118 667

NODE_1775_length_666_cov_10.869067 666

NODE_1776_length_666_cov_1.708674 666

NODE_1777_length_666_cov_1.489362 666

NODE_1778_length_666_cov_1.435352 666

NODE_1779_length_665_cov_1.327869 665

NODE_1780_length_664_cov_1.594417 664

NODE_1781_length_664_cov_1.256158 664

NODE_1782_length_663_cov_1.332237 663

NODE_1783_length_663_cov_1.317434 663

NODE_1784_length_662_cov_1.556837 662

NODE_1785_length_661_cov_1.409241 661

NODE_1786_length_661_cov_1.358086 661

NODE_1787_length_661_cov_1.325083 661

NODE_1788_length_661_cov_1.080858 661

NODE_1789_length_660_cov_2.008264 660

NODE_1790_length_660_cov_1.636364 660

NODE_1791_length_660_cov_1.561983 660

NODE_1792_length_660_cov_0.940496 660

NODE_1793_length_659_cov_12.647351 659

NODE_1794_length_659_cov_1.341060 659

NODE_1795_length_658_cov_1.343284 658

NODE_1796_length_657_cov_1.719269 657

NODE_1797_length_657_cov_1.699336 657

NODE_1798_length_657_cov_1.089701 657

NODE_1799_length_656_cov_1.242928 656

NODE_1800_length_655_cov_1.408333 655

NODE_1801_length_655_cov_1.260000 655

NODE_1802_length_654_cov_44.360601 654

NODE_1803_length_654_cov_2.178631 654

NODE_1804_length_653_cov_1.456522 653

NODE_1805_length_652_cov_6.035176 652

NODE_1806_length_652_cov_1.582915 652

NODE_1807_length_651_cov_1.887584 651

NODE_1808_length_651_cov_1.434564 651

NODE_1809_length_651_cov_1.359060 651

NODE_1810_length_650_cov_2.015126 650

NODE_1811_length_650_cov_1.722689 650

NODE_1812_length_650_cov_1.568067 650

NODE_1813_length_650_cov_0.983193 650

NODE_1814_length_649_cov_1.580808 649

NODE_1815_length_649_cov_1.451178 649

NODE_1816_length_648_cov_1.947723 648

NODE_1817_length_648_cov_1.745363 648

NODE_1818_length_645_cov_1.822034 645

NODE_1819_length_645_cov_1.754237 645

NODE_1820_length_645_cov_1.201695 645

NODE_1821_length_644_cov_1.859083 644

NODE_1822_length_644_cov_1.745331 644

NODE_1823_length_644_cov_1.528014 644

NODE_1824_length_643_cov_101.401361 643

NODE_1825_length_643_cov_1.071429 643

NODE_1826_length_642_cov_1.916525 642

NODE_1827_length_641_cov_1.759386 641

NODE_1828_length_640_cov_1.868376 640

NODE_1829_length_640_cov_1.615385 640

NODE_1830_length_640_cov_1.615385 640

NODE_1831_length_640_cov_1.307692 640

NODE_1832_length_639_cov_1.849315 639

NODE_1833_length_639_cov_1.751712 639

NODE_1834_length_639_cov_1.309932 639

NODE_1835_length_638_cov_1.543739 638

NODE_1836_length_637_cov_2.319588 637

NODE_1837_length_637_cov_1.701031 637

NODE_1838_length_637_cov_1.484536 637

NODE_1839_length_637_cov_1.469072 637

NODE_1840_length_637_cov_1.180412 637

NODE_1841_length_636_cov_1.528399 636

NODE_1842_length_636_cov_1.444062 636

NODE_1843_length_636_cov_1.394148 636

NODE_1844_length_635_cov_1.706897 635

NODE_1845_length_635_cov_1.512069 635

NODE_1846_length_635_cov_1.451724 635

NODE_1847_length_635_cov_1.370690 635

NODE_1848_length_634_cov_1.616580 634

NODE_1849_length_634_cov_1.310881 634

NODE_1850_length_633_cov_2.865052 633

NODE_1851_length_633_cov_2.640138 633

NODE_1852_length_633_cov_2.024221 633

NODE_1853_length_633_cov_1.982699 633

NODE_1854_length_632_cov_2.322357 632

NODE_1855_length_632_cov_1.949740 632

NODE_1856_length_631_cov_17.359375 631

NODE_1857_length_631_cov_1.859375 631

NODE_1858_length_631_cov_1.769097 631

NODE_1859_length_631_cov_1.718750 631

NODE_1860_length_630_cov_1.631304 630

NODE_1861_length_630_cov_1.288696 630

NODE_1862_length_629_cov_1.489547 629

NODE_1863_length_628_cov_96.055846 628

NODE_1864_length_628_cov_51.399651 628

NODE_1865_length_628_cov_1.565445 628

NODE_1866_length_627_cov_1.337413 627

NODE_1867_length_627_cov_1.314685 627

NODE_1868_length_626_cov_1.548161 626

NODE_1869_length_626_cov_1.260946 626

NODE_1870_length_625_cov_1.733333 625

NODE_1871_length_625_cov_1.578947 625

NODE_1872_length_625_cov_1.578947 625

NODE_1873_length_625_cov_1.578947 625

NODE_1874_length_625_cov_1.256140 625

NODE_1875_length_624_cov_1.488576 624

NODE_1876_length_624_cov_0.905097 624

NODE_1877_length_623_cov_2.047535 623

NODE_1878_length_622_cov_1.666667 622

NODE_1879_length_621_cov_2.146643 621

NODE_1880_length_621_cov_2.065371 621

NODE_1881_length_621_cov_1.749117 621

NODE_1882_length_621_cov_1.351590 621

NODE_1883_length_621_cov_1.349823 621

NODE_1884_length_621_cov_1.275618 621

NODE_1885_length_620_cov_3097.274336 620

NODE_1886_length_620_cov_12.831858 620

NODE_1887_length_620_cov_1.497345 620

NODE_1888_length_619_cov_2.108156 619

NODE_1889_length_619_cov_1.326241 619

NODE_1890_length_618_cov_2.158082 618

NODE_1891_length_618_cov_1.811723 618

NODE_1892_length_618_cov_1.735346 618

NODE_1893_length_617_cov_1.761566 617

NODE_1894_length_617_cov_1.521352 617

NODE_1895_length_617_cov_1.462633 617

NODE_1896_length_617_cov_1.434164 617

NODE_1897_length_617_cov_1.361210 617

NODE_1898_length_615_cov_0.883929 615

NODE_1899_length_614_cov_48.078712 614

NODE_1900_length_614_cov_2.468694 614

NODE_1901_length_614_cov_1.932021 614

NODE_1902_length_613_cov_108.125448 613

NODE_1903_length_613_cov_39.732975 613

NODE_1904_length_613_cov_1.451613 613

NODE_1905_length_612_cov_1.919210 612

NODE_1906_length_612_cov_1.777379 612

NODE_1907_length_612_cov_1.373429 612

NODE_1908_length_612_cov_1.113106 612

NODE_1909_length_611_cov_27.976619 611

NODE_1910_length_611_cov_4.512590 611

NODE_1911_length_611_cov_1.859712 611

NODE_1912_length_611_cov_1.634892 611

NODE_1913_length_611_cov_1.456835 611

NODE_1914_length_611_cov_1.133094 611

NODE_1915_length_610_cov_1.488288 610

NODE_1916_length_610_cov_1.380180 610

NODE_1917_length_610_cov_1.354955 610

NODE_1918_length_609_cov_89.068592 609

NODE_1919_length_609_cov_2.274368 609

NODE_1920_length_609_cov_1.462094 609

NODE_1921_length_609_cov_1.380866 609

NODE_1922_length_609_cov_1.299639 609

NODE_1923_length_609_cov_1.055957 609

NODE_1924_length_609_cov_1.055957 609

NODE_1925_length_608_cov_1.627486 608

NODE_1926_length_607_cov_1.382246 607

NODE_1927_length_607_cov_0.978261 607

NODE_1928_length_606_cov_149.609800 606

NODE_1929_length_606_cov_2.117967 606

NODE_1930_length_606_cov_1.992740 606

NODE_1931_length_606_cov_1.878403 606

NODE_1932_length_606_cov_1.715064 606

NODE_1933_length_606_cov_0.970962 606

NODE_1934_length_605_cov_1.645455 605

NODE_1935_length_605_cov_1.530909 605

NODE_1936_length_605_cov_1.461818 605

NODE_1937_length_605_cov_1.309091 605

NODE_1938_length_604_cov_1.885246 604

NODE_1939_length_604_cov_1.786885 604

NODE_1940_length_604_cov_1.553734 604

NODE_1941_length_603_cov_106.614964 603

NODE_1942_length_603_cov_1.965328 603

NODE_1943_length_603_cov_1.806569 603

NODE_1944_length_603_cov_1.395985 603

NODE_1945_length_602_cov_162.495430 602

NODE_1946_length_602_cov_1.791590 602

NODE_1947_length_602_cov_1.667276 602

NODE_1948_length_602_cov_1.528336 602

NODE_1949_length_600_cov_1.814679 600

NODE_1950_length_600_cov_1.568807 600

NODE_1951_length_600_cov_1.238532 600

NODE_1952_length_599_cov_1.777574 599

NODE_1953_length_599_cov_1.465074 599

NODE_1954_length_599_cov_1.148897 599

NODE_1955_length_598_cov_1.325967 598

NODE_1956_length_597_cov_4.073801 597

NODE_1957_length_597_cov_1.926199 597

NODE_1958_length_597_cov_1.614391 597

NODE_1959_length_597_cov_1.577491 597

NODE_1960_length_597_cov_1.212177 597

NODE_1961_length_596_cov_1.913124 596

NODE_1962_length_596_cov_1.746765 596

NODE_1963_length_596_cov_1.709797 596

NODE_1964_length_596_cov_1.497227 596

NODE_1965_length_596_cov_1.482440 596

NODE_1966_length_596_cov_1.471349 596

NODE_1967_length_596_cov_1.247689 596

NODE_1968_length_595_cov_1.750000 595

NODE_1969_length_594_cov_26.840445 594

NODE_1970_length_594_cov_1.669759 594

NODE_1971_length_594_cov_1.437848 594

NODE_1972_length_594_cov_1.333952 594

NODE_1973_length_594_cov_1.001855 594

NODE_1974_length_593_cov_1.596654 593

NODE_1975_length_593_cov_1.494424 593

NODE_1976_length_593_cov_1.338290 593

NODE_1977_length_592_cov_4.985102 592

NODE_1978_length_592_cov_1.672253 592

NODE_1979_length_592_cov_1.290503 592

NODE_1980_length_592_cov_1.256983 592

NODE_1981_length_592_cov_1.173184 592

NODE_1982_length_592_cov_1.156425 592

NODE_1983_length_591_cov_2.893657 591

NODE_1984_length_591_cov_1.679104 591

NODE_1985_length_591_cov_1.481343 591

NODE_1986_length_591_cov_1.382463 591

NODE_1987_length_590_cov_1.766355 590

NODE_1988_length_590_cov_1.594393 590

NODE_1989_length_590_cov_1.080374 590

NODE_1990_length_589_cov_82.500000 589

NODE_1991_length_589_cov_1.597378 589

NODE_1992_length_589_cov_1.348315 589

NODE_1993_length_588_cov_3.275797 588

NODE_1994_length_588_cov_2.110694 588

NODE_1995_length_588_cov_1.266417 588

NODE_1996_length_588_cov_1.024390 588

NODE_1997_length_588_cov_1.013133 588

NODE_1998_length_587_cov_2.368421 587

NODE_1999_length_587_cov_2.368421 587

NODE_2000_length_586_cov_22.075330 586

NODE_2001_length_586_cov_1.563089 586

NODE_2002_length_586_cov_1.549906 586

NODE_2003_length_585_cov_1.837736 585

NODE_2004_length_584_cov_1.786389 584

NODE_2005_length_584_cov_1.601134 584

NODE_2006_length_583_cov_1.507576 583

NODE_2007_length_583_cov_1.009470 583

NODE_2008_length_582_cov_1.963947 582

NODE_2009_length_580_cov_51.476190 580

NODE_2010_length_578_cov_1.455067 578

NODE_2011_length_578_cov_1.204589 578

NODE_2012_length_577_cov_1.291188 577

NODE_2013_length_577_cov_1.262452 577

NODE_2014_length_577_cov_1.258621 577

NODE_2015_length_576_cov_1880.251440 576

NODE_2016_length_576_cov_1.554702 576

NODE_2017_length_576_cov_1.381958 576

NODE_2018_length_575_cov_33.444231 575

NODE_2019_length_575_cov_11.515385 575

NODE_2020_length_575_cov_1.803846 575

NODE_2021_length_575_cov_1.282692 575

NODE_2022_length_575_cov_1.111538 575

NODE_2023_length_575_cov_1.038462 575

NODE_2024_length_574_cov_40.138728 574

NODE_2025_length_574_cov_2.601156 574

NODE_2026_length_574_cov_1.730250 574

NODE_2027_length_574_cov_1.385356 574

NODE_2028_length_573_cov_1.608108 573

NODE_2029_length_573_cov_1.411197 573

NODE_2030_length_573_cov_0.874517 573

NODE_2031_length_572_cov_1.392650 572

NODE_2032_length_572_cov_1.392650 572

NODE_2033_length_572_cov_1.232108 572

NODE_2034_length_572_cov_0.957447 572

NODE_2035_length_570_cov_1.623301 570

NODE_2036_length_570_cov_1.166990 570

NODE_2037_length_569_cov_3.132296 569

NODE_2038_length_569_cov_2.647860 569

NODE_2039_length_569_cov_1.731518 569

NODE_2040_length_569_cov_1.313230 569

NODE_2041_length_567_cov_1.798828 567

NODE_2042_length_567_cov_0.878906 567

NODE_2043_length_566_cov_1.320939 566

NODE_2044_length_566_cov_1.056751 566

NODE_2045_length_565_cov_5176.068627 565

NODE_2046_length_565_cov_282.303922 565

NODE_2047_length_565_cov_2.294118 565

NODE_2048_length_565_cov_2.205882 565

NODE_2049_length_565_cov_1.478431 565

NODE_2050_length_564_cov_1.363458 564

NODE_2051_length_564_cov_1.357564 564

NODE_2052_length_564_cov_1.326130 564

NODE_2053_length_564_cov_1.257367 564

NODE_2054_length_564_cov_1.060904 564

NODE_2055_length_564_cov_1.060904 564

NODE_2056_length_564_cov_1.033399 564

NODE_2057_length_563_cov_2.125984 563

NODE_2058_length_563_cov_1.860236 563

NODE_2059_length_563_cov_1.190945 563

NODE_2060_length_563_cov_1.118110 563

NODE_2061_length_562_cov_1.857988 562

NODE_2062_length_562_cov_1.556213 562

NODE_2063_length_562_cov_1.153846 562

NODE_2064_length_561_cov_1.857708 561

NODE_2065_length_561_cov_1.600791 561

NODE_2066_length_561_cov_1.407115 561

NODE_2067_length_561_cov_1.333992 561

NODE_2068_length_561_cov_1.231225 561

NODE_2069_length_561_cov_1.156126 561

NODE_2070_length_561_cov_1.067194 561

NODE_2071_length_560_cov_29.855446 560

NODE_2072_length_560_cov_2.401980 560

NODE_2073_length_560_cov_1.667327 560

NODE_2074_length_560_cov_1.617822 560

NODE_2075_length_560_cov_1.158416 560

NODE_2076_length_560_cov_1.158416 560

NODE_2077_length_559_cov_3.271825 559

NODE_2078_length_559_cov_1.875000 559

NODE_2079_length_559_cov_1.785714 559

NODE_2080_length_559_cov_1.470238 559

NODE_2081_length_559_cov_1.339286 559

NODE_2082_length_559_cov_1.212302 559

NODE_2083_length_559_cov_1.182540 559

NODE_2084_length_558_cov_2.236581 558

NODE_2085_length_558_cov_1.610338 558

NODE_2086_length_558_cov_1.163022 558

NODE_2087_length_557_cov_28.631474 557

NODE_2088_length_557_cov_27.647410 557

NODE_2089_length_557_cov_1.701195 557

NODE_2090_length_557_cov_1.523904 557

NODE_2091_length_556_cov_3.091816 556

NODE_2092_length_556_cov_1.479042 556

NODE_2093_length_555_cov_1.440000 555

NODE_2094_length_554_cov_1.533066 554

NODE_2095_length_554_cov_1.533066 554

NODE_2096_length_554_cov_1.072144 554

NODE_2097_length_554_cov_0.905812 554

NODE_2098_length_553_cov_1.172691 553

NODE_2099_length_552_cov_1.219316 552

NODE_2100_length_551_cov_823.326613 551

NODE_2101_length_551_cov_1.542339 551

NODE_2102_length_551_cov_1.360887 551

NODE_2103_length_551_cov_1.050403 551

NODE_2104_length_550_cov_25.608081 550

NODE_2105_length_550_cov_2.230303 550

NODE_2106_length_550_cov_1.763636 550

NODE_2107_length_550_cov_1.680808 550

NODE_2108_length_550_cov_1.527273 550

NODE_2109_length_550_cov_1.513131 550

NODE_2110_length_550_cov_1.363636 550

NODE_2111_length_550_cov_1.175758 550

NODE_2112_length_550_cov_1.159596 550

NODE_2113_length_549_cov_21.111336 549

NODE_2114_length_549_cov_1.236842 549

NODE_2115_length_548_cov_21.310345 548

NODE_2116_length_548_cov_2.190669 548

NODE_2117_length_548_cov_1.734280 548

NODE_2118_length_548_cov_1.545639 548

NODE_2119_length_547_cov_30.577236 547

NODE_2120_length_547_cov_1.646341 547

NODE_2121_length_547_cov_1.599593 547

NODE_2122_length_547_cov_1.554878 547

NODE_2123_length_547_cov_1.463415 547

NODE_2124_length_547_cov_1.459350 547

NODE_2125_length_546_cov_25.213849 546

NODE_2126_length_546_cov_24.162933 546

NODE_2127_length_546_cov_5.676171 546

NODE_2128_length_546_cov_1.283096 546

NODE_2129_length_546_cov_1.006110 546

NODE_2130_length_545_cov_3.122449 545

NODE_2131_length_545_cov_1.453061 545

NODE_2132_length_545_cov_1.285714 545

NODE_2133_length_545_cov_1.157143 545

NODE_2134_length_544_cov_1.656442 544

NODE_2135_length_544_cov_1.398773 544

NODE_2136_length_544_cov_1.192229 544

NODE_2137_length_544_cov_1.012270 544

NODE_2138_length_543_cov_1.932377 543

NODE_2139_length_543_cov_1.661885 543

NODE_2140_length_543_cov_1.290984 543

NODE_2141_length_543_cov_1.290984 543

NODE_2142_length_542_cov_207.188912 542

NODE_2143_length_542_cov_1.328542 542

NODE_2144_length_542_cov_1.016427 542

NODE_2145_length_542_cov_0.924025 542

NODE_2146_length_541_cov_1.691358 541

NODE_2147_length_541_cov_1.666667 541

NODE_2148_length_540_cov_25.861856 540

NODE_2149_length_540_cov_1.736082 540

NODE_2150_length_540_cov_1.670103 540

NODE_2151_length_540_cov_1.014433 540

NODE_2152_length_539_cov_1.580579 539

NODE_2153_length_539_cov_1.394628 539

NODE_2154_length_539_cov_1.394628 539

NODE_2155_length_538_cov_2.047619 538

NODE_2156_length_538_cov_1.956522 538

NODE_2157_length_538_cov_1.855072 538

NODE_2158_length_538_cov_1.490683 538

NODE_2159_length_538_cov_1.490683 538

NODE_2160_length_538_cov_1.397516 538

NODE_2161_length_538_cov_1.118012 538

NODE_2162_length_537_cov_2.960581 537

NODE_2163_length_537_cov_1.558091 537

NODE_2164_length_537_cov_1.340249 537

NODE_2165_length_536_cov_1.683992 536

NODE_2166_length_536_cov_1.122661 536

NODE_2167_length_536_cov_1.054054 536

NODE_2168_length_535_cov_281.979167 535

NODE_2169_length_535_cov_23.950000 535

NODE_2170_length_535_cov_1.781250 535

NODE_2171_length_535_cov_1.500000 535

NODE_2172_length_534_cov_4.288100 534

NODE_2173_length_534_cov_0.929019 534

NODE_2174_length_534_cov_0.845511 534

NODE_2175_length_533_cov_1.830544 533

NODE_2176_length_533_cov_1.788703 533

NODE_2177_length_533_cov_1.788703 533

NODE_2178_length_533_cov_1.784519 533

NODE_2179_length_533_cov_1.658996 533

NODE_2180_length_533_cov_1.489540 533

NODE_2181_length_533_cov_1.378661 533

NODE_2182_length_533_cov_1.278243 533

NODE_2183_length_533_cov_1.169456 533

NODE_2184_length_533_cov_0.941423 533

NODE_2185_length_532_cov_2.169811 532

NODE_2186_length_532_cov_1.549266 532

NODE_2187_length_532_cov_1.320755 532

NODE_2188_length_532_cov_1.289308 532

NODE_2189_length_532_cov_1.226415 532

NODE_2190_length_532_cov_1.150943 532

NODE_2191_length_531_cov_1.493697 531

NODE_2192_length_531_cov_1.228992 531

NODE_2193_length_530_cov_1.326316 530

NODE_2194_length_530_cov_1.136842 530

NODE_2195_length_529_cov_23.208861 529

NODE_2196_length_529_cov_1.613924 529

NODE_2197_length_529_cov_1.329114 529

NODE_2198_length_529_cov_1.033755 529

NODE_2199_length_529_cov_0.947257 529

NODE_2200_length_528_cov_1931.771670 528

NODE_2201_length_528_cov_1.331924 528

NODE_2202_length_528_cov_1.281184 528

NODE_2203_length_528_cov_1.114165 528

NODE_2204_length_528_cov_0.951374 528

NODE_2205_length_527_cov_8.404661 527

NODE_2206_length_527_cov_1.881356 527

NODE_2207_length_527_cov_1.716102 527

NODE_2208_length_526_cov_377.670913 526

NODE_2209_length_526_cov_2.269639 526

NODE_2210_length_526_cov_1.970276 526

NODE_2211_length_526_cov_1.910828 526

NODE_2212_length_526_cov_1.666667 526

NODE_2213_length_526_cov_1.624204 526

NODE_2214_length_525_cov_183.465957 525

NODE_2215_length_525_cov_2.489362 525

NODE_2216_length_525_cov_1.723404 525

NODE_2217_length_525_cov_1.531915 525

NODE_2218_length_525_cov_1.340426 525

NODE_2219_length_525_cov_1.340426 525

NODE_2220_length_525_cov_1.148936 525

NODE_2221_length_525_cov_1.053191 525

NODE_2222_length_524_cov_2.302772 524

NODE_2223_length_524_cov_2.010661 524

NODE_2224_length_524_cov_1.786780 524

NODE_2225_length_524_cov_1.507463 524

NODE_2226_length_524_cov_1.247335 524

NODE_2227_length_523_cov_2.141026 523

NODE_2228_length_523_cov_1.594017 523

NODE_2229_length_523_cov_1.346154 523

NODE_2230_length_523_cov_1.153846 523

NODE_2231_length_522_cov_724.832976 522

NODE_2232_length_522_cov_144.226981 522

NODE_2233_length_522_cov_4.571734 522

NODE_2234_length_522_cov_2.216274 522

NODE_2235_length_522_cov_2.169165 522

NODE_2236_length_522_cov_1.685225 522

NODE_2237_length_522_cov_1.349036 522

NODE_2238_length_521_cov_1.834764 521

NODE_2239_length_521_cov_1.545064 521

NODE_2240_length_521_cov_1.467811 521

NODE_2241_length_521_cov_1.002146 521

NODE_2242_length_521_cov_0.869099 521

NODE_2243_length_520_cov_2.709677 520

NODE_2244_length_520_cov_2.154839 520

NODE_2245_length_520_cov_1.451613 520

NODE_2246_length_520_cov_1.432258 520

NODE_2247_length_520_cov_1.129032 520

NODE_2248_length_520_cov_0.967742 520

NODE_2249_length_519_cov_1.984914 519

NODE_2250_length_519_cov_1.741379 519

NODE_2251_length_519_cov_1.741379 519

NODE_2252_length_519_cov_1.711207 519

NODE_2253_length_519_cov_1.454741 519

NODE_2254_length_519_cov_1.260776 519

NODE_2255_length_519_cov_0.913793 519

NODE_2256_length_518_cov_2.138229 518

NODE_2257_length_517_cov_2.196970 517

NODE_2258_length_517_cov_1.971861 517

NODE_2259_length_517_cov_1.461039 517

NODE_2260_length_516_cov_2.147505 516

NODE_2261_length_516_cov_1.854664 516

NODE_2262_length_516_cov_1.752711 516

NODE_2263_length_516_cov_1.268980 516

NODE_2264_length_516_cov_1.171367 516

NODE_2265_length_515_cov_100.752174 515

NODE_2266_length_515_cov_1.760870 515

NODE_2267_length_514_cov_2.450980 514

NODE_2268_length_514_cov_1.825708 514

NODE_2269_length_514_cov_1.274510 514

NODE_2270_length_513_cov_1.572052 513

NODE_2271_length_513_cov_1.358079 513

NODE_2272_length_513_cov_1.213974 513

NODE_2273_length_513_cov_0.873362 513

NODE_2274_length_512_cov_1.842451 512

NODE_2275_length_512_cov_1.772429 512

NODE_2276_length_512_cov_1.673961 512

NODE_2277_length_512_cov_0.984683 512

NODE_2278_length_511_cov_1.633772 511

NODE_2279_length_511_cov_1.381579 511

NODE_2280_length_511_cov_1.359649 511

NODE_2281_length_510_cov_1.384615 510

NODE_2282_length_510_cov_1.145055 510

NODE_2283_length_509_cov_11.224670 509

NODE_2284_length_509_cov_1.585903 509

NODE_2285_length_509_cov_1.440529 509

NODE_2286_length_509_cov_1.189427 509

NODE_2287_length_508_cov_25.587196 508

NODE_2288_length_508_cov_2.119205 508

NODE_2289_length_508_cov_1.909492 508

NODE_2290_length_508_cov_1.788079 508

NODE_2291_length_508_cov_1.589404 508

NODE_2292_length_508_cov_1.589404 508

NODE_2293_length_507_cov_35.325221 507

NODE_2294_length_507_cov_2.289823 507

NODE_2295_length_506_cov_6015.170732 506

NODE_2296_length_506_cov_1.895787 506

NODE_2297_length_506_cov_1.696231 506

NODE_2298_length_506_cov_1.470067 506

NODE_2299_length_506_cov_1.297118 506

NODE_2300_length_506_cov_1.297118 506

NODE_2301_length_506_cov_1.237251 506

NODE_2302_length_505_cov_1.728889 505

NODE_2303_length_505_cov_1.600000 505

NODE_2304_length_505_cov_1.391111 505

NODE_2305_length_505_cov_1.200000 505

NODE_2306_length_505_cov_1.126667 505

NODE_2307_length_505_cov_1.100000 505

NODE_2308_length_504_cov_252.273942 504

NODE_2309_length_504_cov_2.004454 504

NODE_2310_length_504_cov_1.902004 504

NODE_2311_length_504_cov_1.899777 504

NODE_2312_length_504_cov_1.699332 504

NODE_2313_length_504_cov_1.634744 504

NODE_2314_length_504_cov_1.202673 504

NODE_2315_length_504_cov_1.060134 504

NODE_2316_length_504_cov_0.730512 504

NODE_2317_length_503_cov_2.308036 503

NODE_2318_length_503_cov_1.819196 503

NODE_2319_length_503_cov_1.104911 503

NODE_2320_length_502_cov_23.695749 502

NODE_2321_length_502_cov_2.416107 502

NODE_2322_length_502_cov_1.870246 502

NODE_2323_length_502_cov_1.827740 502

NODE_2324_length_502_cov_1.610738 502

NODE_2325_length_502_cov_1.610738 502

NODE_2326_length_502_cov_1.409396 502

NODE_2327_length_502_cov_1.277405 502

NODE_2328_length_502_cov_1.006711 502

NODE_2329_length_501_cov_1.627803 501

NODE_2330_length_501_cov_1.311659 501

NODE_2331_length_501_cov_1.029148 501

NODE_2332_length_500_cov_1.858427 500

NODE_2333_length_500_cov_1.617978 500

NODE_2334_length_500_cov_1.395506 500

NODE_2335_length_500_cov_1.098876 500

NODE_2336_length_499_cov_98.371622 499

NODE_2337_length_499_cov_2.027027 499

NODE_2338_length_499_cov_1.887387 499

NODE_2339_length_499_cov_1.288288 499

NODE_2340_length_499_cov_1.250000 499

NODE_2341_length_499_cov_1.114865 499

NODE_2342_length_498_cov_4.433409 498

NODE_2343_length_498_cov_2.742664 498

NODE_2344_length_498_cov_1.790068 498

NODE_2345_length_498_cov_1.600451 498

NODE_2346_length_498_cov_1.487585 498

NODE_2347_length_498_cov_1.320542 498

NODE_2348_length_498_cov_1.015801 498

NODE_2349_length_497_cov_1.359729 497

NODE_2350_length_497_cov_1.287330 497

NODE_2351_length_497_cov_1.194570 497

NODE_2352_length_497_cov_1.158371 497

NODE_2353_length_496_cov_1.326531 496

NODE_2354_length_496_cov_1.326531 496

NODE_2355_length_496_cov_0.816327 496

NODE_2356_length_495_cov_1.752273 495

NODE_2357_length_495_cov_1.738636 495

NODE_2358_length_495_cov_1.534091 495

NODE_2359_length_495_cov_1.481818 495

NODE_2360_length_495_cov_1.022727 495

NODE_2361_length_494_cov_1.633257 494

NODE_2362_length_494_cov_1.025057 494

NODE_2363_length_494_cov_0.892938 494

NODE_2364_length_493_cov_2.054795 493

NODE_2365_length_493_cov_1.541096 493

NODE_2366_length_493_cov_1.335616 493

NODE_2367_length_492_cov_1.750572 492

NODE_2368_length_492_cov_1.544622 492

NODE_2369_length_492_cov_1.235698 492

NODE_2370_length_492_cov_1.183066 492

NODE_2371_length_492_cov_0.823799 492

NODE_2372_length_491_cov_46.986239 491

NODE_2373_length_491_cov_39.864679 491

NODE_2374_length_491_cov_1.332569 491

NODE_2375_length_490_cov_1.862069 490

NODE_2376_length_490_cov_1.818391 490

NODE_2377_length_490_cov_1.751724 490

NODE_2378_length_490_cov_1.121839 490

NODE_2379_length_490_cov_1.034483 490

NODE_2380_length_490_cov_1.034483 490

NODE_2381_length_490_cov_0.912644 490

NODE_2382_length_489_cov_2.069124 489

NODE_2383_length_489_cov_1.813364 489

NODE_2384_length_489_cov_1.631336 489

NODE_2385_length_489_cov_1.324885 489

NODE_2386_length_488_cov_2.316397 488

NODE_2387_length_488_cov_1.685912 488

NODE_2388_length_488_cov_1.346420 488

NODE_2389_length_488_cov_0.826790 488

NODE_2390_length_487_cov_14445.143519 487

NODE_2391_length_487_cov_1.631944 487

NODE_2392_length_487_cov_1.562500 487

NODE_2393_length_487_cov_1.412037 487

NODE_2394_length_487_cov_0.935185 487

NODE_2395_length_487_cov_0.868056 487

NODE_2396_length_486_cov_2.190255 486

NODE_2397_length_485_cov_4.958140 485

NODE_2398_length_485_cov_1.246512 485

NODE_2399_length_485_cov_1.151163 485

NODE_2400_length_484_cov_1.568765 484

NODE_2401_length_484_cov_1.200466 484

NODE_2402_length_484_cov_1.149184 484

NODE_2403_length_484_cov_0.662005 484

NODE_2404_length_483_cov_1.682243 483

NODE_2405_length_483_cov_1.366822 483

NODE_2406_length_483_cov_1.366822 483

NODE_2407_length_483_cov_1.247664 483

NODE_2408_length_482_cov_2.107728 482

NODE_2409_length_482_cov_1.791569 482

NODE_2410_length_482_cov_1.683841 482

NODE_2411_length_482_cov_1.580796 482

NODE_2412_length_482_cov_1.503513 482

NODE_2413_length_482_cov_1.475410 482

NODE_2414_length_482_cov_1.344262 482

NODE_2415_length_482_cov_1.053864 482

NODE_2416_length_481_cov_32.410798 481

NODE_2417_length_481_cov_2.251174 481

NODE_2418_length_481_cov_1.373239 481

NODE_2419_length_481_cov_1.302817 481

NODE_2420_length_481_cov_1.157277 481

NODE_2421_length_480_cov_27.745882 480

NODE_2422_length_480_cov_3.176471 480

NODE_2423_length_480_cov_2.096471 480

NODE_2424_length_480_cov_2.054118 480

NODE_2425_length_480_cov_1.800000 480

NODE_2426_length_480_cov_1.482353 480

NODE_2427_length_480_cov_1.447059 480

NODE_2428_length_480_cov_1.240000 480

NODE_2429_length_480_cov_1.164706 480

NODE_2430_length_480_cov_1.152941 480

NODE_2431_length_479_cov_4.129717 479

NODE_2432_length_479_cov_2.311321 479

NODE_2433_length_479_cov_1.698113 479

NODE_2434_length_479_cov_1.363208 479

NODE_2435_length_479_cov_1.273585 479

NODE_2436_length_479_cov_1.167453 479

NODE_2437_length_478_cov_2.127660 478

NODE_2438_length_478_cov_2.021277 478

NODE_2439_length_478_cov_1.276596 478

NODE_2440_length_477_cov_22.272512 477

NODE_2441_length_477_cov_14.355450 477

NODE_2442_length_477_cov_2.026066 477

NODE_2443_length_477_cov_1.706161 477

NODE_2444_length_477_cov_1.578199 477

NODE_2445_length_476_cov_12504.349169 476

NODE_2446_length_476_cov_12.182898 476

NODE_2447_length_476_cov_2.030879 476

NODE_2448_length_476_cov_1.774347 476

NODE_2449_length_476_cov_1.434679 476

NODE_2450_length_475_cov_23.300000 475

NODE_2451_length_475_cov_2.807143 475

NODE_2452_length_475_cov_1.714286 475

NODE_2453_length_475_cov_1.607143 475

NODE_2454_length_475_cov_1.511905 475

NODE_2455_length_475_cov_1.238095 475

NODE_2456_length_475_cov_1.178571 475

NODE_2457_length_475_cov_1.104762 475

NODE_2458_length_475_cov_1.071429 475

NODE_2459_length_474_cov_1.610979 474

NODE_2460_length_474_cov_1.288783 474

NODE_2461_length_474_cov_1.073986 474

NODE_2462_length_474_cov_0.947494 474

NODE_2463_length_473_cov_2.045455 473

NODE_2464_length_473_cov_2.045455 473

NODE_2465_length_473_cov_1.825359 473

NODE_2466_length_473_cov_1.399522 473

NODE_2467_length_472_cov_63.937650 472

NODE_2468_length_472_cov_14.035971 472

NODE_2469_length_472_cov_1.942446 472

NODE_2470_length_472_cov_1.402878 472

NODE_2471_length_472_cov_1.079137 472

NODE_2472_length_471_cov_1.745192 471

NODE_2473_length_471_cov_1.730769 471

NODE_2474_length_471_cov_1.189904 471

NODE_2475_length_470_cov_1.734940 470

NODE_2476_length_470_cov_1.409639 470

NODE_2477_length_470_cov_1.301205 470

NODE_2478_length_470_cov_0.975904 470

NODE_2479_length_469_cov_4.243961 469

NODE_2480_length_469_cov_2.282609 469

NODE_2481_length_469_cov_1.942029 469

NODE_2482_length_469_cov_1.915459 469

NODE_2483_length_469_cov_1.195652 469

NODE_2484_length_469_cov_0.760870 469

NODE_2485_length_468_cov_2.179177 468

NODE_2486_length_468_cov_1.743341 468

NODE_2487_length_468_cov_1.644068 468

NODE_2488_length_468_cov_1.389831 468

NODE_2489_length_468_cov_1.307506 468

NODE_2490_length_467_cov_2.184466 467

NODE_2491_length_467_cov_1.839806 467

NODE_2492_length_467_cov_1.400485 467

NODE_2493_length_467_cov_1.092233 467

NODE_2494_length_466_cov_1.554745 466

NODE_2495_length_466_cov_1.440389 466

NODE_2496_length_466_cov_1.423358 466

NODE_2497_length_466_cov_0.985401 466

NODE_2498_length_465_cov_1.207317 465

NODE_2499_length_465_cov_1.097561 465

NODE_2500_length_465_cov_0.987805 465

NODE_2501_length_464_cov_3685.396088 464

NODE_2502_length_464_cov_2.004890 464

NODE_2503_length_464_cov_1.540342 464

NODE_2504_length_464_cov_1.525672 464

NODE_2505_length_464_cov_1.413203 464

NODE_2506_length_464_cov_1.210269 464

NODE_2507_length_463_cov_1.654412 463

NODE_2508_length_463_cov_1.595588 463

NODE_2509_length_463_cov_1.544118 463

NODE_2510_length_463_cov_1.544118 463

NODE_2511_length_463_cov_1.470588 463

NODE_2512_length_463_cov_1.323529 463

NODE_2513_length_463_cov_1.107843 463

NODE_2514_length_462_cov_61.737101 462

NODE_2515_length_462_cov_10.454545 462

NODE_2516_length_462_cov_2.100737 462

NODE_2517_length_462_cov_1.990172 462

NODE_2518_length_462_cov_1.683047 462

NODE_2519_length_462_cov_1.633907 462

NODE_2520_length_462_cov_1.631450 462

NODE_2521_length_462_cov_1.547912 462

NODE_2522_length_462_cov_1.538084 462

NODE_2523_length_462_cov_1.533170 462

NODE_2524_length_462_cov_1.533170 462

NODE_2525_length_462_cov_1.321867 462

NODE_2526_length_462_cov_0.970516 462

NODE_2527_length_462_cov_0.742015 462

NODE_2528_length_461_cov_1045.278325 461

NODE_2529_length_461_cov_1.741379 461

NODE_2530_length_461_cov_1.330049 461

NODE_2531_length_461_cov_1.108374 461

NODE_2532_length_461_cov_0.635468 461

NODE_2533_length_460_cov_2.402469 460

NODE_2534_length_460_cov_1.753086 460

NODE_2535_length_460_cov_1.666667 460

NODE_2536_length_460_cov_1.666667 460

NODE_2537_length_460_cov_1.555556 460

NODE_2538_length_460_cov_1.222222 460

NODE_2539_length_460_cov_1.222222 460

NODE_2540_length_460_cov_0.918519 460

NODE_2541_length_459_cov_1.670792 459

NODE_2542_length_459_cov_1.440594 459

NODE_2543_length_459_cov_1.336634 459

NODE_2544_length_459_cov_1.336634 459

NODE_2545_length_459_cov_1.113861 459

NODE_2546_length_458_cov_1.451613 458

NODE_2547_length_458_cov_1.451613 458

NODE_2548_length_458_cov_1.339950 458

NODE_2549_length_458_cov_1.062035 458

NODE_2550_length_458_cov_1.027295 458

NODE_2551_length_457_cov_2.393035 457

NODE_2552_length_457_cov_1.902985 457

NODE_2553_length_457_cov_1.679104 457

NODE_2554_length_457_cov_1.325871 457

NODE_2555_length_457_cov_1.119403 457

NODE_2556_length_457_cov_0.890547 457

NODE_2557_length_456_cov_7439.750623 456

NODE_2558_length_456_cov_2.356608 456

NODE_2559_length_456_cov_2.132170 456

NODE_2560_length_456_cov_2.019950 456

NODE_2561_length_456_cov_1.703242 456

NODE_2562_length_456_cov_1.473815 456

NODE_2563_length_456_cov_1.346633 456

NODE_2564_length_456_cov_1.324190 456

NODE_2565_length_456_cov_0.962594 456

NODE_2566_length_455_cov_78.317500 455

NODE_2567_length_455_cov_1.460000 455

NODE_2568_length_455_cov_1.410000 455

NODE_2569_length_455_cov_1.237500 455

NODE_2570_length_455_cov_1.237500 455

NODE_2571_length_455_cov_1.237500 455

NODE_2572_length_455_cov_1.237500 455

NODE_2573_length_455_cov_1.125000 455

NODE_2574_length_454_cov_29.521303 454

NODE_2575_length_454_cov_1.476190 454

NODE_2576_length_453_cov_2.374372 453

NODE_2577_length_453_cov_2.027638 453

NODE_2578_length_453_cov_1.731156 453

NODE_2579_length_453_cov_1.695980 453

NODE_2580_length_453_cov_1.562814 453

NODE_2581_length_453_cov_1.452261 453

NODE_2582_length_453_cov_1.017588 453

NODE_2583_length_453_cov_0.854271 453

NODE_2584_length_453_cov_0.854271 453

NODE_2585_length_452_cov_1077.015113 452

NODE_2586_length_452_cov_1.813602 452

NODE_2587_length_452_cov_1.813602 452

NODE_2588_length_452_cov_1.664987 452

NODE_2589_length_452_cov_1.501259 452

NODE_2590_length_452_cov_1.246851 452

NODE_2591_length_452_cov_1.020151 452

NODE_2592_length_451_cov_2.439394 451

NODE_2593_length_451_cov_1.818182 451

NODE_2594_length_451_cov_1.818182 451

NODE_2595_length_451_cov_1.704545 451

NODE_2596_length_451_cov_1.704545 451

NODE_2597_length_451_cov_1.676768 451

NODE_2598_length_451_cov_1.618687 451

NODE_2599_length_451_cov_1.590909 451

NODE_2600_length_451_cov_1.588384 451

NODE_2601_length_451_cov_1.477273 451

NODE_2602_length_451_cov_1.250000 451

NODE_2603_length_451_cov_1.154040 451

NODE_2604_length_451_cov_0.969697 451

NODE_2605_length_451_cov_0.795455 451

NODE_2606_length_450_cov_66.830380 450

NODE_2607_length_450_cov_34.194937 450

NODE_2608_length_450_cov_3.815190 450

NODE_2609_length_450_cov_1.253165 450

NODE_2610_length_450_cov_1.245570 450

NODE_2611_length_450_cov_1.070886 450

NODE_2612_length_449_cov_9.794416 449

NODE_2613_length_449_cov_9.225888 449

NODE_2614_length_449_cov_5.385787 449

NODE_2615_length_449_cov_1.908629 449

NODE_2616_length_449_cov_1.827411 449

NODE_2617_length_449_cov_1.654822 449

NODE_2618_length_449_cov_1.197970 449

NODE_2619_length_449_cov_1.010152 449

NODE_2620_length_448_cov_4.368957 448

NODE_2621_length_448_cov_1.847328 448

NODE_2622_length_448_cov_1.603053 448

NODE_2623_length_448_cov_1.603053 448

NODE_2624_length_448_cov_1.374046 448

NODE_2625_length_448_cov_1.259542 448

NODE_2626_length_448_cov_1.094148 448

NODE_2627_length_447_cov_4.500000 447

NODE_2628_length_446_cov_1.726343 446

NODE_2629_length_446_cov_1.381074 446

NODE_2630_length_446_cov_1.265985 446

NODE_2631_length_446_cov_1.217391 446

NODE_2632_length_446_cov_1.150895 446

NODE_2633_length_446_cov_1.094629 446

NODE_2634_length_445_cov_50.305128 445

NODE_2635_length_445_cov_4.705128 445

NODE_2636_length_445_cov_2.076923 445

NODE_2637_length_445_cov_1.269231 445

NODE_2638_length_445_cov_1.266667 445

NODE_2639_length_445_cov_1.153846 445

NODE_2640_length_445_cov_1.143590 445

NODE_2641_length_445_cov_1.038462 445

NODE_2642_length_445_cov_0.923077 445

NODE_2643_length_444_cov_2.197943 444

NODE_2644_length_444_cov_2.082262 444

NODE_2645_length_444_cov_1.619537 444

NODE_2646_length_444_cov_1.041131 444

NODE_2647_length_444_cov_1.020566 444

NODE_2648_length_443_cov_2.203608 443

NODE_2649_length_443_cov_0.927835 443

NODE_2650_length_443_cov_0.719072 443

NODE_2651_length_442_cov_39.542636 442

NODE_2652_length_442_cov_2.111111 442

NODE_2653_length_442_cov_1.912145 442

NODE_2654_length_442_cov_1.279070 442

NODE_2655_length_442_cov_1.142119 442

NODE_2656_length_442_cov_1.095607 442

NODE_2657_length_441_cov_1.961140 441

NODE_2658_length_441_cov_1.220207 441

NODE_2659_length_441_cov_1.165803 441

NODE_2660_length_441_cov_1.103627 441

NODE_2661_length_441_cov_0.932642 441

NODE_2662_length_440_cov_1872.387013 440

NODE_2663_length_440_cov_1.636364 440

NODE_2664_length_440_cov_1.618182 440

NODE_2665_length_440_cov_1.485714 440

NODE_2666_length_440_cov_1.394805 440

NODE_2667_length_440_cov_1.285714 440

NODE_2668_length_440_cov_1.168831 440

NODE_2669_length_440_cov_0.732468 440

NODE_2670_length_439_cov_1.994792 439

NODE_2671_length_439_cov_1.757812 439

NODE_2672_length_439_cov_1.406250 439

NODE_2673_length_439_cov_1.171875 439

NODE_2674_length_439_cov_1.054688 439

NODE_2675_length_438_cov_11.613577 438

NODE_2676_length_438_cov_2.650131 438

NODE_2677_length_438_cov_1.686684 438

NODE_2678_length_438_cov_1.496084 438

NODE_2679_length_438_cov_1.456919 438

NODE_2680_length_438_cov_1.323760 438

NODE_2681_length_438_cov_1.174935 438

NODE_2682_length_437_cov_2.295812 437

NODE_2683_length_437_cov_1.455497 437

NODE_2684_length_437_cov_1.295812 437

NODE_2685_length_437_cov_1.178010 437

NODE_2686_length_437_cov_0.973822 437

NODE_2687_length_437_cov_0.942408 437

NODE_2688_length_437_cov_0.866492 437

NODE_2689_length_437_cov_0.824607 437

NODE_2690_length_436_cov_220.443570 436

NODE_2691_length_436_cov_11.304462 436

NODE_2692_length_436_cov_2.007874 436

NODE_2693_length_436_cov_1.889764 436

NODE_2694_length_436_cov_1.299213 436

NODE_2695_length_436_cov_1.299213 436

NODE_2696_length_436_cov_1.259843 436

NODE_2697_length_436_cov_0.881890 436

NODE_2698_length_435_cov_2.034211 435

NODE_2699_length_435_cov_2.013158 435

NODE_2700_length_435_cov_1.184211 435

NODE_2701_length_435_cov_0.926316 435

NODE_2702_length_434_cov_51.701847 434

NODE_2703_length_434_cov_1.936675 434

NODE_2704_length_434_cov_1.284960 434

NODE_2705_length_434_cov_1.150396 434

NODE_2706_length_433_cov_1.412698 433

NODE_2707_length_433_cov_1.309524 433

NODE_2708_length_433_cov_0.833333 433

NODE_2709_length_432_cov_2.212202 432

NODE_2710_length_432_cov_2.029178 432

NODE_2711_length_432_cov_1.432361 432

NODE_2712_length_432_cov_1.432361 432

NODE_2713_length_431_cov_1.914894 431

NODE_2714_length_431_cov_1.914894 431

NODE_2715_length_431_cov_1.800532 431

NODE_2716_length_431_cov_1.792553 431

NODE_2717_length_431_cov_1.675532 431

NODE_2718_length_431_cov_1.436170 431

NODE_2719_length_431_cov_1.436170 431

NODE_2720_length_431_cov_1.015957 431

NODE_2721_length_430_cov_1.800000 430

NODE_2722_length_430_cov_1.680000 430

NODE_2723_length_429_cov_1.925134 429

NODE_2724_length_429_cov_1.561497 429

NODE_2725_length_429_cov_1.441176 429

NODE_2726_length_429_cov_1.382353 429

NODE_2727_length_428_cov_147.292225 428

NODE_2728_length_428_cov_1.632708 428

NODE_2729_length_428_cov_1.206434 428

NODE_2730_length_428_cov_1.203753 428

NODE_2731_length_427_cov_31.295699 427

NODE_2732_length_427_cov_26.470430 427

NODE_2733_length_427_cov_1.986559 427

NODE_2734_length_427_cov_1.693548 427

NODE_2735_length_427_cov_1.572581 427

NODE_2736_length_427_cov_1.322581 427

NODE_2737_length_427_cov_1.088710 427

NODE_2738_length_426_cov_2.061995 426

NODE_2739_length_426_cov_1.787062 426

NODE_2740_length_426_cov_1.727763 426

NODE_2741_length_426_cov_1.698113 426

NODE_2742_length_426_cov_1.614555 426

NODE_2743_length_426_cov_1.522911 426

NODE_2744_length_426_cov_1.091644 426

NODE_2745_length_425_cov_8.437838 425

NODE_2746_length_425_cov_1.702703 425

NODE_2747_length_425_cov_1.459459 425

NODE_2748_length_425_cov_1.316216 425

NODE_2749_length_425_cov_1.216216 425

NODE_2750_length_425_cov_1.194595 425

NODE_2751_length_425_cov_1.135135 425

NODE_2752_length_425_cov_0.972973 425

NODE_2753_length_425_cov_0.918919 425

NODE_2754_length_424_cov_24.680217 424

NODE_2755_length_424_cov_1.623306 424

NODE_2756_length_424_cov_1.563686 424

NODE_2757_length_424_cov_1.463415 424

NODE_2758_length_424_cov_1.463415 424

NODE_2759_length_424_cov_1.336043 424

NODE_2760_length_424_cov_1.219512 424

NODE_2761_length_424_cov_1.149051 424

NODE_2762_length_423_cov_2.323370 423

NODE_2763_length_423_cov_1.834239 423

NODE_2764_length_423_cov_1.711957 423

NODE_2765_length_423_cov_1.597826 423

NODE_2766_length_423_cov_1.543478 423

NODE_2767_length_423_cov_1.345109 423

NODE_2768_length_423_cov_1.138587 423

NODE_2769_length_423_cov_1.100543 423

NODE_2770_length_423_cov_1.097826 423

NODE_2771_length_423_cov_1.054348 423

NODE_2772_length_422_cov_1.852861 422

NODE_2773_length_422_cov_1.479564 422

NODE_2774_length_422_cov_1.471390 422

NODE_2775_length_422_cov_1.348774 422

NODE_2776_length_422_cov_1.348774 422

NODE_2777_length_422_cov_1.103542 422

NODE_2778_length_421_cov_61.032787 421

NODE_2779_length_421_cov_14.562842 421

NODE_2780_length_421_cov_1.598361 421

NODE_2781_length_421_cov_1.560109 421

NODE_2782_length_420_cov_26.684932 420

NODE_2783_length_420_cov_2.219178 420

NODE_2784_length_420_cov_1.726027 420

NODE_2785_length_420_cov_1.657534 420

NODE_2786_length_420_cov_1.602740 420

NODE_2787_length_420_cov_1.479452 420

NODE_2788_length_419_cov_3.552198 419

NODE_2789_length_419_cov_2.348901 419

NODE_2790_length_419_cov_1.730769 419

NODE_2791_length_419_cov_1.307692 419

NODE_2792_length_419_cov_1.236264 419

NODE_2793_length_419_cov_1.236264 419

NODE_2794_length_419_cov_1.112637 419

NODE_2795_length_419_cov_0.978022 419

NODE_2796_length_419_cov_0.865385 419

NODE_2797_length_418_cov_1.517906 418

NODE_2798_length_418_cov_1.487603 418

NODE_2799_length_418_cov_1.239669 418

NODE_2800_length_417_cov_1.740331 417

NODE_2801_length_417_cov_1.337017 417

NODE_2802_length_416_cov_1.994460 416

NODE_2803_length_416_cov_1.745152 416

NODE_2804_length_416_cov_1.592798 416

NODE_2805_length_415_cov_1.750000 415

NODE_2806_length_415_cov_1.747222 415

NODE_2807_length_415_cov_1.697222 415

NODE_2808_length_415_cov_1.572222 415

NODE_2809_length_415_cov_1.280556 415

NODE_2810_length_415_cov_0.961111 415

NODE_2811_length_415_cov_0.827778 415

NODE_2812_length_414_cov_98.821727 414

NODE_2813_length_414_cov_1.662953 414

NODE_2814_length_413_cov_3470.175978 413

NODE_2815_length_413_cov_15.192737 413

NODE_2816_length_413_cov_7.393855 413

NODE_2817_length_413_cov_2.120112 413

NODE_2818_length_413_cov_2.011173 413

NODE_2819_length_413_cov_1.905028 413

NODE_2820_length_413_cov_1.508380 413

NODE_2821_length_413_cov_1.508380 413

NODE_2822_length_413_cov_1.505587 413

NODE_2823_length_413_cov_1.256983 413

NODE_2824_length_413_cov_0.754190 413

NODE_2825_length_412_cov_1.512605 412

NODE_2826_length_412_cov_1.512605 412

NODE_2827_length_412_cov_1.386555 412

NODE_2828_length_412_cov_1.386555 412

NODE_2829_length_412_cov_1.386555 412

NODE_2830_length_412_cov_1.260504 412

NODE_2831_length_412_cov_1.260504 412

NODE_2832_length_412_cov_1.260504 412

NODE_2833_length_412_cov_1.257703 412

NODE_2834_length_412_cov_1.008403 412

NODE_2835_length_412_cov_0.969188 412

NODE_2836_length_412_cov_0.756303 412

NODE_2837_length_411_cov_231.938202 411

NODE_2838_length_411_cov_1.769663 411

NODE_2839_length_411_cov_1.390449 411

NODE_2840_length_411_cov_1.115169 411

NODE_2841_length_410_cov_18.895775 410

NODE_2842_length_410_cov_1.647887 410

NODE_2843_length_410_cov_1.633803 410

NODE_2844_length_410_cov_1.521127 410

NODE_2845_length_410_cov_1.507042 410

NODE_2846_length_410_cov_1.481690 410

NODE_2847_length_410_cov_1.371831 410

NODE_2848_length_410_cov_1.261972 410

NODE_2849_length_410_cov_0.887324 410

NODE_2850_length_410_cov_0.760563 410

NODE_2851_length_409_cov_1.271186 409

NODE_2852_length_409_cov_1.144068 409

NODE_2853_length_409_cov_1.016949 409

NODE_2854_length_409_cov_0.779661 409

NODE_2855_length_408_cov_2.297450 408

NODE_2856_length_408_cov_1.305949 408

NODE_2857_length_408_cov_1.028329 408

NODE_2858_length_408_cov_0.971671 408

NODE_2859_length_408_cov_0.892351 408

NODE_2860_length_408_cov_0.892351 408

NODE_2861_length_407_cov_2.156250 407

NODE_2862_length_407_cov_1.769886 407

NODE_2863_length_407_cov_1.454545 407

NODE_2864_length_407_cov_1.014205 407

NODE_2865_length_407_cov_0.866477 407

NODE_2866_length_407_cov_0.821023 407

NODE_2867_length_407_cov_0.767045 407

NODE_2868_length_406_cov_1556.532764 406

NODE_2869_length_406_cov_1.410256 406

NODE_2870_length_405_cov_105.668571 405

NODE_2871_length_405_cov_1.800000 405

NODE_2872_length_405_cov_0.774286 405

NODE_2873_length_404_cov_1.934097 404

NODE_2874_length_404_cov_1.676218 404

NODE_2875_length_404_cov_1.590258 404

NODE_2876_length_404_cov_1.289398 404

NODE_2877_length_404_cov_1.289398 404

NODE_2878_length_403_cov_1135.405172 403

NODE_2879_length_403_cov_2.522989 403

NODE_2880_length_403_cov_1.939655 403

NODE_2881_length_403_cov_1.525862 403

NODE_2882_length_403_cov_1.422414 403

NODE_2883_length_403_cov_1.278736 403

NODE_2884_length_403_cov_1.163793 403

NODE_2885_length_403_cov_1.163793 403

NODE_2886_length_403_cov_1.034483 403

NODE_2887_length_403_cov_0.905172 403

NODE_2888_length_402_cov_1.861671 402

NODE_2889_length_402_cov_1.685879 402

NODE_2890_length_402_cov_1.680115 402

NODE_2891_length_402_cov_1.556196 402

NODE_2892_length_402_cov_1.426513 402

NODE_2893_length_402_cov_1.426513 402

NODE_2894_length_402_cov_1.167147 402

NODE_2895_length_402_cov_1.054755 402

NODE_2896_length_402_cov_0.907781 402

NODE_2897_length_401_cov_4.604046 401

NODE_2898_length_401_cov_1.820809 401

NODE_2899_length_401_cov_1.560694 401

NODE_2900_length_401_cov_1.430636 401

NODE_2901_length_401_cov_1.352601 401

NODE_2902_length_401_cov_1.225434 401

NODE_2903_length_401_cov_1.170520 401

NODE_2904_length_401_cov_1.170520 401

NODE_2905_length_401_cov_1.040462 401

NODE_2906_length_401_cov_0.780347 401

NODE_2907_length_400_cov_2.086957 400

NODE_2908_length_400_cov_1.565217 400

NODE_2909_length_400_cov_1.457971 400

NODE_2910_length_400_cov_1.397101 400

NODE_2911_length_399_cov_1099.014535 399

NODE_2912_length_399_cov_113.220930 399

NODE_2913_length_399_cov_1.915698 399

NODE_2914_length_399_cov_1.671512 399

NODE_2915_length_399_cov_1.438953 399

NODE_2916_length_399_cov_1.308140 399

NODE_2917_length_399_cov_1.220930 399

NODE_2918_length_399_cov_1.177326 399

NODE_2919_length_399_cov_1.046512 399

NODE_2920_length_398_cov_80.900875 398

NODE_2921_length_398_cov_2.679300 398

NODE_2922_length_398_cov_1.443149 398

NODE_2923_length_398_cov_1.443149 398

NODE_2924_length_398_cov_1.180758 398

NODE_2925_length_398_cov_0.918367 398

NODE_2926_length_397_cov_79.546784 397

NODE_2927_length_397_cov_2.973684 397

NODE_2928_length_397_cov_1.842105 397

NODE_2929_length_397_cov_1.678363 397

NODE_2930_length_397_cov_1.578947 397

NODE_2931_length_397_cov_1.330409 397

NODE_2932_length_397_cov_1.184211 397

NODE_2933_length_397_cov_0.789474 397

NODE_2934_length_396_cov_2.111437 396

NODE_2935_length_396_cov_1.958944 396

NODE_2936_length_396_cov_1.847507 396

NODE_2937_length_396_cov_1.768328 396

NODE_2938_length_396_cov_1.583578 396

NODE_2939_length_396_cov_1.583578 396

NODE_2940_length_396_cov_1.093842 396

NODE_2941_length_395_cov_2.514706 395

NODE_2942_length_395_cov_1.455882 395

NODE_2943_length_395_cov_1.323529 395

NODE_2944_length_394_cov_1.858407 394

NODE_2945_length_394_cov_1.725664 394

NODE_2946_length_394_cov_1.589971 394

NODE_2947_length_394_cov_1.460177 394

NODE_2948_length_394_cov_1.404130 394

NODE_2949_length_394_cov_1.327434 394

NODE_2950_length_394_cov_1.327434 394

NODE_2951_length_394_cov_1.324484 394

NODE_2952_length_393_cov_1.198225 393

NODE_2953_length_393_cov_1.065089 393

NODE_2954_length_393_cov_0.798817 393

NODE_2955_length_392_cov_1.735905 392

NODE_2956_length_392_cov_1.629080 392

NODE_2957_length_392_cov_1.068249 392

NODE_2958_length_391_cov_42.428571 391

NODE_2959_length_391_cov_1.607143 391

NODE_2960_length_391_cov_1.339286 391

NODE_2961_length_391_cov_1.172619 391

NODE_2962_length_391_cov_1.035714 391

NODE_2963_length_391_cov_0.937500 391

NODE_2964_length_390_cov_1.880597 390

NODE_2965_length_390_cov_1.477612 390

NODE_2966_length_390_cov_1.477612 390

NODE_2967_length_390_cov_1.343284 390

NODE_2968_length_390_cov_1.205970 390

NODE_2969_length_390_cov_1.173134 390

NODE_2970_length_390_cov_1.074627 390

NODE_2971_length_390_cov_0.937313 390

NODE_2972_length_389_cov_2.173653 389

NODE_2973_length_389_cov_2.020958 389

NODE_2974_length_389_cov_1.365269 389

NODE_2975_length_389_cov_1.077844 389

NODE_2976_length_389_cov_1.068862 389

NODE_2977_length_389_cov_0.931138 389

NODE_2978_length_388_cov_1.756757 388

NODE_2979_length_388_cov_1.612613 388

NODE_2980_length_388_cov_1.486486 388

NODE_2981_length_388_cov_1.351351 388

NODE_2982_length_388_cov_1.264264 388

NODE_2983_length_387_cov_1.626506 387

NODE_2984_length_387_cov_1.325301 387

NODE_2985_length_387_cov_1.250000 387

NODE_2986_length_387_cov_1.099398 387

NODE_2987_length_387_cov_0.948795 387

NODE_2988_length_387_cov_0.894578 387

NODE_2989_length_386_cov_43.839879 386

NODE_2990_length_386_cov_30.833837 386

NODE_2991_length_386_cov_3.435045 386

NODE_2992_length_386_cov_1.978852 386

NODE_2993_length_386_cov_1.631420 386

NODE_2994_length_386_cov_1.631420 386

NODE_2995_length_386_cov_1.359517 386

NODE_2996_length_386_cov_1.320242 386

NODE_2997_length_386_cov_1.223565 386

NODE_2998_length_386_cov_0.812689 386

NODE_2999_length_385_cov_30.878788 385

NODE_3000_length_385_cov_1.721212 385

NODE_3001_length_385_cov_1.636364 385

NODE_3002_length_385_cov_1.363636 385

NODE_3003_length_385_cov_1.363636 385

NODE_3004_length_385_cov_1.090909 385

NODE_3005_length_385_cov_0.742424 385

NODE_3006_length_384_cov_2.462006 384

NODE_3007_length_384_cov_2.313070 384

NODE_3008_length_384_cov_1.884498 384

NODE_3009_length_384_cov_1.483283 384

NODE_3010_length_384_cov_1.452888 384

NODE_3011_length_384_cov_1.231003 384

NODE_3012_length_384_cov_1.231003 384

NODE_3013_length_384_cov_1.173252 384

NODE_3014_length_384_cov_1.094225 384

NODE_3015_length_384_cov_1.094225 384

NODE_3016_length_384_cov_1.051672 384

NODE_3017_length_384_cov_0.820669 384

NODE_3018_length_383_cov_24.689024 383

NODE_3019_length_383_cov_1.783537 383

NODE_3020_length_383_cov_1.753049 383

NODE_3021_length_383_cov_1.503049 383

NODE_3022_length_383_cov_1.429878 383

NODE_3023_length_383_cov_0.926829 383

NODE_3024_length_383_cov_0.713415 383

NODE_3025_length_382_cov_4.840979 382

NODE_3026_length_382_cov_1.944954 382

NODE_3027_length_382_cov_1.651376 382

NODE_3028_length_382_cov_1.636086 382

NODE_3029_length_382_cov_1.376147 382

NODE_3030_length_382_cov_1.238532 382

NODE_3031_length_382_cov_1.100917 382

NODE_3032_length_381_cov_2.208589 381

NODE_3033_length_381_cov_1.628834 381

NODE_3034_length_381_cov_1.613497 381

NODE_3035_length_381_cov_1.380368 381

NODE_3036_length_381_cov_1.380368 381

NODE_3037_length_381_cov_1.242331 381

NODE_3038_length_381_cov_1.088957 381

NODE_3039_length_381_cov_0.966258 381

NODE_3040_length_380_cov_1.384615 380

NODE_3041_length_380_cov_1.384615 380

NODE_3042_length_380_cov_1.295385 380

NODE_3043_length_380_cov_1.107692 380

NODE_3044_length_379_cov_2.083333 379

NODE_3045_length_379_cov_1.388889 379

NODE_3046_length_379_cov_1.385802 379

NODE_3047_length_379_cov_0.972222 379

NODE_3048_length_379_cov_0.972222 379

NODE_3049_length_378_cov_1.950464 378

NODE_3050_length_378_cov_1.647059 378

NODE_3051_length_378_cov_1.532508 378

NODE_3052_length_378_cov_1.362229 378

NODE_3053_length_377_cov_30.130435 377

NODE_3054_length_377_cov_1.537267 377

NODE_3055_length_377_cov_1.537267 377

NODE_3056_length_377_cov_1.537267 377

NODE_3057_length_377_cov_1.397516 377

NODE_3058_length_377_cov_1.118012 377

NODE_3059_length_377_cov_0.978261 377

NODE_3060_length_376_cov_34.601246 376

NODE_3061_length_376_cov_2.242991 376

NODE_3062_length_376_cov_2.074766 376

NODE_3063_length_376_cov_1.682243 376

NODE_3064_length_376_cov_0.981308 376

NODE_3065_length_376_cov_0.841121 376

NODE_3066_length_375_cov_1.850000 375

NODE_3067_length_375_cov_1.828125 375

NODE_3068_length_375_cov_1.546875 375

NODE_3069_length_375_cov_1.346875 375

NODE_3070_length_375_cov_1.265625 375

NODE_3071_length_375_cov_1.262500 375

NODE_3072_length_375_cov_1.125000 375

NODE_3073_length_375_cov_1.125000 375

NODE_3074_length_375_cov_1.118750 375

NODE_3075_length_375_cov_0.984375 375

NODE_3076_length_375_cov_0.984375 375

NODE_3077_length_374_cov_1.974922 374

NODE_3078_length_374_cov_1.833856 374

NODE_3079_length_374_cov_1.407524 374

NODE_3080_length_374_cov_1.269592 374

NODE_3081_length_373_cov_10.242138 373

NODE_3082_length_373_cov_1.823899 373

NODE_3083_length_373_cov_1.698113 373

NODE_3084_length_373_cov_1.556604 373

NODE_3085_length_373_cov_1.509434 373

NODE_3086_length_373_cov_1.342767 373

NODE_3087_length_373_cov_1.270440 373

NODE_3088_length_373_cov_1.270440 373

NODE_3089_length_373_cov_0.990566 373

NODE_3090_length_372_cov_55.091483 372

NODE_3091_length_372_cov_2.299685 372

NODE_3092_length_372_cov_2.195584 372

NODE_3093_length_372_cov_1.561514 372

NODE_3094_length_372_cov_0.848580 372

NODE_3095_length_371_cov_2.180380 371

NODE_3096_length_371_cov_2.136076 371

NODE_3097_length_371_cov_1.424051 371

NODE_3098_length_371_cov_1.424051 371

NODE_3099_length_371_cov_1.139241 371

NODE_3100_length_371_cov_1.139241 371

NODE_3101_length_371_cov_0.996835 371

NODE_3102_length_371_cov_0.981013 371

NODE_3103_length_371_cov_0.854430 371

NODE_3104_length_370_cov_209.653968 370

NODE_3105_length_370_cov_166.682540 370

NODE_3106_length_370_cov_3.717460 370

NODE_3107_length_370_cov_1.393651 370

NODE_3108_length_370_cov_1.142857 370

NODE_3109_length_370_cov_1.000000 370

NODE_3110_length_370_cov_0.955556 370

NODE_3111_length_370_cov_0.857143 370

NODE_3112_length_369_cov_2.006369 369

NODE_3113_length_369_cov_1.576433 369

NODE_3114_length_369_cov_1.515924 369

NODE_3115_length_369_cov_1.433121 369

NODE_3116_length_369_cov_1.248408 369

NODE_3117_length_369_cov_1.146497 369

NODE_3118_length_369_cov_1.146497 369

NODE_3119_length_369_cov_0.933121 369

NODE_3120_length_368_cov_60.421725 368

NODE_3121_length_368_cov_7.728435 368

NODE_3122_length_368_cov_1.725240 368

NODE_3123_length_368_cov_1.654952 368

NODE_3124_length_368_cov_1.581470 368

NODE_3125_length_368_cov_1.581470 368

NODE_3126_length_368_cov_1.437700 368

NODE_3127_length_368_cov_1.437700 368

NODE_3128_length_368_cov_1.239617 368

NODE_3129_length_368_cov_1.150160 368

NODE_3130_length_368_cov_1.006390 368

NODE_3131_length_368_cov_0.932907 368

NODE_3132_length_367_cov_1126.083333 367

NODE_3133_length_367_cov_1.730769 367

NODE_3134_length_367_cov_1.442308 367

NODE_3135_length_367_cov_1.298077 367

NODE_3136_length_367_cov_1.298077 367

NODE_3137_length_367_cov_1.298077 367

NODE_3138_length_367_cov_1.153846 367

NODE_3139_length_367_cov_1.086538 367

NODE_3140_length_367_cov_1.009615 367

NODE_3141_length_367_cov_1.009615 367

NODE_3142_length_367_cov_1.009615 367

NODE_3143_length_367_cov_1.009615 367

NODE_3144_length_367_cov_0.916667 367

NODE_3145_length_366_cov_227.729904 366

NODE_3146_length_366_cov_37.607717 366

NODE_3147_length_366_cov_27.231511 366

NODE_3148_length_366_cov_2.170418 366

NODE_3149_length_366_cov_1.736334 366

NODE_3150_length_366_cov_1.736334 366

NODE_3151_length_366_cov_1.540193 366

NODE_3152_length_366_cov_1.446945 366

NODE_3153_length_366_cov_1.302251 366

NODE_3154_length_366_cov_1.302251 366

NODE_3155_length_366_cov_1.157556 366

NODE_3156_length_365_cov_81.574194 365

NODE_3157_length_365_cov_2.032258 365

NODE_3158_length_365_cov_1.741935 365

NODE_3159_length_365_cov_1.700000 365

NODE_3160_length_365_cov_1.687097 365

NODE_3161_length_365_cov_1.664516 365

NODE_3162_length_365_cov_1.596774 365

NODE_3163_length_365_cov_1.596774 365

NODE_3164_length_365_cov_1.580645 365

NODE_3165_length_365_cov_1.451613 365

NODE_3166_length_365_cov_1.422581 365

NODE_3167_length_365_cov_1.306452 365

NODE_3168_length_365_cov_1.161290 365

NODE_3169_length_365_cov_0.870968 365

NODE_3170_length_365_cov_0.851613 365

NODE_3171_length_365_cov_0.809677 365

NODE_3172_length_364_cov_18.776699 364

NODE_3173_length_364_cov_1.954693 364

NODE_3174_length_364_cov_1.877023 364

NODE_3175_length_364_cov_1.427184 364

NODE_3176_length_364_cov_1.158576 364

NODE_3177_length_364_cov_0.873786 364

NODE_3178_length_363_cov_1.753247 363

NODE_3179_length_363_cov_1.461039 363

NODE_3180_length_363_cov_1.454545 363

NODE_3181_length_363_cov_1.314935 363

NODE_3182_length_363_cov_0.876623 363

NODE_3183_length_362_cov_200.680782 362

NODE_3184_length_362_cov_2.615635 362

NODE_3185_length_362_cov_1.612378 362

NODE_3186_length_362_cov_1.612378 362

NODE_3187_length_362_cov_1.214984 362

NODE_3188_length_362_cov_1.195440 362

NODE_3189_length_362_cov_0.879479 362

NODE_3190_length_361_cov_73.372549 361

NODE_3191_length_361_cov_2.941176 361

NODE_3192_length_361_cov_1.617647 361

NODE_3193_length_361_cov_1.470588 361

NODE_3194_length_361_cov_1.323529 361

NODE_3195_length_361_cov_0.781046 361

NODE_3196_length_361_cov_0.735294 361

NODE_3197_length_360_cov_48.822951 360

NODE_3198_length_360_cov_2.213115 360

NODE_3199_length_360_cov_1.695082 360

NODE_3200_length_360_cov_1.475410 360

NODE_3201_length_360_cov_1.180328 360

NODE_3202_length_360_cov_1.032787 360

NODE_3203_length_360_cov_1.006557 360

NODE_3204_length_360_cov_0.950820 360

NODE_3205_length_359_cov_2.072368 359

NODE_3206_length_359_cov_1.628289 359

NODE_3207_length_359_cov_1.332237 359

NODE_3208_length_359_cov_1.312500 359

NODE_3209_length_359_cov_1.233553 359

NODE_3210_length_359_cov_1.036184 359

NODE_3211_length_359_cov_1.036184 359

NODE_3212_length_359_cov_0.888158 359

NODE_3213_length_359_cov_0.881579 359

NODE_3214_length_358_cov_1.481848 358

NODE_3215_length_358_cov_1.458746 358

NODE_3216_length_358_cov_1.336634 358

NODE_3217_length_358_cov_1.316832 358

NODE_3218_length_358_cov_1.039604 358

NODE_3219_length_357_cov_143.367550 357

NODE_3220_length_357_cov_19.539735 357

NODE_3221_length_357_cov_1.639073 357

NODE_3222_length_357_cov_1.609272 357

NODE_3223_length_357_cov_1.490066 357

NODE_3224_length_357_cov_1.334437 357

NODE_3225_length_357_cov_1.331126 357

NODE_3226_length_357_cov_1.192053 357

NODE_3227_length_357_cov_1.192053 357

NODE_3228_length_357_cov_1.192053 357

NODE_3229_length_357_cov_1.192053 357

NODE_3230_length_357_cov_1.112583 357

NODE_3231_length_357_cov_1.099338 357

NODE_3232_length_357_cov_1.043046 357

NODE_3233_length_357_cov_1.043046 357

NODE_3234_length_356_cov_2349.664452 356

NODE_3235_length_356_cov_1.588040 356

NODE_3236_length_356_cov_1.571429 356

NODE_3237_length_356_cov_1.495017 356

NODE_3238_length_356_cov_1.495017 356

NODE_3239_length_356_cov_1.471761 356

NODE_3240_length_356_cov_1.196013 356

NODE_3241_length_356_cov_1.162791 356

NODE_3242_length_356_cov_0.897010 356

NODE_3243_length_355_cov_2.150000 355

NODE_3244_length_355_cov_1.950000 355

NODE_3245_length_355_cov_1.940000 355

NODE_3246_length_355_cov_1.800000 355

NODE_3247_length_355_cov_1.500000 355

NODE_3248_length_355_cov_1.350000 355

NODE_3249_length_355_cov_1.350000 355

NODE_3250_length_355_cov_1.200000 355

NODE_3251_length_355_cov_0.976667 355

NODE_3252_length_355_cov_0.663333 355

NODE_3253_length_354_cov_1.668896 354

NODE_3254_length_354_cov_1.354515 354

NODE_3255_length_354_cov_1.204013 354

NODE_3256_length_354_cov_0.903010 354

NODE_3257_length_353_cov_2.265101 353

NODE_3258_length_353_cov_1.963087 353

NODE_3259_length_353_cov_1.503356 353

NODE_3260_length_353_cov_1.483221 353

NODE_3261_length_353_cov_1.318792 353

NODE_3262_length_353_cov_1.312081 353

NODE_3263_length_353_cov_1.271812 353

NODE_3264_length_353_cov_1.197987 353

NODE_3265_length_353_cov_0.966443 353

NODE_3266_length_352_cov_133.585859 352

NODE_3267_length_352_cov_86.797980 352

NODE_3268_length_352_cov_1.060606 352

NODE_3269_length_352_cov_1.060606 352

NODE_3270_length_352_cov_0.909091 352

NODE_3271_length_352_cov_0.909091 352

NODE_3272_length_351_cov_2.432432 351

NODE_3273_length_351_cov_1.672297 351

NODE_3274_length_351_cov_1.672297 351

NODE_3275_length_351_cov_1.668919 351

NODE_3276_length_351_cov_1.520270 351

NODE_3277_length_351_cov_1.513514 351

NODE_3278_length_351_cov_1.466216 351

NODE_3279_length_351_cov_1.368243 351

NODE_3280_length_351_cov_1.216216 351

NODE_3281_length_351_cov_1.064189 351

NODE_3282_length_351_cov_1.020270 351

NODE_3283_length_351_cov_0.912162 351

NODE_3284_length_350_cov_91.030508 350

NODE_3285_length_350_cov_9.728814 350

NODE_3286_length_350_cov_1.372881 350

NODE_3287_length_350_cov_1.372881 350

NODE_3288_length_350_cov_1.349153 350

NODE_3289_length_350_cov_1.294915 350

NODE_3290_length_350_cov_0.983051 350

NODE_3291_length_349_cov_2.534014 349

NODE_3292_length_349_cov_1.925170 349

NODE_3293_length_349_cov_1.683673 349

NODE_3294_length_349_cov_1.530612 349

NODE_3295_length_349_cov_1.500000 349

NODE_3296_length_349_cov_1.377551 349

NODE_3297_length_349_cov_1.357143 349

NODE_3298_length_349_cov_1.224490 349

NODE_3299_length_349_cov_1.224490 349

NODE_3300_length_349_cov_1.224490 349

NODE_3301_length_349_cov_1.071429 349

NODE_3302_length_349_cov_0.918367 349

NODE_3303_length_349_cov_0.918367 349

NODE_3304_length_349_cov_0.891156 349

NODE_3305_length_348_cov_1.843003 348

NODE_3306_length_348_cov_1.535836 348

NODE_3307_length_348_cov_1.525597 348

NODE_3308_length_348_cov_1.228669 348

NODE_3309_length_348_cov_1.228669 348

NODE_3310_length_348_cov_1.228669 348

NODE_3311_length_348_cov_1.003413 348

NODE_3312_length_347_cov_1.955479 347

NODE_3313_length_347_cov_1.561644 347

NODE_3314_length_347_cov_1.232877 347

NODE_3315_length_347_cov_1.222603 347

NODE_3316_length_347_cov_1.078767 347

NODE_3317_length_347_cov_1.065068 347

NODE_3318_length_347_cov_0.924658 347

NODE_3319_length_347_cov_0.924658 347

NODE_3320_length_347_cov_0.770548 347

NODE_3321_length_346_cov_91.865979 346

NODE_3322_length_346_cov_32.975945 346

NODE_3323_length_346_cov_2.010309 346

NODE_3324_length_346_cov_1.694158 346

NODE_3325_length_346_cov_1.237113 346

NODE_3326_length_346_cov_1.237113 346

NODE_3327_length_346_cov_0.883162 346

NODE_3328_length_345_cov_1.396552 345

NODE_3329_length_345_cov_1.393103 345

NODE_3330_length_344_cov_1.868512 344

NODE_3331_length_344_cov_1.557093 344

NODE_3332_length_344_cov_1.401384 344

NODE_3333_length_344_cov_1.401384 344

NODE_3334_length_344_cov_1.089965 344

NODE_3335_length_344_cov_1.089965 344

NODE_3336_length_344_cov_0.913495 344

NODE_3337_length_343_cov_2.187500 343

NODE_3338_length_343_cov_1.666667 343

NODE_3339_length_343_cov_1.250000 343

NODE_3340_length_343_cov_0.902778 343

NODE_3341_length_343_cov_0.750000 343

NODE_3342_length_342_cov_58.846690 342

NODE_3343_length_342_cov_1.724739 342

NODE_3344_length_342_cov_1.567944 342

NODE_3345_length_342_cov_1.411150 342

NODE_3346_length_342_cov_1.411150 342

NODE_3347_length_342_cov_1.310105 342

NODE_3348_length_342_cov_1.254355 342

NODE_3349_length_342_cov_1.236934 342

NODE_3350_length_342_cov_1.097561 342

NODE_3351_length_342_cov_1.097561 342

NODE_3352_length_342_cov_0.937282 342

NODE_3353_length_341_cov_2.045455 341

NODE_3354_length_341_cov_1.573427 341

NODE_3355_length_341_cov_1.325175 341

NODE_3356_length_341_cov_1.206294 341

NODE_3357_length_341_cov_0.944056 341

NODE_3358_length_341_cov_0.944056 341

NODE_3359_length_341_cov_0.944056 341

NODE_3360_length_341_cov_0.944056 341

NODE_3361_length_341_cov_0.944056 341

NODE_3362_length_340_cov_2.961404 340

NODE_3363_length_340_cov_1.905263 340

NODE_3364_length_340_cov_1.526316 340

NODE_3365_length_340_cov_1.421053 340

NODE_3366_length_340_cov_1.263158 340

NODE_3367_length_340_cov_1.105263 340

NODE_3368_length_340_cov_1.105263 340

NODE_3369_length_340_cov_1.105263 340

NODE_3370_length_340_cov_0.947368 340

NODE_3371_length_340_cov_0.719298 340

NODE_3372_length_339_cov_1.584507 339

NODE_3373_length_339_cov_1.426056 339

NODE_3374_length_339_cov_1.267606 339

NODE_3375_length_339_cov_1.267606 339

NODE_3376_length_339_cov_1.165493 339

NODE_3377_length_339_cov_1.109155 339

NODE_3378_length_339_cov_1.073944 339

NODE_3379_length_339_cov_0.964789 339

NODE_3380_length_339_cov_0.792254 339

NODE_3381_length_338_cov_2.053004 338

NODE_3382_length_338_cov_1.547703 338

NODE_3383_length_338_cov_1.272085 338

NODE_3384_length_337_cov_242.574468 337

NODE_3385_length_337_cov_2.074468 337

NODE_3386_length_337_cov_1.851064 337

NODE_3387_length_337_cov_1.595745 337

NODE_3388_length_337_cov_1.276596 337

NODE_3389_length_337_cov_1.145390 337

NODE_3390_length_337_cov_1.095745 337

NODE_3391_length_337_cov_0.957447 337

NODE_3392_length_337_cov_0.957447 337

NODE_3393_length_337_cov_0.950355 337

NODE_3394_length_337_cov_0.797872 337

NODE_3395_length_336_cov_4.978648 336

NODE_3396_length_336_cov_1.441281 336

NODE_3397_length_336_cov_1.281139 336

NODE_3398_length_336_cov_1.209964 336

NODE_3399_length_336_cov_1.099644 336

NODE_3400_length_336_cov_1.064057 336

NODE_3401_length_336_cov_0.960854 336

NODE_3402_length_336_cov_0.960854 336

NODE_3403_length_336_cov_0.800712 336

NODE_3404_length_335_cov_2.228571 335

NODE_3405_length_335_cov_1.767857 335

NODE_3406_length_335_cov_1.607143 335

NODE_3407_length_335_cov_1.389286 335

NODE_3408_length_335_cov_1.285714 335

NODE_3409_length_335_cov_1.285714 335

NODE_3410_length_335_cov_1.125000 335

NODE_3411_length_335_cov_1.125000 335

NODE_3412_length_335_cov_1.125000 335

NODE_3413_length_335_cov_0.964286 335

NODE_3414_length_335_cov_0.964286 335

NODE_3415_length_335_cov_0.789286 335

NODE_3416_length_334_cov_2.096774 334

NODE_3417_length_334_cov_1.774194 334

NODE_3418_length_334_cov_1.774194 334

NODE_3419_length_334_cov_1.752688 334

NODE_3420_length_334_cov_1.612903 334

NODE_3421_length_334_cov_1.612903 334

NODE_3422_length_334_cov_1.129032 334

NODE_3423_length_334_cov_1.129032 334

NODE_3424_length_334_cov_0.967742 334

NODE_3425_length_334_cov_0.967742 334

NODE_3426_length_334_cov_0.967742 334

NODE_3427_length_334_cov_0.806452 334

NODE_3428_length_333_cov_97.219424 333

NODE_3429_length_333_cov_40.435252 333

NODE_3430_length_333_cov_2.589928 333

NODE_3431_length_333_cov_1.618705 333

NODE_3432_length_333_cov_1.618705 333

NODE_3433_length_333_cov_1.579137 333

NODE_3434_length_333_cov_1.456835 333

NODE_3435_length_333_cov_1.406475 333

NODE_3436_length_333_cov_1.294964 333

NODE_3437_length_333_cov_1.294964 333

NODE_3438_length_333_cov_1.294964 333

NODE_3439_length_333_cov_1.133094 333

NODE_3440_length_333_cov_1.133094 333

NODE_3441_length_333_cov_0.863309 333

NODE_3442_length_333_cov_0.798561 333

NODE_3443_length_332_cov_2.436823 332

NODE_3444_length_332_cov_1.624549 332

NODE_3445_length_332_cov_1.422383 332

NODE_3446_length_332_cov_1.256318 332

NODE_3447_length_332_cov_1.137184 332

NODE_3448_length_332_cov_1.010830 332

NODE_3449_length_332_cov_0.992780 332

NODE_3450_length_332_cov_0.974729 332

NODE_3451_length_332_cov_0.956679 332

NODE_3452_length_332_cov_0.855596 332

NODE_3453_length_332_cov_0.747292 332

NODE_3454_length_331_cov_922.152174 331

NODE_3455_length_331_cov_1.771739 331

NODE_3456_length_331_cov_1.467391 331

NODE_3457_length_331_cov_1.427536 331

NODE_3458_length_331_cov_1.304348 331

NODE_3459_length_331_cov_1.304348 331

NODE_3460_length_331_cov_1.141304 331

NODE_3461_length_331_cov_0.978261 331

NODE_3462_length_330_cov_1.636364 330

NODE_3463_length_330_cov_1.614545 330

NODE_3464_length_330_cov_1.472727 330

NODE_3465_length_330_cov_1.305455 330

NODE_3466_length_330_cov_1.287273 330

NODE_3467_length_330_cov_1.145455 330

NODE_3468_length_330_cov_1.072727 330

NODE_3469_length_330_cov_0.800000 330

NODE_3470_length_329_cov_26.386861 329

NODE_3471_length_329_cov_1.642336 329

NODE_3472_length_329_cov_1.569343 329

NODE_3473_length_329_cov_1.456204 329

NODE_3474_length_329_cov_1.335766 329

NODE_3475_length_329_cov_1.222628 329

NODE_3476_length_329_cov_0.967153 329

NODE_3477_length_328_cov_1.978022 328

NODE_3478_length_328_cov_1.934066 328

NODE_3479_length_328_cov_1.813187 328

NODE_3480_length_328_cov_1.794872 328

NODE_3481_length_328_cov_1.648352 328

NODE_3482_length_328_cov_1.483516 328

NODE_3483_length_328_cov_1.351648 328

NODE_3484_length_328_cov_1.318681 328

NODE_3485_length_328_cov_1.318681 328

NODE_3486_length_328_cov_1.318681 328

NODE_3487_length_328_cov_1.282051 328

NODE_3488_length_328_cov_1.153846 328

NODE_3489_length_328_cov_0.989011 328

NODE_3490_length_328_cov_0.989011 328

NODE_3491_length_328_cov_0.879121 328

NODE_3492_length_328_cov_0.824176 328

NODE_3493_length_328_cov_0.824176 328

NODE_3494_length_327_cov_2.753676 327

NODE_3495_length_327_cov_1.985294 327

NODE_3496_length_327_cov_1.985294 327

NODE_3497_length_327_cov_1.650735 327

NODE_3498_length_327_cov_1.628676 327

NODE_3499_length_327_cov_1.625000 327

NODE_3500_length_327_cov_1.488971 327

NODE_3501_length_327_cov_1.488971 327

NODE_3502_length_327_cov_1.444853 327

NODE_3503_length_327_cov_1.389706 327

NODE_3504_length_327_cov_1.312500 327

NODE_3505_length_327_cov_0.992647 327

NODE_3506_length_327_cov_0.823529 327

NODE_3507_length_326_cov_39.723247 326

NODE_3508_length_326_cov_8.535055 326

NODE_3509_length_326_cov_1.568266 326

NODE_3510_length_326_cov_1.564576 326

NODE_3511_length_326_cov_1.542435 326

NODE_3512_length_326_cov_1.494465 326

NODE_3513_length_326_cov_1.328413 326

NODE_3514_length_326_cov_1.162362 326

NODE_3515_length_326_cov_1.158672 326

NODE_3516_length_326_cov_1.066421 326

NODE_3517_length_326_cov_0.996310 326

NODE_3518_length_326_cov_0.830258 326

NODE_3519_length_326_cov_0.763838 326

NODE_3520_length_325_cov_1.666667 325

NODE_3521_length_325_cov_1.666667 325

NODE_3522_length_325_cov_1.500000 325

NODE_3523_length_325_cov_1.333333 325

NODE_3524_length_325_cov_1.166667 325

NODE_3525_length_325_cov_1.151852 325

NODE_3526_length_325_cov_1.103704 325

NODE_3527_length_325_cov_1.000000 325

NODE_3528_length_325_cov_0.733333 325

NODE_3529_length_324_cov_2.130112 324

NODE_3530_length_324_cov_1.672862 324

NODE_3531_length_324_cov_1.505576 324

NODE_3532_length_324_cov_1.505576 324

NODE_3533_length_324_cov_1.338290 324

NODE_3534_length_324_cov_1.003717 324

NODE_3535_length_323_cov_1.511194 323

NODE_3536_length_323_cov_1.291045 323

NODE_3537_length_323_cov_1.291045 323

NODE_3538_length_323_cov_1.175373 323

NODE_3539_length_323_cov_1.063433 323

NODE_3540_length_323_cov_1.007463 323

NODE_3541_length_323_cov_1.007463 323

NODE_3542_length_323_cov_1.007463 323

NODE_3543_length_323_cov_0.839552 323

NODE_3544_length_322_cov_10.880150 322

NODE_3545_length_322_cov_2.022472 322

NODE_3546_length_322_cov_2.022472 322

NODE_3547_length_322_cov_2.007491 322

NODE_3548_length_322_cov_1.685393 322

NODE_3549_length_322_cov_1.681648 322

NODE_3550_length_322_cov_1.348315 322

NODE_3551_length_322_cov_1.280899 322

NODE_3552_length_322_cov_1.179775 322

NODE_3553_length_322_cov_1.179775 322

NODE_3554_length_322_cov_1.179775 322

NODE_3555_length_322_cov_1.179775 322

NODE_3556_length_322_cov_1.153558 322

NODE_3557_length_322_cov_1.146067 322

NODE_3558_length_322_cov_1.138577 322

NODE_3559_length_322_cov_1.011236 322

NODE_3560_length_322_cov_1.011236 322

NODE_3561_length_322_cov_0.842697 322

NODE_3562_length_322_cov_0.842697 322

NODE_3563_length_321_cov_2.875940 321

NODE_3564_length_321_cov_1.860902 321

NODE_3565_length_321_cov_1.691729 321

NODE_3566_length_321_cov_1.616541 321

NODE_3567_length_321_cov_1.522556 321

NODE_3568_length_321_cov_1.184211 321

NODE_3569_length_321_cov_1.184211 321

NODE_3570_length_321_cov_1.180451 321

NODE_3571_length_321_cov_1.172932 321

NODE_3572_length_321_cov_1.015038 321

NODE_3573_length_321_cov_1.015038 321

NODE_3574_length_321_cov_1.015038 321

NODE_3575_length_320_cov_6.237736 320

NODE_3576_length_320_cov_1.698113 320

NODE_3577_length_320_cov_1.358491 320

NODE_3578_length_320_cov_1.188679 320

NODE_3579_length_320_cov_1.018868 320

NODE_3580_length_320_cov_0.954717 320

NODE_3581_length_320_cov_0.849057 320

NODE_3582_length_319_cov_2.045455 319

NODE_3583_length_319_cov_1.704545 319

NODE_3584_length_319_cov_1.522727 319

NODE_3585_length_319_cov_1.363636 319

NODE_3586_length_319_cov_1.193182 319

NODE_3587_length_319_cov_1.193182 319

NODE_3588_length_319_cov_1.022727 319

NODE_3589_length_319_cov_1.018939 319

NODE_3590_length_319_cov_0.852273 319

NODE_3591_length_318_cov_1.711027 318

NODE_3592_length_318_cov_1.368821 318

NODE_3593_length_318_cov_1.197719 318

NODE_3594_length_318_cov_1.049430 318

NODE_3595_length_318_cov_0.920152 318

NODE_3596_length_317_cov_2.232824 317

NODE_3597_length_317_cov_1.717557 317

NODE_3598_length_317_cov_1.568702 317

NODE_3599_length_317_cov_1.374046 317

NODE_3600_length_317_cov_1.187023 317

NODE_3601_length_317_cov_1.030534 317

NODE_3602_length_317_cov_0.984733 317

NODE_3603_length_317_cov_0.938931 317

NODE_3604_length_316_cov_8.570881 316

NODE_3605_length_316_cov_5.494253 316

NODE_3606_length_316_cov_1.823755 316

NODE_3607_length_316_cov_1.551724 316

NODE_3608_length_316_cov_1.383142 316

NODE_3609_length_316_cov_1.379310 316

NODE_3610_length_316_cov_1.356322 316

NODE_3611_length_316_cov_1.206897 316

NODE_3612_length_316_cov_1.034483 316

NODE_3613_length_316_cov_1.034483 316

NODE_3614_length_316_cov_1.022989 316

NODE_3615_length_316_cov_0.862069 316

NODE_3616_length_315_cov_31.584615 315

NODE_3617_length_315_cov_1.407692 315

NODE_3618_length_315_cov_1.407692 315

NODE_3619_length_315_cov_1.211538 315

NODE_3620_length_315_cov_1.200000 315

NODE_3621_length_315_cov_1.180769 315

NODE_3622_length_315_cov_1.150000 315

NODE_3623_length_315_cov_1.038462 315

NODE_3624_length_315_cov_0.865385 315

NODE_3625_length_315_cov_0.788462 315

NODE_3626_length_314_cov_2.258687 314

NODE_3627_length_314_cov_2.258687 314

NODE_3628_length_314_cov_1.737452 314

NODE_3629_length_314_cov_1.563707 314

NODE_3630_length_314_cov_1.335907 314

NODE_3631_length_314_cov_0.861004 314

NODE_3632_length_313_cov_50.957364 313

NODE_3633_length_313_cov_2.507752 313

NODE_3634_length_313_cov_1.744186 313

NODE_3635_length_313_cov_1.744186 313

NODE_3636_length_313_cov_1.744186 313

NODE_3637_length_313_cov_1.569767 313

NODE_3638_length_313_cov_1.360465 313

NODE_3639_length_313_cov_1.220930 313

NODE_3640_length_313_cov_1.220930 313

NODE_3641_length_313_cov_1.220930 313

NODE_3642_length_313_cov_1.120155 313

NODE_3643_length_313_cov_0.872093 313

NODE_3644_length_312_cov_2.284047 312

NODE_3645_length_312_cov_1.926070 312

NODE_3646_length_312_cov_1.719844 312

NODE_3647_length_312_cov_1.575875 312

NODE_3648_length_312_cov_1.575875 312

NODE_3649_length_312_cov_1.459144 312

NODE_3650_length_312_cov_1.346304 312

NODE_3651_length_312_cov_1.291829 312

NODE_3652_length_312_cov_1.050584 312

NODE_3653_length_312_cov_1.050584 312

NODE_3654_length_312_cov_1.046693 312

NODE_3655_length_312_cov_0.976654 312

NODE_3656_length_312_cov_0.953307 312

NODE_3657_length_312_cov_0.875486 312

NODE_3658_length_312_cov_0.875486 312

NODE_3659_length_312_cov_0.875486 312

NODE_3660_length_312_cov_0.801556 312

NODE_3661_length_311_cov_1.816406 311

NODE_3662_length_311_cov_1.757812 311

NODE_3663_length_311_cov_1.679688 311

NODE_3664_length_311_cov_1.582031 311

NODE_3665_length_311_cov_1.582031 311

NODE_3666_length_311_cov_1.406250 311

NODE_3667_length_311_cov_1.308594 311

NODE_3668_length_311_cov_1.230469 311

NODE_3669_length_311_cov_1.230469 311

NODE_3670_length_311_cov_1.230469 311

NODE_3671_length_311_cov_1.230469 311

NODE_3672_length_311_cov_1.046875 311

NODE_3673_length_311_cov_0.878906 311

NODE_3674_length_311_cov_0.878906 311

NODE_3675_length_311_cov_0.878906 311

NODE_3676_length_310_cov_2.117647 310

NODE_3677_length_310_cov_1.941176 310

NODE_3678_length_310_cov_1.721569 310

NODE_3679_length_310_cov_1.588235 310

NODE_3680_length_310_cov_1.411765 310

NODE_3681_length_310_cov_1.376471 310

NODE_3682_length_310_cov_1.235294 310

NODE_3683_length_310_cov_1.235294 310

NODE_3684_length_310_cov_1.223529 310

NODE_3685_length_310_cov_1.160784 310

NODE_3686_length_310_cov_1.058824 310

NODE_3687_length_310_cov_1.058824 310

NODE_3688_length_310_cov_1.058824 310

NODE_3689_length_310_cov_0.882353 310

NODE_3690_length_310_cov_0.878431 310

NODE_3691_length_309_cov_2.480315 309

NODE_3692_length_309_cov_2.303150 309

NODE_3693_length_309_cov_1.771654 309

NODE_3694_length_309_cov_1.240157 309

NODE_3695_length_309_cov_1.240157 309

NODE_3696_length_309_cov_1.062992 309

NODE_3697_length_309_cov_0.885827 309

NODE_3698_length_309_cov_0.885827 309

NODE_3699_length_309_cov_0.763780 309

NODE_3700_length_308_cov_23.146245 308

NODE_3701_length_308_cov_2.106719 308

NODE_3702_length_308_cov_1.944664 308

NODE_3703_length_308_cov_1.778656 308

NODE_3704_length_308_cov_1.600791 308

NODE_3705_length_308_cov_1.422925 308

NODE_3706_length_308_cov_1.379447 308

NODE_3707_length_308_cov_1.351779 308

NODE_3708_length_308_cov_1.347826 308

NODE_3709_length_308_cov_1.245059 308

NODE_3710_length_308_cov_1.067194 308

NODE_3711_length_308_cov_1.067194 308

NODE_3712_length_308_cov_1.067194 308

NODE_3713_length_308_cov_1.023715 308

NODE_3714_length_308_cov_1.000000 308

NODE_3715_length_308_cov_0.940711 308

NODE_3716_length_308_cov_0.711462 308

NODE_3717_length_307_cov_2.817460 307

NODE_3718_length_307_cov_2.484127 307

NODE_3719_length_307_cov_1.964286 307

NODE_3720_length_307_cov_1.607143 307

NODE_3721_length_307_cov_1.607143 307

NODE_3722_length_307_cov_1.428571 307

NODE_3723_length_307_cov_1.428571 307

NODE_3724_length_307_cov_1.357143 307

NODE_3725_length_307_cov_1.250000 307

NODE_3726_length_307_cov_1.250000 307

NODE_3727_length_307_cov_1.250000 307

NODE_3728_length_307_cov_1.250000 307

NODE_3729_length_307_cov_1.246032 307

NODE_3730_length_307_cov_1.238095 307

NODE_3731_length_307_cov_1.071429 307

NODE_3732_length_307_cov_1.071429 307

NODE_3733_length_307_cov_0.892857 307

NODE_3734_length_307_cov_0.797619 307

NODE_3735_length_307_cov_0.666667 307

NODE_3736_length_306_cov_2.322709 306

NODE_3737_length_306_cov_1.972112 306

NODE_3738_length_306_cov_1.613546 306

NODE_3739_length_306_cov_1.422311 306

NODE_3740_length_306_cov_1.254980 306

NODE_3741_length_306_cov_1.254980 306

NODE_3742_length_306_cov_1.075697 306

NODE_3743_length_306_cov_1.075697 306

NODE_3744_length_306_cov_1.075697 306

NODE_3745_length_306_cov_0.896414 306

NODE_3746_length_306_cov_0.852590 306

NODE_3747_length_306_cov_0.685259 306

NODE_3748_length_305_cov_5878.076000 305

NODE_3749_length_305_cov_2.144000 305

NODE_3750_length_305_cov_1.844000 305

NODE_3751_length_305_cov_1.200000 305

NODE_3752_length_305_cov_1.080000 305

NODE_3753_length_305_cov_0.900000 305

NODE_3754_length_305_cov_0.900000 305

NODE_3755_length_305_cov_0.900000 305

NODE_3756_length_305_cov_0.800000 305

NODE_3757_length_304_cov_2.369478 304

NODE_3758_length_304_cov_2.168675 304

NODE_3759_length_304_cov_1.963855 304

NODE_3760_length_304_cov_1.265060 304

NODE_3761_length_304_cov_1.084337 304

NODE_3762_length_304_cov_1.080321 304

NODE_3763_length_304_cov_1.076305 304

NODE_3764_length_304_cov_0.903614 304

NODE_3765_length_304_cov_0.903614 304

NODE_3766_length_303_cov_125.354839 303

NODE_3767_length_303_cov_18.379032 303

NODE_3768_length_303_cov_6.798387 303

NODE_3769_length_303_cov_1.979839 303

NODE_3770_length_303_cov_0.907258 303

NODE_3771_length_302_cov_1.639676 302

NODE_3772_length_302_cov_1.639676 302

NODE_3773_length_302_cov_1.429150 302

NODE_3774_length_302_cov_1.275304 302

NODE_3775_length_302_cov_1.218623 302

NODE_3776_length_302_cov_1.093117 302

NODE_3777_length_302_cov_1.076923 302

NODE_3778_length_302_cov_0.910931 302

NODE_3779_length_302_cov_0.647773 302

NODE_3780_length_301_cov_35.723577 301

NODE_3781_length_301_cov_2.012195 301

NODE_3782_length_301_cov_1.829268 301

NODE_3783_length_301_cov_1.626016 301

NODE_3784_length_301_cov_1.463415 301

NODE_3785_length_301_cov_1.463415 301

NODE_3786_length_301_cov_0.691057 301

NODE_3787_length_300_cov_2.195918 300

NODE_3788_length_300_cov_1.836735 300

NODE_3789_length_300_cov_1.285714 300

NODE_3790_length_300_cov_1.285714 300

NODE_3791_length_300_cov_1.102041 300

NODE_3792_length_300_cov_1.102041 300

NODE_3793_length_300_cov_1.102041 300

NODE_3794_length_300_cov_0.918367 300

NODE_3795_length_300_cov_0.734694 300

NODE_3796_length_300_cov_0.718367 300

NODE_3797_length_299_cov_2.397541 299

NODE_3798_length_299_cov_2.028689 299

NODE_3799_length_299_cov_1.844262 299

NODE_3800_length_299_cov_1.659836 299

NODE_3801_length_299_cov_1.475410 299

NODE_3802_length_299_cov_1.475410 299

NODE_3803_length_299_cov_1.418033 299

NODE_3804_length_299_cov_1.290984 299

NODE_3805_length_299_cov_1.106557 299

NODE_3806_length_299_cov_0.922131 299

NODE_3807_length_299_cov_0.922131 299

NODE_3808_length_298_cov_104.716049 298

NODE_3809_length_298_cov_2.502058 298

NODE_3810_length_298_cov_1.851852 298

NODE_3811_length_298_cov_1.353909 298

NODE_3812_length_298_cov_1.296296 298

NODE_3813_length_298_cov_1.275720 298

NODE_3814_length_298_cov_1.263374 298

NODE_3815_length_298_cov_1.111111 298

NODE_3816_length_298_cov_1.111111 298

NODE_3817_length_298_cov_1.111111 298

NODE_3818_length_297_cov_12.280992 297

NODE_3819_length_297_cov_1.673554 297

NODE_3820_length_297_cov_1.673554 297

NODE_3821_length_297_cov_1.669421 297

NODE_3822_length_297_cov_1.400826 297

NODE_3823_length_297_cov_1.144628 297

NODE_3824_length_297_cov_1.115702 297

NODE_3825_length_297_cov_1.115702 297

NODE_3826_length_297_cov_1.115702 297

NODE_3827_length_297_cov_1.115702 297

NODE_3828_length_297_cov_1.115702 297

NODE_3829_length_297_cov_1.095041 297

NODE_3830_length_297_cov_0.743802 297

NODE_3831_length_297_cov_0.677686 297

NODE_3832_length_296_cov_2.390041 296

NODE_3833_length_296_cov_1.867220 296

NODE_3834_length_296_cov_1.867220 296

NODE_3835_length_296_cov_1.489627 296

NODE_3836_length_296_cov_1.307054 296

NODE_3837_length_296_cov_1.307054 296

NODE_3838_length_296_cov_1.120332 296

NODE_3839_length_296_cov_1.120332 296

NODE_3840_length_296_cov_0.933610 296

NODE_3841_length_296_cov_0.933610 296

NODE_3842_length_296_cov_0.933610 296

NODE_3843_length_296_cov_0.676349 296

NODE_3844_length_295_cov_2.062500 295

NODE_3845_length_295_cov_2.062500 295

NODE_3846_length_295_cov_1.970833 295

NODE_3847_length_295_cov_1.829167 295

NODE_3848_length_295_cov_1.795833 295

NODE_3849_length_295_cov_1.750000 295

NODE_3850_length_295_cov_1.687500 295

NODE_3851_length_295_cov_1.662500 295

NODE_3852_length_295_cov_1.520833 295

NODE_3853_length_295_cov_1.500000 295

NODE_3854_length_295_cov_1.500000 295

NODE_3855_length_295_cov_1.500000 295

NODE_3856_length_295_cov_1.500000 295

NODE_3857_length_295_cov_1.312500 295

NODE_3858_length_295_cov_1.125000 295

NODE_3859_length_295_cov_1.120833 295

NODE_3860_length_295_cov_1.058333 295

NODE_3861_length_295_cov_0.937500 295

NODE_3862_length_295_cov_0.937500 295

NODE_3863_length_295_cov_0.879167 295

NODE_3864_length_294_cov_159.171548 294

NODE_3865_length_294_cov_22.765690 294

NODE_3866_length_294_cov_2.259414 294

NODE_3867_length_294_cov_2.259414 294

NODE_3868_length_294_cov_1.849372 294

NODE_3869_length_294_cov_1.836820 294

NODE_3870_length_294_cov_1.694561 294

NODE_3871_length_294_cov_1.506276 294

NODE_3872_length_294_cov_1.481172 294

NODE_3873_length_294_cov_1.317992 294

NODE_3874_length_294_cov_1.284519 294

NODE_3875_length_294_cov_1.129707 294

NODE_3876_length_294_cov_1.125523 294

NODE_3877_length_294_cov_1.121339 294

NODE_3878_length_294_cov_1.083682 294

NODE_3879_length_294_cov_0.920502 294

NODE_3880_length_294_cov_0.753138 294

NODE_3881_length_293_cov_1.701681 293

NODE_3882_length_293_cov_1.512605 293

NODE_3883_length_293_cov_1.512605 293

NODE_3884_length_293_cov_1.323529 293

NODE_3885_length_293_cov_1.323529 293

NODE_3886_length_293_cov_1.134454 293

NODE_3887_length_293_cov_1.134454 293

NODE_3888_length_293_cov_1.088235 293

NODE_3889_length_293_cov_0.945378 293

NODE_3890_length_292_cov_18.818565 292

NODE_3891_length_292_cov_2.472574 292

NODE_3892_length_292_cov_2.088608 292

NODE_3893_length_292_cov_1.708861 292

NODE_3894_length_292_cov_1.708861 292

NODE_3895_length_292_cov_1.476793 292

NODE_3896_length_292_cov_1.337553 292

NODE_3897_length_292_cov_1.329114 292

NODE_3898_length_292_cov_1.139241 292

NODE_3899_length_292_cov_0.949367 292

NODE_3900_length_292_cov_0.949367 292

NODE_3901_length_292_cov_0.932489 292

NODE_3902_length_292_cov_0.759494 292

NODE_3903_length_291_cov_16.127119 291

NODE_3904_length_291_cov_2.927966 291

NODE_3905_length_291_cov_1.144068 291

NODE_3906_length_291_cov_0.953390 291

NODE_3907_length_291_cov_0.919492 291

NODE_3908_length_291_cov_0.762712 291

NODE_3909_length_290_cov_1.782979 290

NODE_3910_length_290_cov_1.148936 290

NODE_3911_length_290_cov_1.148936 290

NODE_3912_length_290_cov_0.957447 290

NODE_3913_length_290_cov_0.957447 290

NODE_3914_length_290_cov_0.948936 290

NODE_3915_length_290_cov_0.821277 290

NODE_3916_length_290_cov_0.765957 290

NODE_3917_length_290_cov_0.765957 290

NODE_3918_length_289_cov_36.290598 289

NODE_3919_length_289_cov_2.388889 289

NODE_3920_length_289_cov_1.653846 289

NODE_3921_length_289_cov_1.538462 289

NODE_3922_length_289_cov_1.461538 289

NODE_3923_length_289_cov_1.346154 289

NODE_3924_length_289_cov_1.333333 289

NODE_3925_length_289_cov_1.153846 289

NODE_3926_length_289_cov_1.145299 289

NODE_3927_length_289_cov_1.106838 289

NODE_3928_length_289_cov_1.098291 289

NODE_3929_length_289_cov_0.961538 289

NODE_3930_length_289_cov_0.876068 289

NODE_3931_length_289_cov_0.769231 289

NODE_3932_length_288_cov_2.158798 288

NODE_3933_length_288_cov_1.738197 288

NODE_3934_length_288_cov_1.738197 288

NODE_3935_length_288_cov_1.545064 288

NODE_3936_length_288_cov_1.351931 288

NODE_3937_length_288_cov_1.351931 288

NODE_3938_length_288_cov_1.351931 288

NODE_3939_length_288_cov_1.351931 288

NODE_3940_length_288_cov_1.158798 288

NODE_3941_length_288_cov_1.111588 288

NODE_3942_length_288_cov_1.008584 288

NODE_3943_length_288_cov_0.995708 288

NODE_3944_length_288_cov_0.965665 288

NODE_3945_length_288_cov_0.965665 288

NODE_3946_length_288_cov_0.965665 288

NODE_3947_length_288_cov_0.965665 288

NODE_3948_length_288_cov_0.832618 288

NODE_3949_length_288_cov_0.772532 288

NODE_3950_length_288_cov_0.682403 288

NODE_3951_length_287_cov_2.426724 287

NODE_3952_length_287_cov_1.745690 287

NODE_3953_length_287_cov_1.745690 287

NODE_3954_length_287_cov_1.689655 287

NODE_3955_length_287_cov_1.409483 287

NODE_3956_length_287_cov_1.357759 287

NODE_3957_length_287_cov_1.357759 287

NODE_3958_length_287_cov_1.163793 287

NODE_3959_length_287_cov_1.142241 287

NODE_3960_length_287_cov_0.969828 287

NODE_3961_length_286_cov_1.891775 286

NODE_3962_length_286_cov_1.844156 286

NODE_3963_length_286_cov_1.558442 286

NODE_3964_length_286_cov_1.506494 286

NODE_3965_length_286_cov_1.450216 286

NODE_3966_length_286_cov_1.363636 286

NODE_3967_length_286_cov_1.168831 286

NODE_3968_length_286_cov_0.974026 286

NODE_3969_length_286_cov_0.974026 286

NODE_3970_length_286_cov_0.974026 286

NODE_3971_length_286_cov_0.974026 286

NODE_3972_length_286_cov_0.779221 286

NODE_3973_length_286_cov_0.779221 286

NODE_3974_length_286_cov_0.761905 286

NODE_3975_length_285_cov_1.686957 285

NODE_3976_length_285_cov_1.495652 285

NODE_3977_length_285_cov_1.369565 285

NODE_3978_length_285_cov_1.360870 285

NODE_3979_length_285_cov_1.173913 285

NODE_3980_length_285_cov_0.978261 285

NODE_3981_length_285_cov_0.978261 285

NODE_3982_length_285_cov_0.952174 285

NODE_3983_length_285_cov_0.808696 285

NODE_3984_length_285_cov_0.782609 285

NODE_3985_length_285_cov_0.782609 285

NODE_3986_length_285_cov_0.734783 285

NODE_3987_length_285_cov_0.721739 285

NODE_3988_length_285_cov_0.643478 285

NODE_3989_length_284_cov_1.572052 284

NODE_3990_length_284_cov_1.375546 284

NODE_3991_length_284_cov_1.375546 284

NODE_3992_length_284_cov_1.179039 284

NODE_3993_length_284_cov_1.179039 284

NODE_3994_length_284_cov_0.982533 284

NODE_3995_length_284_cov_0.982533 284

NODE_3996_length_284_cov_0.969432 284

NODE_3997_length_284_cov_0.838428 284

NODE_3998_length_284_cov_0.786026 284

NODE_3999_length_284_cov_0.786026 284

NODE_4000_length_283_cov_2.197368 283

NODE_4001_length_283_cov_1.776316 283

NODE_4002_length_283_cov_1.657895 283

NODE_4003_length_283_cov_1.184211 283

NODE_4004_length_283_cov_1.184211 283

NODE_4005_length_283_cov_1.184211 283

NODE_4006_length_283_cov_1.184211 283

NODE_4007_length_283_cov_1.153509 283

NODE_4008_length_283_cov_0.986842 283

NODE_4009_length_283_cov_0.986842 283

NODE_4010_length_282_cov_1.920705 282

NODE_4011_length_282_cov_1.585903 282

NODE_4012_length_282_cov_1.585903 282

NODE_4013_length_282_cov_1.387665 282

NODE_4014_length_282_cov_0.845815 282

NODE_4015_length_281_cov_4596.331858 281

NODE_4016_length_281_cov_1.991150 281

NODE_4017_length_281_cov_1.792035 281

NODE_4018_length_281_cov_1.637168 281

NODE_4019_length_281_cov_1.194690 281

NODE_4020_length_281_cov_1.194690 281

NODE_4021_length_281_cov_1.181416 281

NODE_4022_length_281_cov_1.150442 281

NODE_4023_length_281_cov_0.995575 281

NODE_4024_length_281_cov_0.995575 281

NODE_4025_length_281_cov_0.995575 281

NODE_4026_length_281_cov_0.995575 281

NODE_4027_length_281_cov_0.995575 281

NODE_4028_length_281_cov_0.796460 281

NODE_4029_length_280_cov_1.400000 280

NODE_4030_length_280_cov_1.368889 280

NODE_4031_length_280_cov_1.200000 280

NODE_4032_length_280_cov_1.200000 280

NODE_4033_length_280_cov_1.200000 280

NODE_4034_length_280_cov_1.200000 280

NODE_4035_length_280_cov_1.200000 280

NODE_4036_length_280_cov_1.000000 280

NODE_4037_length_280_cov_1.000000 280

NODE_4038_length_280_cov_1.000000 280

NODE_4039_length_280_cov_1.000000 280

NODE_4040_length_280_cov_1.000000 280

NODE_4041_length_280_cov_0.800000 280

NODE_4042_length_280_cov_0.800000 280

NODE_4043_length_279_cov_5.263393 279

NODE_4044_length_279_cov_3.133929 279

NODE_4045_length_279_cov_2.696429 279

NODE_4046_length_279_cov_2.209821 279

NODE_4047_length_279_cov_1.808036 279

NODE_4048_length_279_cov_1.584821 279

NODE_4049_length_279_cov_1.406250 279

NODE_4050_length_279_cov_1.205357 279

NODE_4051_length_279_cov_1.205357 279

NODE_4052_length_279_cov_1.205357 279

NODE_4053_length_279_cov_1.004464 279

NODE_4054_length_279_cov_1.004464 279

NODE_4055_length_279_cov_1.004464 279

NODE_4056_length_279_cov_1.004464 279

NODE_4057_length_279_cov_0.803571 279

NODE_4058_length_279_cov_0.803571 279

NODE_4059_length_279_cov_0.803571 279

NODE_4060_length_278_cov_1.816143 278

NODE_4061_length_278_cov_1.816143 278

NODE_4062_length_278_cov_1.802691 278

NODE_4063_length_278_cov_1.717489 278

NODE_4064_length_278_cov_1.695067 278

NODE_4065_length_278_cov_1.210762 278

NODE_4066_length_278_cov_1.210762 278

NODE_4067_length_278_cov_1.210762 278

NODE_4068_length_278_cov_1.058296 278

NODE_4069_length_278_cov_1.013453 278

NODE_4070_length_278_cov_1.008969 278

NODE_4071_length_278_cov_1.008969 278

NODE_4072_length_278_cov_1.008969 278

NODE_4073_length_278_cov_1.008969 278

NODE_4074_length_278_cov_1.008969 278

NODE_4075_length_278_cov_1.008969 278

NODE_4076_length_278_cov_0.968610 278

NODE_4077_length_278_cov_0.959641 278

NODE_4078_length_278_cov_0.807175 278

NODE_4079_length_278_cov_0.807175 278

NODE_4080_length_278_cov_0.807175 278

NODE_4081_length_277_cov_69.360360 277

NODE_4082_length_277_cov_1.824324 277

NODE_4083_length_277_cov_1.815315 277

NODE_4084_length_277_cov_1.612613 277

NODE_4085_length_277_cov_1.418919 277

NODE_4086_length_277_cov_1.216216 277

NODE_4087_length_277_cov_1.013514 277

NODE_4088_length_277_cov_1.013514 277

NODE_4089_length_277_cov_1.013514 277

NODE_4090_length_277_cov_0.819820 277

NODE_4091_length_277_cov_0.810811 277

NODE_4092_length_277_cov_0.810811 277

NODE_4093_length_277_cov_0.810811 277

NODE_4094_length_276_cov_8.687783 276

NODE_4095_length_276_cov_2.389140 276

NODE_4096_length_276_cov_2.167421 276

NODE_4097_length_276_cov_1.832579 276

NODE_4098_length_276_cov_1.800905 276

NODE_4099_length_276_cov_1.628959 276

NODE_4100_length_276_cov_1.574661 276

NODE_4101_length_276_cov_1.425339 276

NODE_4102_length_276_cov_1.425339 276

NODE_4103_length_276_cov_1.425339 276

NODE_4104_length_276_cov_1.420814 276

NODE_4105_length_276_cov_1.235294 276

NODE_4106_length_276_cov_1.221719 276

NODE_4107_length_276_cov_1.221719 276

NODE_4108_length_276_cov_1.217195 276

NODE_4109_length_276_cov_1.203620 276

NODE_4110_length_276_cov_1.018100 276

NODE_4111_length_276_cov_0.814480 276

NODE_4112_length_276_cov_0.814480 276

NODE_4113_length_276_cov_0.746606 276

NODE_4114_length_275_cov_1.840909 275

NODE_4115_length_275_cov_1.545455 275

NODE_4116_length_275_cov_1.372727 275

NODE_4117_length_275_cov_1.300000 275

NODE_4118_length_275_cov_1.254545 275

NODE_4119_length_275_cov_1.227273 275

NODE_4120_length_275_cov_1.227273 275

NODE_4121_length_275_cov_1.227273 275

NODE_4122_length_275_cov_1.022727 275

NODE_4123_length_275_cov_1.018182 275

NODE_4124_length_275_cov_0.850000 275

NODE_4125_length_275_cov_0.818182 275

NODE_4126_length_275_cov_0.818182 275

NODE_4127_length_274_cov_74.315068 274

NODE_4128_length_274_cov_2.054795 274

NODE_4129_length_274_cov_1.643836 274

NODE_4130_length_274_cov_1.438356 274

NODE_4131_length_274_cov_1.438356 274

NODE_4132_length_274_cov_1.232877 274

NODE_4133_length_274_cov_1.232877 274

NODE_4134_length_274_cov_1.232877 274

NODE_4135_length_274_cov_1.232877 274

NODE_4136_length_274_cov_1.232877 274

NODE_4137_length_274_cov_1.232877 274

NODE_4138_length_274_cov_1.232877 274

NODE_4139_length_274_cov_1.232877 274

NODE_4140_length_274_cov_1.031963 274

NODE_4141_length_274_cov_1.027397 274

NODE_4142_length_274_cov_1.027397 274

NODE_4143_length_274_cov_1.027397 274

NODE_4144_length_274_cov_1.027397 274

NODE_4145_length_274_cov_0.968037 274

NODE_4146_length_274_cov_0.949772 274

NODE_4147_length_274_cov_0.821918 274

NODE_4148_length_274_cov_0.821918 274

NODE_4149_length_274_cov_0.611872 274

NODE_4150_length_273_cov_1.889908 273

NODE_4151_length_273_cov_1.839450 273

NODE_4152_length_273_cov_1.651376 273

NODE_4153_length_273_cov_1.651376 273

NODE_4154_length_273_cov_1.642202 273

NODE_4155_length_273_cov_1.444954 273

NODE_4156_length_273_cov_1.440367 273

NODE_4157_length_273_cov_1.238532 273

NODE_4158_length_273_cov_1.238532 273

NODE_4159_length_273_cov_1.178899 273

NODE_4160_length_273_cov_0.981651 273

NODE_4161_length_273_cov_0.825688 273

NODE_4162_length_273_cov_0.825688 273

NODE_4163_length_273_cov_0.825688 273

NODE_4164_length_273_cov_0.683486 273

NODE_4165_length_273_cov_0.665138 273

NODE_4166_length_272_cov_2.073733 272

NODE_4167_length_272_cov_1.866359 272

NODE_4168_length_272_cov_1.451613 272

NODE_4169_length_272_cov_1.451613 272

NODE_4170_length_272_cov_1.451613 272

NODE_4171_length_272_cov_1.313364 272

NODE_4172_length_272_cov_1.244240 272

NODE_4173_length_272_cov_1.244240 272

NODE_4174_length_272_cov_1.244240 272

NODE_4175_length_272_cov_1.124424 272

NODE_4176_length_272_cov_1.036866 272

NODE_4177_length_272_cov_1.036866 272

NODE_4178_length_272_cov_1.023041 272

NODE_4179_length_272_cov_0.829493 272

NODE_4180_length_272_cov_0.829493 272

NODE_4181_length_272_cov_0.778802 272

NODE_4182_length_271_cov_1.875000 271

NODE_4183_length_271_cov_1.615741 271

NODE_4184_length_271_cov_1.458333 271

NODE_4185_length_271_cov_1.458333 271

NODE_4186_length_271_cov_1.250000 271

NODE_4187_length_271_cov_1.250000 271

NODE_4188_length_271_cov_1.041667 271

NODE_4189_length_271_cov_1.041667 271

NODE_4190_length_270_cov_1.418605 270

NODE_4191_length_270_cov_1.306977 270

NODE_4192_length_270_cov_1.255814 270

NODE_4193_length_270_cov_1.255814 270

NODE_4194_length_270_cov_1.088372 270

NODE_4195_length_270_cov_1.046512 270

NODE_4196_length_270_cov_1.046512 270

NODE_4197_length_270_cov_1.046512 270

NODE_4198_length_270_cov_1.013953 270

NODE_4199_length_270_cov_0.990698 270

NODE_4200_length_270_cov_0.981395 270

NODE_4201_length_270_cov_0.837209 270

NODE_4202_length_270_cov_0.734884 270

NODE_4203_length_269_cov_1.682243 269

NODE_4204_length_269_cov_1.532710 269

NODE_4205_length_269_cov_1.471963 269

NODE_4206_length_269_cov_1.471963 269

NODE_4207_length_269_cov_1.224299 269

NODE_4208_length_269_cov_1.051402 269

NODE_4209_length_269_cov_1.051402 269

NODE_4210_length_269_cov_1.009346 269

NODE_4211_length_269_cov_0.841121 269

NODE_4212_length_269_cov_0.841121 269

NODE_4213_length_269_cov_0.841121 269

NODE_4214_length_269_cov_0.752336 269

NODE_4215_length_268_cov_91.840376 268

NODE_4216_length_268_cov_13.478873 268

NODE_4217_length_268_cov_2.356808 268

NODE_4218_length_268_cov_2.112676 268

NODE_4219_length_268_cov_2.000000 268

NODE_4220_length_268_cov_1.690141 268

NODE_4221_length_268_cov_1.690141 268

NODE_4222_length_268_cov_1.478873 268

NODE_4223_length_268_cov_1.478873 268

NODE_4224_length_268_cov_1.446009 268

NODE_4225_length_268_cov_1.267606 268

NODE_4226_length_268_cov_1.267606 268

NODE_4227_length_268_cov_1.234742 268

NODE_4228_length_268_cov_1.197183 268

NODE_4229_length_268_cov_1.056338 268

NODE_4230_length_268_cov_1.056338 268

NODE_4231_length_268_cov_1.056338 268

NODE_4232_length_268_cov_1.056338 268

NODE_4233_length_268_cov_1.056338 268

NODE_4234_length_268_cov_0.967136 268

NODE_4235_length_268_cov_0.845070 268

NODE_4236_length_268_cov_0.845070 268

NODE_4237_length_268_cov_0.845070 268

NODE_4238_length_268_cov_0.798122 268

NODE_4239_length_268_cov_0.629108 268

NODE_4240_length_267_cov_1.698113 267

NODE_4241_length_267_cov_1.415094 267

NODE_4242_length_267_cov_1.391509 267

NODE_4243_length_267_cov_1.273585 267

NODE_4244_length_267_cov_1.273585 267

NODE_4245_length_267_cov_1.273585 267

NODE_4246_length_267_cov_1.273585 267

NODE_4247_length_267_cov_1.273585 267

NODE_4248_length_267_cov_1.273585 267

NODE_4249_length_267_cov_1.061321 267

NODE_4250_length_267_cov_0.971698 267

NODE_4251_length_267_cov_0.896226 267

NODE_4252_length_267_cov_0.849057 267

NODE_4253_length_267_cov_0.849057 267

NODE_4254_length_267_cov_0.849057 267

NODE_4255_length_267_cov_0.745283 267

NODE_4256_length_267_cov_0.702830 267

NODE_4257_length_266_cov_157.151659 266

NODE_4258_length_266_cov_1.919431 266

NODE_4259_length_266_cov_1.492891 266

NODE_4260_length_266_cov_1.492891 266

NODE_4261_length_266_cov_1.279621 266

NODE_4262_length_266_cov_1.279621 266

NODE_4263_length_266_cov_1.279621 266

NODE_4264_length_266_cov_1.066351 266

NODE_4265_length_266_cov_1.066351 266

NODE_4266_length_266_cov_1.066351 266

NODE_4267_length_266_cov_1.066351 266

NODE_4268_length_266_cov_0.853081 266

NODE_4269_length_266_cov_0.853081 266

NODE_4270_length_266_cov_0.853081 266

NODE_4271_length_266_cov_0.791469 266

NODE_4272_length_266_cov_0.706161 266

NODE_4273_length_265_cov_239.242857 265

NODE_4274_length_265_cov_2.142857 265

NODE_4275_length_265_cov_1.947619 265

NODE_4276_length_265_cov_1.604762 265

NODE_4277_length_265_cov_1.519048 265

NODE_4278_length_265_cov_1.500000 265

NODE_4279_length_265_cov_1.500000 265

NODE_4280_length_265_cov_1.500000 265

NODE_4281_length_265_cov_1.285714 265

NODE_4282_length_265_cov_1.209524 265

NODE_4283_length_265_cov_1.204762 265

NODE_4284_length_265_cov_1.071429 265

NODE_4285_length_265_cov_1.071429 265

NODE_4286_length_265_cov_1.071429 265

NODE_4287_length_265_cov_1.071429 265

NODE_4288_length_265_cov_0.857143 265

NODE_4289_length_264_cov_50.655502 264

NODE_4290_length_264_cov_19.760766 264

NODE_4291_length_264_cov_2.617225 264

NODE_4292_length_264_cov_1.937799 264

NODE_4293_length_264_cov_1.937799 264

NODE_4294_length_264_cov_1.722488 264

NODE_4295_length_264_cov_1.669856 264

NODE_4296_length_264_cov_1.665072 264

NODE_4297_length_264_cov_1.507177 264

NODE_4298_length_264_cov_1.377990 264

NODE_4299_length_264_cov_1.291866 264

NODE_4300_length_264_cov_1.291866 264

NODE_4301_length_264_cov_1.076555 264

NODE_4302_length_264_cov_1.076555 264

NODE_4303_length_264_cov_1.076555 264

NODE_4304_length_264_cov_1.076555 264

NODE_4305_length_264_cov_1.066986 264

NODE_4306_length_264_cov_0.861244 264

NODE_4307_length_264_cov_0.861244 264

NODE_4308_length_264_cov_0.861244 264

NODE_4309_length_263_cov_127.288462 263

NODE_4310_length_263_cov_10.500000 263

NODE_4311_length_263_cov_2.076923 263

NODE_4312_length_263_cov_1.730769 263

NODE_4313_length_263_cov_1.514423 263

NODE_4314_length_263_cov_1.514423 263

NODE_4315_length_263_cov_1.509615 263

NODE_4316_length_263_cov_1.298077 263

NODE_4317_length_263_cov_1.081731 263

NODE_4318_length_263_cov_1.081731 263

NODE_4319_length_263_cov_1.081731 263

NODE_4320_length_263_cov_1.081731 263

NODE_4321_length_263_cov_1.072115 263

NODE_4322_length_263_cov_1.009615 263

NODE_4323_length_263_cov_0.980769 263

NODE_4324_length_263_cov_0.865385 263

NODE_4325_length_263_cov_0.865385 263

NODE_4326_length_263_cov_0.865385 263

NODE_4327_length_263_cov_0.865385 263

NODE_4328_length_263_cov_0.653846 263

NODE_4329_length_262_cov_1.739130 262

NODE_4330_length_262_cov_1.739130 262

NODE_4331_length_262_cov_1.739130 262

NODE_4332_length_262_cov_1.710145 262

NODE_4333_length_262_cov_1.521739 262

NODE_4334_length_262_cov_1.449275 262

NODE_4335_length_262_cov_1.304348 262

NODE_4336_length_262_cov_1.304348 262

NODE_4337_length_262_cov_1.304348 262

NODE_4338_length_262_cov_1.086957 262

NODE_4339_length_262_cov_1.086957 262

NODE_4340_length_262_cov_1.086957 262

NODE_4341_length_262_cov_1.086957 262

NODE_4342_length_262_cov_1.072464 262

NODE_4343_length_262_cov_1.067633 262

NODE_4344_length_262_cov_1.009662 262

NODE_4345_length_262_cov_0.966184 262

NODE_4346_length_262_cov_0.913043 262

NODE_4347_length_262_cov_0.869565 262

NODE_4348_length_262_cov_0.869565 262

NODE_4349_length_261_cov_53.446602 261

NODE_4350_length_261_cov_7.771845 261

NODE_4351_length_261_cov_7.189320 261

NODE_4352_length_261_cov_1.669903 261

NODE_4353_length_261_cov_1.529126 261

NODE_4354_length_261_cov_1.359223 261

NODE_4355_length_261_cov_1.310680 261

NODE_4356_length_261_cov_1.310680 261

NODE_4357_length_261_cov_1.310680 261

NODE_4358_length_261_cov_1.237864 261

NODE_4359_length_261_cov_1.092233 261

NODE_4360_length_261_cov_1.087379 261

NODE_4361_length_261_cov_1.077670 261

NODE_4362_length_261_cov_1.029126 261

NODE_4363_length_261_cov_0.873786 261

NODE_4364_length_261_cov_0.873786 261

NODE_4365_length_261_cov_0.873786 261

NODE_4366_length_261_cov_0.873786 261

NODE_4367_length_261_cov_0.776699 261

NODE_4368_length_260_cov_2.287805 260

NODE_4369_length_260_cov_1.975610 260

NODE_4370_length_260_cov_1.965854 260

NODE_4371_length_260_cov_1.756098 260

NODE_4372_length_260_cov_1.736585 260

NODE_4373_length_260_cov_1.536585 260

NODE_4374_length_260_cov_1.317073 260

NODE_4375_length_260_cov_1.263415 260

NODE_4376_length_260_cov_1.112195 260

NODE_4377_length_260_cov_1.097561 260

NODE_4378_length_260_cov_1.097561 260

NODE_4379_length_260_cov_1.097561 260

NODE_4380_length_260_cov_1.097561 260

NODE_4381_length_260_cov_0.878049 260

NODE_4382_length_260_cov_0.878049 260

NODE_4383_length_260_cov_0.878049 260

NODE_4384_length_259_cov_2.117647 259

NODE_4385_length_259_cov_1.544118 259

NODE_4386_length_259_cov_1.323529 259

NODE_4387_length_259_cov_1.323529 259

NODE_4388_length_259_cov_1.264706 259

NODE_4389_length_259_cov_1.102941 259

NODE_4390_length_259_cov_1.102941 259

NODE_4391_length_259_cov_1.102941 259

NODE_4392_length_259_cov_0.882353 259

NODE_4393_length_259_cov_0.882353 259

NODE_4394_length_259_cov_0.882353 259

NODE_4395_length_258_cov_121.019704 258

NODE_4396_length_258_cov_1.995074 258

NODE_4397_length_258_cov_1.773399 258

NODE_4398_length_258_cov_1.773399 258

NODE_4399_length_258_cov_1.551724 258

NODE_4400_length_258_cov_1.551724 258

NODE_4401_length_258_cov_1.487685 258

NODE_4402_length_258_cov_1.330049 258

NODE_4403_length_258_cov_1.330049 258

NODE_4404_length_258_cov_1.266010 258

NODE_4405_length_258_cov_1.108374 258

NODE_4406_length_258_cov_1.049261 258

NODE_4407_length_258_cov_1.024631 258

NODE_4408_length_258_cov_0.960591 258

NODE_4409_length_258_cov_0.886700 258

NODE_4410_length_258_cov_0.886700 258

NODE_4411_length_258_cov_0.714286 258

NODE_4412_length_257_cov_1.782178 257

NODE_4413_length_257_cov_1.559406 257

NODE_4414_length_257_cov_1.336634 257

NODE_4415_length_257_cov_1.336634 257

NODE_4416_length_257_cov_1.336634 257

NODE_4417_length_257_cov_1.113861 257

NODE_4418_length_257_cov_0.891089 257

NODE_4419_length_257_cov_0.891089 257

NODE_4420_length_256_cov_2.910448 256

NODE_4421_length_256_cov_2.014925 256

NODE_4422_length_256_cov_1.791045 256

NODE_4423_length_256_cov_1.791045 256

NODE_4424_length_256_cov_1.641791 256

NODE_4425_length_256_cov_1.343284 256

NODE_4426_length_256_cov_1.343284 256

NODE_4427_length_256_cov_1.293532 256

NODE_4428_length_256_cov_1.119403 256

NODE_4429_length_256_cov_1.119403 256

NODE_4430_length_256_cov_1.119403 256

NODE_4431_length_256_cov_0.895522 256

NODE_4432_length_256_cov_0.895522 256

NODE_4433_length_256_cov_0.895522 256

NODE_4434_length_256_cov_0.895522 256

NODE_4435_length_256_cov_0.825871 256

NODE_4436_length_256_cov_0.766169 256

NODE_4437_length_255_cov_998.415000 255

NODE_4438_length_255_cov_2.025000 255

NODE_4439_length_255_cov_1.800000 255

NODE_4440_length_255_cov_1.800000 255

NODE_4441_length_255_cov_1.750000 255

NODE_4442_length_255_cov_1.575000 255

NODE_4443_length_255_cov_1.570000 255

NODE_4444_length_255_cov_1.565000 255

NODE_4445_length_255_cov_1.350000 255

NODE_4446_length_255_cov_1.235000 255

NODE_4447_length_255_cov_1.160000 255

NODE_4448_length_255_cov_1.125000 255

NODE_4449_length_255_cov_1.125000 255

NODE_4450_length_255_cov_1.100000 255

NODE_4451_length_255_cov_0.960000 255

NODE_4452_length_255_cov_0.900000 255

NODE_4453_length_255_cov_0.900000 255

NODE_4454_length_255_cov_0.900000 255

NODE_4455_length_255_cov_0.830000 255

NODE_4456_length_254_cov_2.713568 254

NODE_4457_length_254_cov_2.688442 254

NODE_4458_length_254_cov_2.587940 254

NODE_4459_length_254_cov_2.105528 254

NODE_4460_length_254_cov_2.035176 254

NODE_4461_length_254_cov_1.944724 254

NODE_4462_length_254_cov_1.859296 254

NODE_4463_length_254_cov_1.582915 254

NODE_4464_length_254_cov_1.356784 254

NODE_4465_length_254_cov_1.356784 254

NODE_4466_length_254_cov_1.356784 254

NODE_4467_length_254_cov_1.356784 254

NODE_4468_length_254_cov_1.130653 254

NODE_4469_length_254_cov_1.130653 254

NODE_4470_length_254_cov_1.130653 254

NODE_4471_length_254_cov_1.130653 254

NODE_4472_length_254_cov_1.130653 254

NODE_4473_length_254_cov_0.904523 254

NODE_4474_length_254_cov_0.904523 254

NODE_4475_length_254_cov_0.904523 254

NODE_4476_length_254_cov_0.904523 254

NODE_4477_length_254_cov_0.904523 254

NODE_4478_length_254_cov_0.904523 254

NODE_4479_length_254_cov_0.904523 254

NODE_4480_length_254_cov_0.904523 254

NODE_4481_length_254_cov_0.829146 254

NODE_4482_length_254_cov_0.678392 254

NODE_4483_length_253_cov_2.207071 253

NODE_4484_length_253_cov_2.045455 253

NODE_4485_length_253_cov_1.590909 253

NODE_4486_length_253_cov_1.550505 253

NODE_4487_length_253_cov_1.136364 253

NODE_4488_length_253_cov_0.909091 253

NODE_4489_length_253_cov_0.909091 253

NODE_4490_length_253_cov_0.904040 253

NODE_4491_length_253_cov_0.893939 253

NODE_4492_length_253_cov_0.883838 253

NODE_4493_length_253_cov_0.838384 253

NODE_4494_length_253_cov_0.681818 253

NODE_4495_length_252_cov_4086.736041 252

NODE_4496_length_252_cov_2.512690 252

NODE_4497_length_252_cov_1.827411 252

NODE_4498_length_252_cov_1.827411 252

NODE_4499_length_252_cov_1.756345 252

NODE_4500_length_252_cov_1.598985 252

NODE_4501_length_252_cov_1.598985 252

NODE_4502_length_252_cov_1.598985 252

NODE_4503_length_252_cov_1.522843 252

NODE_4504_length_252_cov_1.370558 252

NODE_4505_length_252_cov_1.142132 252

NODE_4506_length_252_cov_1.142132 252

NODE_4507_length_252_cov_1.142132 252

NODE_4508_length_252_cov_1.142132 252

NODE_4509_length_252_cov_1.126904 252

NODE_4510_length_252_cov_1.040609 252

NODE_4511_length_252_cov_0.913706 252

NODE_4512_length_252_cov_0.913706 252

NODE_4513_length_252_cov_0.913706 252

NODE_4514_length_252_cov_0.913706 252

NODE_4515_length_252_cov_0.817259 252

NODE_4516_length_252_cov_0.685279 252

NODE_4517_length_251_cov_1.836735 251

NODE_4518_length_251_cov_1.520408 251

NODE_4519_length_251_cov_1.438776 251

NODE_4520_length_251_cov_1.377551 251

NODE_4521_length_251_cov_1.147959 251

NODE_4522_length_251_cov_1.147959 251

NODE_4523_length_251_cov_1.147959 251

NODE_4524_length_251_cov_1.086735 251

NODE_4525_length_251_cov_0.918367 251

NODE_4526_length_251_cov_0.806122 251

NODE_4527_length_251_cov_0.750000 251

NODE_4528_length_251_cov_0.688776 251

NODE_4529_length_251_cov_0.688776 251

NODE_4530_length_250_cov_1.615385 250

NODE_4531_length_250_cov_1.615385 250

NODE_4532_length_250_cov_1.615385 250

NODE_4533_length_250_cov_1.507692 250

NODE_4534_length_250_cov_1.384615 250

NODE_4535_length_250_cov_1.384615 250

NODE_4536_length_250_cov_1.384615 250

NODE_4537_length_250_cov_1.384615 250

NODE_4538_length_250_cov_1.343590 250

NODE_4539_length_250_cov_1.312821 250

NODE_4540_length_250_cov_1.174359 250

NODE_4541_length_250_cov_1.153846 250

NODE_4542_length_250_cov_1.153846 250

NODE_4543_length_250_cov_1.153846 250

NODE_4544_length_250_cov_1.020513 250

NODE_4545_length_250_cov_0.933333 250

NODE_4546_length_250_cov_0.923077 250

NODE_4547_length_250_cov_0.923077 250

NODE_4548_length_250_cov_0.923077 250

NODE_4549_length_250_cov_0.825641 250

NODE_4550_length_250_cov_0.692308 250

NODE_4551_length_250_cov_0.574359 250

NODE_4552_length_249_cov_2.087629 249

NODE_4553_length_249_cov_1.855670 249

NODE_4554_length_249_cov_1.623711 249

NODE_4555_length_249_cov_1.623711 249

NODE_4556_length_249_cov_1.623711 249

NODE_4557_length_249_cov_1.391753 249

NODE_4558_length_249_cov_1.159794 249

NODE_4559_length_249_cov_1.159794 249

NODE_4560_length_249_cov_1.159794 249

NODE_4561_length_249_cov_1.159794 249

NODE_4562_length_249_cov_1.159794 249

NODE_4563_length_249_cov_1.159794 249

NODE_4564_length_249_cov_1.159794 249

NODE_4565_length_249_cov_1.159794 249

NODE_4566_length_249_cov_1.159794 249

NODE_4567_length_249_cov_1.154639 249

NODE_4568_length_249_cov_1.154639 249

NODE_4569_length_249_cov_0.974227 249

NODE_4570_length_249_cov_0.927835 249

NODE_4571_length_249_cov_0.922680 249

NODE_4572_length_249_cov_0.917526 249

NODE_4573_length_249_cov_0.891753 249

NODE_4574_length_249_cov_0.824742 249

NODE_4575_length_249_cov_0.747423 249

NODE_4576_length_249_cov_0.695876 249

NODE_4577_length_249_cov_0.695876 249

NODE_4578_length_249_cov_0.572165 249

NODE_4579_length_248_cov_3.088083 248

NODE_4580_length_248_cov_2.103627 248

NODE_4581_length_248_cov_2.098446 248

NODE_4582_length_248_cov_1.865285 248

NODE_4583_length_248_cov_1.585492 248

NODE_4584_length_248_cov_1.398964 248

NODE_4585_length_248_cov_1.398964 248

NODE_4586_length_248_cov_1.398964 248

NODE_4587_length_248_cov_1.383420 248

NODE_4588_length_248_cov_1.336788 248

NODE_4589_length_248_cov_1.336788 248

NODE_4590_length_248_cov_1.165803 248

NODE_4591_length_248_cov_1.165803 248

NODE_4592_length_248_cov_1.165803 248

NODE_4593_length_248_cov_1.150259 248

NODE_4594_length_248_cov_1.150259 248

NODE_4595_length_248_cov_1.072539 248

NODE_4596_length_248_cov_1.067358 248

NODE_4597_length_248_cov_1.015544 248

NODE_4598_length_248_cov_0.948187 248

NODE_4599_length_248_cov_0.932642 248

NODE_4600_length_248_cov_0.932642 248

NODE_4601_length_248_cov_0.906736 248

NODE_4602_length_248_cov_0.834197 248

NODE_4603_length_248_cov_0.699482 248

NODE_4604_length_248_cov_0.699482 248

NODE_4605_length_247_cov_2.343750 247

NODE_4606_length_247_cov_2.005208 247

NODE_4607_length_247_cov_1.901042 247

NODE_4608_length_247_cov_1.822917 247

NODE_4609_length_247_cov_1.781250 247

NODE_4610_length_247_cov_1.406250 247

NODE_4611_length_247_cov_1.406250 247

NODE_4612_length_247_cov_1.406250 247

NODE_4613_length_247_cov_1.401042 247

NODE_4614_length_247_cov_1.338542 247

NODE_4615_length_247_cov_1.171875 247

NODE_4616_length_247_cov_1.171875 247

NODE_4617_length_247_cov_1.171875 247

NODE_4618_length_247_cov_1.171875 247

NODE_4619_length_247_cov_1.062500 247

NODE_4620_length_247_cov_0.937500 247

NODE_4621_length_247_cov_0.937500 247

NODE_4622_length_247_cov_0.937500 247

NODE_4623_length_247_cov_0.937500 247

NODE_4624_length_247_cov_0.937500 247

NODE_4625_length_247_cov_0.833333 247

NODE_4626_length_247_cov_0.703125 247

NODE_4627_length_247_cov_0.671875 247

NODE_4628_length_246_cov_85.068063 246

NODE_4629_length_246_cov_1.884817 246

NODE_4630_length_246_cov_1.413613 246

NODE_4631_length_246_cov_1.178010 246

NODE_4632_length_246_cov_1.178010 246

NODE_4633_length_246_cov_1.178010 246

NODE_4634_length_246_cov_1.178010 246

NODE_4635_length_246_cov_1.178010 246

NODE_4636_length_246_cov_1.167539 246

NODE_4637_length_246_cov_1.073298 246

NODE_4638_length_246_cov_1.047120 246

NODE_4639_length_246_cov_0.942408 246

NODE_4640_length_246_cov_0.942408 246

NODE_4641_length_246_cov_0.942408 246

NODE_4642_length_246_cov_0.942408 246

NODE_4643_length_246_cov_0.942408 246

NODE_4644_length_246_cov_0.942408 246

NODE_4645_length_246_cov_0.942408 246

NODE_4646_length_246_cov_0.931937 246

NODE_4647_length_246_cov_0.921466 246

NODE_4648_length_245_cov_324.021053 245

NODE_4649_length_245_cov_7.736842 245

NODE_4650_length_245_cov_2.368421 245

NODE_4651_length_245_cov_1.831579 245

NODE_4652_length_245_cov_1.573684 245

NODE_4653_length_245_cov_1.421053 245

NODE_4654_length_245_cov_1.205263 245

NODE_4655_length_245_cov_1.184211 245

NODE_4656_length_245_cov_1.184211 245

NODE_4657_length_245_cov_0.947368 245

NODE_4658_length_245_cov_0.947368 245

NODE_4659_length_245_cov_0.947368 245

NODE_4660_length_245_cov_0.757895 245

NODE_4661_length_245_cov_0.710526 245

NODE_4662_length_245_cov_0.710526 245

NODE_4663_length_245_cov_0.710526 245

NODE_4664_length_245_cov_0.710526 245

NODE_4665_length_244_cov_2742.216931 244

NODE_4666_length_244_cov_2.142857 244

NODE_4667_length_244_cov_1.904762 244

NODE_4668_length_244_cov_1.666667 244

NODE_4669_length_244_cov_1.608466 244

NODE_4670_length_244_cov_1.497354 244

NODE_4671_length_244_cov_1.428571 244

NODE_4672_length_244_cov_1.428571 244

NODE_4673_length_244_cov_1.190476 244

NODE_4674_length_244_cov_1.190476 244

NODE_4675_length_244_cov_1.126984 244

NODE_4676_length_244_cov_1.005291 244

NODE_4677_length_244_cov_0.952381 244

NODE_4678_length_244_cov_0.952381 244

NODE_4679_length_244_cov_0.952381 244

NODE_4680_length_244_cov_0.952381 244

NODE_4681_length_244_cov_0.952381 244

NODE_4682_length_244_cov_0.952381 244

NODE_4683_length_244_cov_0.952381 244

NODE_4684_length_244_cov_0.952381 244

NODE_4685_length_244_cov_0.952381 244

NODE_4686_length_244_cov_0.952381 244

NODE_4687_length_244_cov_0.714286 244

NODE_4688_length_244_cov_0.714286 244

NODE_4689_length_244_cov_0.714286 244

NODE_4690_length_244_cov_0.714286 244

NODE_4691_length_243_cov_10629.324468 243

NODE_4692_length_243_cov_102.494681 243

NODE_4693_length_243_cov_2.154255 243

NODE_4694_length_243_cov_1.914894 243

NODE_4695_length_243_cov_1.914894 243

NODE_4696_length_243_cov_1.675532 243

NODE_4697_length_243_cov_1.436170 243

NODE_4698_length_243_cov_1.436170 243

NODE_4699_length_243_cov_1.398936 243

NODE_4700_length_243_cov_1.196809 243

NODE_4701_length_243_cov_1.196809 243

NODE_4702_length_243_cov_1.196809 243

NODE_4703_length_243_cov_1.196809 243

NODE_4704_length_243_cov_1.196809 243

NODE_4705_length_243_cov_1.196809 243

NODE_4706_length_243_cov_1.196809 243

NODE_4707_length_243_cov_0.957447 243

NODE_4708_length_243_cov_0.957447 243

NODE_4709_length_243_cov_0.957447 243

NODE_4710_length_243_cov_0.957447 243

NODE_4711_length_243_cov_0.882979 243

NODE_4712_length_243_cov_0.856383 243

NODE_4713_length_243_cov_0.718085 243

NODE_4714_length_243_cov_0.718085 243

NODE_4715_length_243_cov_0.718085 243

NODE_4716_length_243_cov_0.718085 243

NODE_4717_length_243_cov_0.702128 243

NODE_4718_length_242_cov_2.165775 242

NODE_4719_length_242_cov_2.165775 242

NODE_4720_length_242_cov_1.684492 242

NODE_4721_length_242_cov_1.657754 242

NODE_4722_length_242_cov_1.475936 242

NODE_4723_length_242_cov_1.203209 242

NODE_4724_length_242_cov_0.962567 242

NODE_4725_length_242_cov_0.962567 242

NODE_4726_length_242_cov_0.962567 242

NODE_4727_length_242_cov_0.962567 242

NODE_4728_length_242_cov_0.962567 242

NODE_4729_length_242_cov_0.962567 242

NODE_4730_length_242_cov_0.946524 242

NODE_4731_length_242_cov_0.850267 242

NODE_4732_length_242_cov_0.721925 242

NODE_4733_length_242_cov_0.689840 242

NODE_4734_length_241_cov_1889.182796 241

NODE_4735_length_241_cov_49.548387 241

NODE_4736_length_241_cov_2.177419 241

NODE_4737_length_241_cov_1.693548 241

NODE_4738_length_241_cov_1.543011 241

NODE_4739_length_241_cov_1.209677 241

NODE_4740_length_241_cov_1.204301 241

NODE_4741_length_241_cov_0.967742 241

NODE_4742_length_241_cov_0.967742 241

NODE_4743_length_241_cov_0.967742 241

NODE_4744_length_241_cov_0.940860 241

NODE_4745_length_241_cov_0.725806 241

NODE_4746_length_241_cov_0.682796 241

NODE_4747_length_240_cov_64.189189 240

NODE_4748_length_240_cov_1.702703 240

NODE_4749_length_240_cov_1.459459 240

NODE_4750_length_240_cov_1.275676 240

NODE_4751_length_240_cov_1.216216 240

NODE_4752_length_240_cov_1.216216 240

NODE_4753_length_240_cov_1.216216 240

NODE_4754_length_240_cov_1.216216 240

NODE_4755_length_240_cov_1.113514 240

NODE_4756_length_240_cov_0.972973 240

NODE_4757_length_240_cov_0.972973 240

NODE_4758_length_240_cov_0.972973 240

NODE_4759_length_240_cov_0.972973 240

NODE_4760_length_240_cov_0.972973 240

NODE_4761_length_240_cov_0.972973 240

NODE_4762_length_240_cov_0.972973 240

NODE_4763_length_240_cov_0.972973 240

NODE_4764_length_240_cov_0.951351 240

NODE_4765_length_240_cov_0.875676 240

NODE_4766_length_240_cov_0.794595 240

NODE_4767_length_240_cov_0.729730 240

NODE_4768_length_240_cov_0.729730 240

NODE_4769_length_240_cov_0.729730 240

NODE_4770_length_240_cov_0.729730 240

NODE_4771_length_240_cov_0.686486 240

NODE_4772_length_240_cov_0.686486 240

NODE_4773_length_239_cov_6736.146739 239

NODE_4774_length_239_cov_23.798913 239

NODE_4775_length_239_cov_21.222826 239

NODE_4776_length_239_cov_2.722826 239

NODE_4777_length_239_cov_2.201087 239

NODE_4778_length_239_cov_1.711957 239

NODE_4779_length_239_cov_1.711957 239

NODE_4780_length_239_cov_1.635870 239

NODE_4781_length_239_cov_1.625000 239

NODE_4782_length_239_cov_1.538043 239

NODE_4783_length_239_cov_1.467391 239

NODE_4784_length_239_cov_1.467391 239

NODE_4785_length_239_cov_1.222826 239

NODE_4786_length_239_cov_1.222826 239

NODE_4787_length_239_cov_1.222826 239

NODE_4788_length_239_cov_0.978261 239

NODE_4789_length_239_cov_0.978261 239

NODE_4790_length_239_cov_0.978261 239

NODE_4791_length_239_cov_0.978261 239

NODE_4792_length_239_cov_0.978261 239

NODE_4793_length_239_cov_0.978261 239

NODE_4794_length_239_cov_0.978261 239

NODE_4795_length_239_cov_0.978261 239

NODE_4796_length_239_cov_0.951087 239

NODE_4797_length_239_cov_0.847826 239

NODE_4798_length_239_cov_0.733696 239

NODE_4799_length_239_cov_0.717391 239

NODE_4800_length_238_cov_71.918033 238

NODE_4801_length_238_cov_13.054645 238

NODE_4802_length_238_cov_4.606557 238

NODE_4803_length_238_cov_2.879781 238

NODE_4804_length_238_cov_1.967213 238

NODE_4805_length_238_cov_1.721311 238

NODE_4806_length_238_cov_1.721311 238

NODE_4807_length_238_cov_1.715847 238

NODE_4808_length_238_cov_1.475410 238

NODE_4809_length_238_cov_1.355191 238

NODE_4810_length_238_cov_1.229508 238

NODE_4811_length_238_cov_1.229508 238

NODE_4812_length_238_cov_1.229508 238

NODE_4813_length_238_cov_1.229508 238

NODE_4814_length_238_cov_0.983607 238

NODE_4815_length_238_cov_0.983607 238

NODE_4816_length_238_cov_0.983607 238

NODE_4817_length_238_cov_0.983607 238

NODE_4818_length_238_cov_0.923497 238

NODE_4819_length_238_cov_0.901639 238

NODE_4820_length_238_cov_0.808743 238

NODE_4821_length_238_cov_0.737705 238

NODE_4822_length_238_cov_0.737705 238

NODE_4823_length_238_cov_0.737705 238

NODE_4824_length_238_cov_0.737705 238

NODE_4825_length_238_cov_0.710383 238

NODE_4826_length_238_cov_0.699454 238

NODE_4827_length_237_cov_2.719780 237

NODE_4828_length_237_cov_1.978022 237

NODE_4829_length_237_cov_1.730769 237

NODE_4830_length_237_cov_1.313187 237

NODE_4831_length_237_cov_1.236264 237

NODE_4832_length_237_cov_1.236264 237

NODE_4833_length_237_cov_1.236264 237

NODE_4834_length_237_cov_1.236264 237

NODE_4835_length_237_cov_1.236264 237

NODE_4836_length_237_cov_1.236264 237

NODE_4837_length_237_cov_1.181319 237

NODE_4838_length_237_cov_1.060440 237

NODE_4839_length_237_cov_0.989011 237

NODE_4840_length_237_cov_0.989011 237

NODE_4841_length_237_cov_0.989011 237

NODE_4842_length_237_cov_0.989011 237

NODE_4843_length_237_cov_0.989011 237

NODE_4844_length_237_cov_0.989011 237

NODE_4845_length_237_cov_0.967033 237

NODE_4846_length_237_cov_0.950549 237

NODE_4847_length_237_cov_0.928571 237

NODE_4848_length_237_cov_0.785714 237

NODE_4849_length_237_cov_0.741758 237

NODE_4850_length_237_cov_0.741758 237

NODE_4851_length_237_cov_0.741758 237

NODE_4852_length_237_cov_0.741758 237

NODE_4853_length_237_cov_0.741758 237

NODE_4854_length_237_cov_0.741758 237

NODE_4855_length_236_cov_1.745856 236

NODE_4856_length_236_cov_1.679558 236

NODE_4857_length_236_cov_1.491713 236

NODE_4858_length_236_cov_1.491713 236

NODE_4859_length_236_cov_1.243094 236

NODE_4860_length_236_cov_1.243094 236

NODE_4861_length_236_cov_1.243094 236

NODE_4862_length_236_cov_1.243094 236

NODE_4863_length_236_cov_1.243094 236

NODE_4864_length_236_cov_1.243094 236

NODE_4865_length_236_cov_1.243094 236

NODE_4866_length_236_cov_1.204420 236

NODE_4867_length_236_cov_1.110497 236

NODE_4868_length_236_cov_1.060773 236

NODE_4869_length_236_cov_0.994475 236

NODE_4870_length_236_cov_0.994475 236

NODE_4871_length_236_cov_0.994475 236

NODE_4872_length_236_cov_0.994475 236

NODE_4873_length_236_cov_0.994475 236

NODE_4874_length_236_cov_0.994475 236

NODE_4875_length_236_cov_0.994475 236

NODE_4876_length_236_cov_0.994475 236

NODE_4877_length_236_cov_0.900552 236

NODE_4878_length_236_cov_0.745856 236

NODE_4879_length_236_cov_0.745856 236

NODE_4880_length_236_cov_0.745856 236

NODE_4881_length_236_cov_0.745856 236

NODE_4882_length_236_cov_0.745856 236

NODE_4883_length_236_cov_0.745856 236

NODE_4884_length_236_cov_0.745856 236

NODE_4885_length_236_cov_0.745856 236

NODE_4886_length_236_cov_0.723757 236

NODE_4887_length_235_cov_32.605556 235

NODE_4888_length_235_cov_2.250000 235

NODE_4889_length_235_cov_1.655556 235

NODE_4890_length_235_cov_1.500000 235

NODE_4891_length_235_cov_1.500000 235

NODE_4892_length_235_cov_1.500000 235

NODE_4893_length_235_cov_1.494444 235

NODE_4894_length_235_cov_1.466667 235

NODE_4895_length_235_cov_1.327778 235

NODE_4896_length_235_cov_1.316667 235

NODE_4897_length_235_cov_1.250000 235

NODE_4898_length_235_cov_1.250000 235

NODE_4899_length_235_cov_1.250000 235

NODE_4900_length_235_cov_1.250000 235

NODE_4901_length_235_cov_1.222222 235

NODE_4902_length_235_cov_1.183333 235

NODE_4903_length_235_cov_1.005556 235

NODE_4904_length_235_cov_1.000000 235

NODE_4905_length_235_cov_1.000000 235

NODE_4906_length_235_cov_1.000000 235

NODE_4907_length_235_cov_1.000000 235

NODE_4908_length_235_cov_1.000000 235

NODE_4909_length_235_cov_1.000000 235

NODE_4910_length_235_cov_0.966667 235

NODE_4911_length_235_cov_0.966667 235

NODE_4912_length_235_cov_0.838889 235

NODE_4913_length_235_cov_0.805556 235

NODE_4914_length_235_cov_0.750000 235

NODE_4915_length_235_cov_0.750000 235

NODE_4916_length_235_cov_0.750000 235

NODE_4917_length_235_cov_0.750000 235

NODE_4918_length_235_cov_0.750000 235

NODE_4919_length_235_cov_0.738889 235

NODE_4920_length_234_cov_30.312849 234

NODE_4921_length_234_cov_2.262570 234

NODE_4922_length_234_cov_2.011173 234

NODE_4923_length_234_cov_1.759777 234

NODE_4924_length_234_cov_1.508380 234

NODE_4925_length_234_cov_1.256983 234

NODE_4926_length_234_cov_1.256983 234

NODE_4927_length_234_cov_1.251397 234

NODE_4928_length_234_cov_1.005587 234

NODE_4929_length_234_cov_1.005587 234

NODE_4930_length_234_cov_1.005587 234

NODE_4931_length_234_cov_1.005587 234

NODE_4932_length_234_cov_1.005587 234

NODE_4933_length_234_cov_1.005587 234

NODE_4934_length_234_cov_1.005587 234

NODE_4935_length_234_cov_1.000000 234

NODE_4936_length_234_cov_0.944134 234

NODE_4937_length_234_cov_0.860335 234

NODE_4938_length_234_cov_0.754190 234

NODE_4939_length_234_cov_0.754190 234

NODE_4940_length_234_cov_0.754190 234

NODE_4941_length_234_cov_0.726257 234

NODE_4942_length_233_cov_2.275281 233

NODE_4943_length_233_cov_2.022472 233

NODE_4944_length_233_cov_1.769663 233

NODE_4945_length_233_cov_1.769663 233

NODE_4946_length_233_cov_1.769663 233

NODE_4947_length_233_cov_1.707865 233

NODE_4948_length_233_cov_1.516854 233

NODE_4949_length_233_cov_1.516854 233

NODE_4950_length_233_cov_1.516854 233

NODE_4951_length_233_cov_1.516854 233

NODE_4952_length_233_cov_1.516854 233

NODE_4953_length_233_cov_1.264045 233

NODE_4954_length_233_cov_1.264045 233

NODE_4955_length_233_cov_1.264045 233

NODE_4956_length_233_cov_1.157303 233

NODE_4957_length_233_cov_1.117978 233

NODE_4958_length_233_cov_1.084270 233

NODE_4959_length_233_cov_1.011236 233

NODE_4960_length_233_cov_1.011236 233

NODE_4961_length_233_cov_1.011236 233

NODE_4962_length_233_cov_1.011236 233

NODE_4963_length_233_cov_0.949438 233

NODE_4964_length_233_cov_0.910112 233

NODE_4965_length_233_cov_0.758427 233

NODE_4966_length_233_cov_0.758427 233

NODE_4967_length_233_cov_0.758427 233

NODE_4968_length_233_cov_0.533708 233

NODE_4969_length_233_cov_0.494382 233

NODE_4970_length_232_cov_7.016949 232

NODE_4971_length_232_cov_2.033898 232

NODE_4972_length_232_cov_1.779661 232

NODE_4973_length_232_cov_1.779661 232

NODE_4974_length_232_cov_1.514124 232

NODE_4975_length_232_cov_1.271186 232

NODE_4976_length_232_cov_1.271186 232

NODE_4977_length_232_cov_1.271186 232

NODE_4978_length_232_cov_1.271186 232

NODE_4979_length_232_cov_1.271186 232

NODE_4980_length_232_cov_1.271186 232

NODE_4981_length_232_cov_1.016949 232

NODE_4982_length_232_cov_1.016949 232

NODE_4983_length_232_cov_1.016949 232

NODE_4984_length_232_cov_1.016949 232

NODE_4985_length_232_cov_1.016949 232

NODE_4986_length_232_cov_1.011299 232

NODE_4987_length_232_cov_0.774011 232

NODE_4988_length_232_cov_0.762712 232

NODE_4989_length_232_cov_0.762712 232

NODE_4990_length_232_cov_0.762712 232

NODE_4991_length_232_cov_0.762712 232

NODE_4992_length_232_cov_0.762712 232

NODE_4993_length_232_cov_0.666667 232

NODE_4994_length_231_cov_12.875000 231

NODE_4995_length_231_cov_8.846591 231

NODE_4996_length_231_cov_2.301136 231

NODE_4997_length_231_cov_2.045455 231

NODE_4998_length_231_cov_1.789773 231

NODE_4999_length_231_cov_1.789773 231

NODE_5000_length_231_cov_1.789773 231

NODE_5001_length_231_cov_1.789773 231

NODE_5002_length_231_cov_1.778409 231

NODE_5003_length_231_cov_1.761364 231

NODE_5004_length_231_cov_1.619318 231

NODE_5005_length_231_cov_1.534091 231

NODE_5006_length_231_cov_1.534091 231

NODE_5007_length_231_cov_1.534091 231

NODE_5008_length_231_cov_1.528409 231

NODE_5009_length_231_cov_1.318182 231

NODE_5010_length_231_cov_1.278409 231

NODE_5011_length_231_cov_1.278409 231

NODE_5012_length_231_cov_1.278409 231

NODE_5013_length_231_cov_1.278409 231

NODE_5014_length_231_cov_1.278409 231

NODE_5015_length_231_cov_1.227273 231

NODE_5016_length_231_cov_1.204545 231

NODE_5017_length_231_cov_1.022727 231

NODE_5018_length_231_cov_1.022727 231

NODE_5019_length_231_cov_1.022727 231

NODE_5020_length_231_cov_1.022727 231

NODE_5021_length_231_cov_1.022727 231

NODE_5022_length_231_cov_1.022727 231

NODE_5023_length_231_cov_1.005682 231

NODE_5024_length_231_cov_0.977273 231

NODE_5025_length_231_cov_0.767045 231

NODE_5026_length_231_cov_0.755682 231

NODE_5027_length_230_cov_2.571429 230

NODE_5028_length_230_cov_1.908571 230

NODE_5029_length_230_cov_1.542857 230

NODE_5030_length_230_cov_1.542857 230

NODE_5031_length_230_cov_1.285714 230

NODE_5032_length_230_cov_1.285714 230

NODE_5033_length_230_cov_1.285714 230

NODE_5034_length_230_cov_1.285714 230

NODE_5035_length_230_cov_1.285714 230

NODE_5036_length_230_cov_1.285714 230

NODE_5037_length_230_cov_1.285714 230

NODE_5038_length_230_cov_1.285714 230

NODE_5039_length_230_cov_1.285714 230

NODE_5040_length_230_cov_1.028571 230

NODE_5041_length_230_cov_1.028571 230

NODE_5042_length_230_cov_1.028571 230

NODE_5043_length_230_cov_1.028571 230

NODE_5044_length_230_cov_1.028571 230

NODE_5045_length_230_cov_0.988571 230

NODE_5046_length_230_cov_0.937143 230

NODE_5047_length_230_cov_0.937143 230

NODE_5048_length_230_cov_0.880000 230

NODE_5049_length_230_cov_0.771429 230

NODE_5050_length_230_cov_0.771429 230

NODE_5051_length_230_cov_0.771429 230

NODE_5052_length_230_cov_0.771429 230

NODE_5053_length_230_cov_0.771429 230

NODE_5054_length_230_cov_0.771429 230

NODE_5055_length_230_cov_0.668571 230

NODE_5056_length_229_cov_1.810345 229

NODE_5057_length_229_cov_1.551724 229

NODE_5058_length_229_cov_1.551724 229

NODE_5059_length_229_cov_1.551724 229

NODE_5060_length_229_cov_1.551724 229

NODE_5061_length_229_cov_1.293103 229

NODE_5062_length_229_cov_1.293103 229

NODE_5063_length_229_cov_1.293103 229

NODE_5064_length_229_cov_1.293103 229

NODE_5065_length_229_cov_1.293103 229

NODE_5066_length_229_cov_1.293103 229

NODE_5067_length_229_cov_1.218391 229

NODE_5068_length_229_cov_1.149425 229

NODE_5069_length_229_cov_1.034483 229

NODE_5070_length_229_cov_1.034483 229

NODE_5071_length_229_cov_1.034483 229

NODE_5072_length_229_cov_1.034483 229

NODE_5073_length_229_cov_1.034483 229

NODE_5074_length_229_cov_1.017241 229

NODE_5075_length_229_cov_0.775862 229

NODE_5076_length_229_cov_0.775862 229

NODE_5077_length_229_cov_0.775862 229

NODE_5078_length_229_cov_0.775862 229

NODE_5079_length_229_cov_0.775862 229

NODE_5080_length_229_cov_0.775862 229

NODE_5081_length_229_cov_0.775862 229

NODE_5082_length_229_cov_0.770115 229

NODE_5083_length_229_cov_0.741379 229

NODE_5084_length_229_cov_0.741379 229

NODE_5085_length_229_cov_0.689655 229

NODE_5086_length_228_cov_3160.867052 228

NODE_5087_length_228_cov_4.612717 228

NODE_5088_length_228_cov_2.086705 228

NODE_5089_length_228_cov_2.080925 228

NODE_5090_length_228_cov_1.560694 228

NODE_5091_length_228_cov_1.537572 228

NODE_5092_length_228_cov_1.508671 228

NODE_5093_length_228_cov_1.300578 228

NODE_5094_length_228_cov_1.300578 228

NODE_5095_length_228_cov_1.300578 228

NODE_5096_length_228_cov_1.300578 228

NODE_5097_length_228_cov_1.300578 228

NODE_5098_length_228_cov_1.080925 228

NODE_5099_length_228_cov_1.040462 228

NODE_5100_length_228_cov_1.040462 228

NODE_5101_length_228_cov_1.040462 228

NODE_5102_length_228_cov_1.040462 228

NODE_5103_length_228_cov_0.988439 228

NODE_5104_length_228_cov_0.988439 228

NODE_5105_length_228_cov_0.965318 228

NODE_5106_length_228_cov_0.959538 228

NODE_5107_length_228_cov_0.913295 228

NODE_5108_length_228_cov_0.780347 228

NODE_5109_length_228_cov_0.780347 228

NODE_5110_length_228_cov_0.780347 228

NODE_5111_length_228_cov_0.774566 228

NODE_5112_length_228_cov_0.757225 228

NODE_5113_length_227_cov_31.325581 227

NODE_5114_length_227_cov_2.877907 227

NODE_5115_length_227_cov_2.296512 227

NODE_5116_length_227_cov_1.831395 227

NODE_5117_length_227_cov_1.604651 227

NODE_5118_length_227_cov_1.569767 227

NODE_5119_length_227_cov_1.569767 227

NODE_5120_length_227_cov_1.563953 227

NODE_5121_length_227_cov_1.308140 227

NODE_5122_length_227_cov_1.308140 227

NODE_5123_length_227_cov_1.308140 227

NODE_5124_length_227_cov_1.308140 227

NODE_5125_length_227_cov_1.226744 227

NODE_5126_length_227_cov_1.209302 227

NODE_5127_length_227_cov_1.046512 227

NODE_5128_length_227_cov_1.046512 227

NODE_5129_length_227_cov_1.046512 227

NODE_5130_length_227_cov_1.046512 227

NODE_5131_length_227_cov_0.941860 227

NODE_5132_length_227_cov_0.912791 227

NODE_5133_length_227_cov_0.784884 227

NODE_5134_length_227_cov_0.784884 227

NODE_5135_length_227_cov_0.784884 227

NODE_5136_length_227_cov_0.784884 227

NODE_5137_length_227_cov_0.784884 227

NODE_5138_length_227_cov_0.784884 227

NODE_5139_length_227_cov_0.784884 227

NODE_5140_length_227_cov_0.784884 227

NODE_5141_length_227_cov_0.779070 227

NODE_5142_length_226_cov_33.339181 226

NODE_5143_length_226_cov_1.830409 226

NODE_5144_length_226_cov_1.578947 226

NODE_5145_length_226_cov_1.555556 226

NODE_5146_length_226_cov_1.538012 226

NODE_5147_length_226_cov_1.315789 226

NODE_5148_length_226_cov_1.315789 226

NODE_5149_length_226_cov_1.315789 226

NODE_5150_length_226_cov_1.315789 226

NODE_5151_length_226_cov_1.292398 226

NODE_5152_length_226_cov_1.280702 226

NODE_5153_length_226_cov_1.233918 226

NODE_5154_length_226_cov_1.052632 226

NODE_5155_length_226_cov_1.052632 226

NODE_5156_length_226_cov_1.052632 226

NODE_5157_length_226_cov_1.052632 226

NODE_5158_length_226_cov_1.052632 226

NODE_5159_length_226_cov_1.029240 226

NODE_5160_length_226_cov_1.011696 226

NODE_5161_length_226_cov_0.976608 226

NODE_5162_length_226_cov_0.959064 226

NODE_5163_length_226_cov_0.923977 226

NODE_5164_length_226_cov_0.789474 226

NODE_5165_length_226_cov_0.789474 226

NODE_5166_length_226_cov_0.789474 226

NODE_5167_length_226_cov_0.789474 226

NODE_5168_length_226_cov_0.789474 226

NODE_5169_length_226_cov_0.789474 226

NODE_5170_length_226_cov_0.783626 226

NODE_5171_length_226_cov_0.754386 226

NODE_5172_length_225_cov_2.382353 225

NODE_5173_length_225_cov_1.852941 225

NODE_5174_length_225_cov_1.588235 225

NODE_5175_length_225_cov_1.588235 225

NODE_5176_length_225_cov_1.588235 225

NODE_5177_length_225_cov_1.323529 225

NODE_5178_length_225_cov_1.323529 225

NODE_5179_length_225_cov_1.323529 225

NODE_5180_length_225_cov_1.323529 225

NODE_5181_length_225_cov_1.323529 225

NODE_5182_length_225_cov_1.058824 225

NODE_5183_length_225_cov_1.058824 225

NODE_5184_length_225_cov_1.058824 225

NODE_5185_length_225_cov_1.058824 225

NODE_5186_length_225_cov_1.058824 225

NODE_5187_length_225_cov_1.058824 225

NODE_5188_length_225_cov_1.058824 225

NODE_5189_length_225_cov_1.058824 225

NODE_5190_length_225_cov_1.035294 225

NODE_5191_length_225_cov_0.988235 225

NODE_5192_length_225_cov_0.794118 225

NODE_5193_length_225_cov_0.794118 225

NODE_5194_length_225_cov_0.794118 225

NODE_5195_length_225_cov_0.794118 225

NODE_5196_length_225_cov_0.794118 225

NODE_5197_length_225_cov_0.794118 225

NODE_5198_length_225_cov_0.782353 225

NODE_5199_length_224_cov_31.171598 224

NODE_5200_length_224_cov_2.497041 224

NODE_5201_length_224_cov_2.396450 224

NODE_5202_length_224_cov_2.130178 224

NODE_5203_length_224_cov_2.130178 224

NODE_5204_length_224_cov_1.863905 224

NODE_5205_length_224_cov_1.863905 224

NODE_5206_length_224_cov_1.863905 224

NODE_5207_length_224_cov_1.597633 224

NODE_5208_length_224_cov_1.597633 224

NODE_5209_length_224_cov_1.597633 224

NODE_5210_length_224_cov_1.597633 224

NODE_5211_length_224_cov_1.331361 224

NODE_5212_length_224_cov_1.331361 224

NODE_5213_length_224_cov_1.331361 224

NODE_5214_length_224_cov_1.331361 224

NODE_5215_length_224_cov_1.147929 224

NODE_5216_length_224_cov_1.071006 224

NODE_5217_length_224_cov_1.065089 224

NODE_5218_length_224_cov_1.065089 224

NODE_5219_length_224_cov_1.065089 224

NODE_5220_length_224_cov_1.065089 224

NODE_5221_length_224_cov_1.065089 224

NODE_5222_length_224_cov_1.053254 224

NODE_5223_length_224_cov_1.041420 224

NODE_5224_length_224_cov_0.905325 224

NODE_5225_length_224_cov_0.893491 224

NODE_5226_length_224_cov_0.798817 224

NODE_5227_length_224_cov_0.798817 224

NODE_5228_length_224_cov_0.798817 224

NODE_5229_length_224_cov_0.798817 224

NODE_5230_length_224_cov_0.798817 224

NODE_5231_length_224_cov_0.798817 224

NODE_5232_length_224_cov_0.798817 224

NODE_5233_length_224_cov_0.798817 224

NODE_5234_length_224_cov_0.798817 224

NODE_5235_length_224_cov_0.798817 224

NODE_5236_length_224_cov_0.798817 224

NODE_5237_length_224_cov_0.792899 224

NODE_5238_length_224_cov_0.727811 224

NODE_5239_length_223_cov_490.583333 223

NODE_5240_length_223_cov_36.595238 223

NODE_5241_length_223_cov_2.142857 223

NODE_5242_length_223_cov_1.434524 223

NODE_5243_length_223_cov_1.339286 223

NODE_5244_length_223_cov_1.339286 223

NODE_5245_length_223_cov_1.339286 223

NODE_5246_length_223_cov_1.339286 223

NODE_5247_length_223_cov_1.339286 223

NODE_5248_length_223_cov_1.339286 223

NODE_5249_length_223_cov_1.172619 223

NODE_5250_length_223_cov_1.071429 223

NODE_5251_length_223_cov_1.071429 223

NODE_5252_length_223_cov_1.071429 223

NODE_5253_length_223_cov_1.071429 223

NODE_5254_length_223_cov_1.071429 223

NODE_5255_length_223_cov_1.071429 223

NODE_5256_length_223_cov_1.071429 223

NODE_5257_length_223_cov_1.065476 223

NODE_5258_length_223_cov_0.821429 223

NODE_5259_length_223_cov_0.803571 223

NODE_5260_length_223_cov_0.803571 223

NODE_5261_length_223_cov_0.803571 223

NODE_5262_length_223_cov_0.803571 223

NODE_5263_length_223_cov_0.803571 223

NODE_5264_length_223_cov_0.803571 223

NODE_5265_length_223_cov_0.803571 223

NODE_5266_length_222_cov_17.305389 222

NODE_5267_length_222_cov_8.802395 222

NODE_5268_length_222_cov_2.209581 222

NODE_5269_length_222_cov_1.886228 222

NODE_5270_length_222_cov_1.886228 222

NODE_5271_length_222_cov_1.532934 222

NODE_5272_length_222_cov_1.497006 222

NODE_5273_length_222_cov_1.467066 222

NODE_5274_length_222_cov_1.347305 222

NODE_5275_length_222_cov_1.347305 222

NODE_5276_length_222_cov_1.347305 222

NODE_5277_length_222_cov_1.347305 222

NODE_5278_length_222_cov_1.347305 222

NODE_5279_length_222_cov_1.347305 222

NODE_5280_length_222_cov_1.347305 222

NODE_5281_length_222_cov_1.347305 222

NODE_5282_length_222_cov_1.347305 222

NODE_5283_length_222_cov_1.299401 222

NODE_5284_length_222_cov_1.233533 222

NODE_5285_length_222_cov_1.191617 222

NODE_5286_length_222_cov_1.173653 222

NODE_5287_length_222_cov_1.077844 222

NODE_5288_length_222_cov_1.077844 222

NODE_5289_length_222_cov_1.077844 222

NODE_5290_length_222_cov_1.077844 222

NODE_5291_length_222_cov_1.077844 222

NODE_5292_length_222_cov_1.017964 222

NODE_5293_length_222_cov_0.994012 222

NODE_5294_length_222_cov_0.988024 222

NODE_5295_length_222_cov_0.928144 222

NODE_5296_length_222_cov_0.928144 222

NODE_5297_length_222_cov_0.808383 222

NODE_5298_length_222_cov_0.808383 222

NODE_5299_length_222_cov_0.808383 222

NODE_5300_length_222_cov_0.808383 222

NODE_5301_length_222_cov_0.808383 222

NODE_5302_length_222_cov_0.808383 222

NODE_5303_length_222_cov_0.808383 222

NODE_5304_length_222_cov_0.808383 222

NODE_5305_length_222_cov_0.808383 222

NODE_5306_length_222_cov_0.808383 222

NODE_5307_length_222_cov_0.808383 222

NODE_5308_length_222_cov_0.742515 222

NODE_5309_length_221_cov_14.186747 221

NODE_5310_length_221_cov_2.066265 221

NODE_5311_length_221_cov_1.897590 221

NODE_5312_length_221_cov_1.897590 221

NODE_5313_length_221_cov_1.789157 221

NODE_5314_length_221_cov_1.626506 221

NODE_5315_length_221_cov_1.626506 221

NODE_5316_length_221_cov_1.626506 221

NODE_5317_length_221_cov_1.566265 221

NODE_5318_length_221_cov_1.355422 221

NODE_5319_length_221_cov_1.355422 221

NODE_5320_length_221_cov_1.355422 221

NODE_5321_length_221_cov_1.355422 221

NODE_5322_length_221_cov_1.355422 221

NODE_5323_length_221_cov_1.084337 221

NODE_5324_length_221_cov_1.084337 221

NODE_5325_length_221_cov_1.084337 221

NODE_5326_length_221_cov_1.084337 221

NODE_5327_length_221_cov_1.084337 221

NODE_5328_length_221_cov_1.012048 221

NODE_5329_length_221_cov_0.915663 221

NODE_5330_length_221_cov_0.813253 221

NODE_5331_length_221_cov_0.813253 221

NODE_5332_length_221_cov_0.813253 221

NODE_5333_length_221_cov_0.813253 221

NODE_5334_length_221_cov_0.813253 221

NODE_5335_length_221_cov_0.813253 221

NODE_5336_length_221_cov_0.813253 221

NODE_5337_length_221_cov_0.813253 221

NODE_5338_length_221_cov_0.813253 221

NODE_5339_length_221_cov_0.807229 221

NODE_5340_length_221_cov_0.722892 221

NODE_5341_length_220_cov_2.515152 220

NODE_5342_length_220_cov_2.454545 220

NODE_5343_length_220_cov_2.181818 220

NODE_5344_length_220_cov_1.830303 220

NODE_5345_length_220_cov_1.636364 220

NODE_5346_length_220_cov_1.636364 220

NODE_5347_length_220_cov_1.636364 220

NODE_5348_length_220_cov_1.636364 220

NODE_5349_length_220_cov_1.363636 220

NODE_5350_length_220_cov_1.363636 220

NODE_5351_length_220_cov_1.363636 220

NODE_5352_length_220_cov_1.363636 220

NODE_5353_length_220_cov_1.296970 220

NODE_5354_length_220_cov_1.090909 220

NODE_5355_length_220_cov_1.090909 220

NODE_5356_length_220_cov_1.090909 220

NODE_5357_length_220_cov_1.090909 220

NODE_5358_length_220_cov_1.036364 220

NODE_5359_length_220_cov_1.030303 220

NODE_5360_length_220_cov_0.975758 220

NODE_5361_length_220_cov_0.890909 220

NODE_5362_length_220_cov_0.830303 220

NODE_5363_length_220_cov_0.818182 220

NODE_5364_length_220_cov_0.818182 220

NODE_5365_length_220_cov_0.818182 220

NODE_5366_length_220_cov_0.818182 220

NODE_5367_length_220_cov_0.733333 220

NODE_5368_length_219_cov_75.207317 219

NODE_5369_length_219_cov_1.920732 219

NODE_5370_length_219_cov_1.896341 219

NODE_5371_length_219_cov_1.646341 219

NODE_5372_length_219_cov_1.646341 219

NODE_5373_length_219_cov_1.634146 219

NODE_5374_length_219_cov_1.554878 219

NODE_5375_length_219_cov_1.512195 219

NODE_5376_length_219_cov_1.414634 219

NODE_5377_length_219_cov_1.371951 219

NODE_5378_length_219_cov_1.371951 219

NODE_5379_length_219_cov_1.371951 219

NODE_5380_length_219_cov_1.371951 219

NODE_5381_length_219_cov_1.371951 219

NODE_5382_length_219_cov_1.371951 219

NODE_5383_length_219_cov_1.347561 219

NODE_5384_length_219_cov_1.097561 219

NODE_5385_length_219_cov_1.097561 219

NODE_5386_length_219_cov_1.097561 219

NODE_5387_length_219_cov_1.097561 219

NODE_5388_length_219_cov_1.097561 219

NODE_5389_length_219_cov_1.097561 219

NODE_5390_length_219_cov_1.097561 219

NODE_5391_length_219_cov_1.091463 219

NODE_5392_length_219_cov_1.036585 219

NODE_5393_length_219_cov_0.823171 219

NODE_5394_length_219_cov_0.823171 219

NODE_5395_length_219_cov_0.823171 219

NODE_5396_length_219_cov_0.823171 219

NODE_5397_length_219_cov_0.823171 219

NODE_5398_length_219_cov_0.823171 219

NODE_5399_length_219_cov_0.823171 219

NODE_5400_length_219_cov_0.823171 219

NODE_5401_length_219_cov_0.774390 219

NODE_5402_length_218_cov_23.288344 218

NODE_5403_length_218_cov_2.760736 218

NODE_5404_length_218_cov_1.907975 218

NODE_5405_length_218_cov_1.797546 218

NODE_5406_length_218_cov_1.656442 218

NODE_5407_length_218_cov_1.607362 218

NODE_5408_length_218_cov_1.607362 218

NODE_5409_length_218_cov_1.380368 218

NODE_5410_length_218_cov_1.380368 218

NODE_5411_length_218_cov_1.380368 218

NODE_5412_length_218_cov_1.380368 218

NODE_5413_length_218_cov_1.325153 218

NODE_5414_length_218_cov_1.233129 218

NODE_5415_length_218_cov_1.104294 218

NODE_5416_length_218_cov_1.104294 218

NODE_5417_length_218_cov_1.104294 218

NODE_5418_length_218_cov_1.104294 218

NODE_5419_length_218_cov_1.104294 218

NODE_5420_length_218_cov_1.104294 218

NODE_5421_length_218_cov_1.042945 218

NODE_5422_length_218_cov_0.938650 218

NODE_5423_length_218_cov_0.828221 218

NODE_5424_length_218_cov_0.828221 218

NODE_5425_length_218_cov_0.828221 218

NODE_5426_length_218_cov_0.828221 218

NODE_5427_length_218_cov_0.828221 218

NODE_5428_length_218_cov_0.828221 218

NODE_5429_length_218_cov_0.828221 218

NODE_5430_length_218_cov_0.828221 218

NODE_5431_length_218_cov_0.828221 218

NODE_5432_length_218_cov_0.828221 218

NODE_5433_length_218_cov_0.828221 218

NODE_5434_length_218_cov_0.815951 218

NODE_5435_length_218_cov_0.723926 218

NODE_5436_length_217_cov_223.703704 217

NODE_5437_length_217_cov_104.598765 217

NODE_5438_length_217_cov_3.444444 217

NODE_5439_length_217_cov_1.944444 217

NODE_5440_length_217_cov_1.944444 217

NODE_5441_length_217_cov_1.666667 217

NODE_5442_length_217_cov_1.666667 217

NODE_5443_length_217_cov_1.666667 217

NODE_5444_length_217_cov_1.666667 217

NODE_5445_length_217_cov_1.388889 217

NODE_5446_length_217_cov_1.388889 217

NODE_5447_length_217_cov_1.388889 217

NODE_5448_length_217_cov_1.388889 217

NODE_5449_length_217_cov_1.388889 217

NODE_5450_length_217_cov_1.388889 217

NODE_5451_length_217_cov_1.388889 217

NODE_5452_length_217_cov_1.388889 217

NODE_5453_length_217_cov_1.314815 217

NODE_5454_length_217_cov_1.253086 217

NODE_5455_length_217_cov_1.111111 217

NODE_5456_length_217_cov_1.111111 217

NODE_5457_length_217_cov_1.111111 217

NODE_5458_length_217_cov_1.111111 217

NODE_5459_length_217_cov_1.111111 217

NODE_5460_length_217_cov_1.111111 217

NODE_5461_length_217_cov_1.111111 217

NODE_5462_length_217_cov_1.111111 217

NODE_5463_length_217_cov_1.111111 217

NODE_5464_length_217_cov_1.111111 217

NODE_5465_length_217_cov_1.111111 217

NODE_5466_length_217_cov_1.111111 217

NODE_5467_length_217_cov_1.111111 217

NODE_5468_length_217_cov_1.104938 217

NODE_5469_length_217_cov_1.067901 217

NODE_5470_length_217_cov_1.000000 217

NODE_5471_length_217_cov_0.975309 217

NODE_5472_length_217_cov_0.833333 217

NODE_5473_length_217_cov_0.833333 217

NODE_5474_length_217_cov_0.833333 217

NODE_5475_length_217_cov_0.833333 217

NODE_5476_length_217_cov_0.833333 217

NODE_5477_length_217_cov_0.833333 217

NODE_5478_length_217_cov_0.833333 217

NODE_5479_length_217_cov_0.833333 217

NODE_5480_length_217_cov_0.833333 217

NODE_5481_length_217_cov_0.833333 217

NODE_5482_length_217_cov_0.833333 217

NODE_5483_length_217_cov_0.734568 217

NODE_5484_length_217_cov_0.722222 217

NODE_5485_length_216_cov_224.472050 216

NODE_5486_length_216_cov_16.844720 216

NODE_5487_length_216_cov_3.583851 216

NODE_5488_length_216_cov_2.142857 216

NODE_5489_length_216_cov_1.956522 216

NODE_5490_length_216_cov_1.881988 216

NODE_5491_length_216_cov_1.677019 216

NODE_5492_length_216_cov_1.677019 216

NODE_5493_length_216_cov_1.677019 216

NODE_5494_length_216_cov_1.409938 216

NODE_5495_length_216_cov_1.397516 216

NODE_5496_length_216_cov_1.397516 216

NODE_5497_length_216_cov_1.397516 216

NODE_5498_length_216_cov_1.397516 216

NODE_5499_length_216_cov_1.397516 216

NODE_5500_length_216_cov_1.391304 216

NODE_5501_length_216_cov_1.341615 216

NODE_5502_length_216_cov_1.149068 216

NODE_5503_length_216_cov_1.118012 216

NODE_5504_length_216_cov_1.118012 216

NODE_5505_length_216_cov_1.118012 216

NODE_5506_length_216_cov_1.118012 216

NODE_5507_length_216_cov_1.118012 216

NODE_5508_length_216_cov_1.118012 216

NODE_5509_length_216_cov_1.118012 216

NODE_5510_length_216_cov_1.118012 216

NODE_5511_length_216_cov_1.118012 216

NODE_5512_length_216_cov_1.118012 216

NODE_5513_length_216_cov_1.099379 216

NODE_5514_length_216_cov_1.086957 216

NODE_5515_length_216_cov_0.956522 216

NODE_5516_length_216_cov_0.838509 216

NODE_5517_length_216_cov_0.838509 216

NODE_5518_length_216_cov_0.838509 216

NODE_5519_length_216_cov_0.838509 216

NODE_5520_length_216_cov_0.838509 216

NODE_5521_length_216_cov_0.838509 216

NODE_5522_length_216_cov_0.838509 216

NODE_5523_length_216_cov_0.838509 216

NODE_5524_length_216_cov_0.838509 216

NODE_5525_length_216_cov_0.838509 216

NODE_5526_length_216_cov_0.838509 216

NODE_5527_length_216_cov_0.788820 216

NODE_5528_length_216_cov_0.757764 216

NODE_5529_length_215_cov_7.281250 215

NODE_5530_length_215_cov_2.325000 215

NODE_5531_length_215_cov_1.687500 215

NODE_5532_length_215_cov_1.687500 215

NODE_5533_length_215_cov_1.687500 215

NODE_5534_length_215_cov_1.687500 215

NODE_5535_length_215_cov_1.406250 215

NODE_5536_length_215_cov_1.406250 215

NODE_5537_length_215_cov_1.406250 215

NODE_5538_length_215_cov_1.406250 215

NODE_5539_length_215_cov_1.156250 215

NODE_5540_length_215_cov_1.125000 215

NODE_5541_length_215_cov_1.125000 215

NODE_5542_length_215_cov_1.125000 215

NODE_5543_length_215_cov_1.125000 215

NODE_5544_length_215_cov_1.125000 215

NODE_5545_length_215_cov_1.125000 215

NODE_5546_length_215_cov_1.125000 215

NODE_5547_length_215_cov_1.081250 215

NODE_5548_length_215_cov_1.062500 215

NODE_5549_length_215_cov_0.843750 215

NODE_5550_length_215_cov_0.843750 215

NODE_5551_length_215_cov_0.843750 215

NODE_5552_length_215_cov_0.843750 215

NODE_5553_length_215_cov_0.843750 215

NODE_5554_length_215_cov_0.843750 215

NODE_5555_length_215_cov_0.843750 215

NODE_5556_length_215_cov_0.837500 215

NODE_5557_length_215_cov_0.793750 215

NODE_5558_length_215_cov_0.756250 215

NODE_5559_length_215_cov_0.681250 215

NODE_5560_length_214_cov_168.641509 214

NODE_5561_length_214_cov_1.981132 214

NODE_5562_length_214_cov_1.641509 214

NODE_5563_length_214_cov_1.603774 214

NODE_5564_length_214_cov_1.415094 214

NODE_5565_length_214_cov_1.415094 214

NODE_5566_length_214_cov_1.415094 214

NODE_5567_length_214_cov_1.415094 214

NODE_5568_length_214_cov_1.402516 214

NODE_5569_length_214_cov_1.383648 214

NODE_5570_length_214_cov_1.194969 214

NODE_5571_length_214_cov_1.132075 214

NODE_5572_length_214_cov_1.132075 214

NODE_5573_length_214_cov_1.132075 214

NODE_5574_length_214_cov_1.132075 214

NODE_5575_length_214_cov_1.132075 214

NODE_5576_length_214_cov_0.849057 214

NODE_5577_length_214_cov_0.849057 214

NODE_5578_length_214_cov_0.849057 214

NODE_5579_length_214_cov_0.849057 214

NODE_5580_length_214_cov_0.849057 214

NODE_5581_length_214_cov_0.849057 214

NODE_5582_length_214_cov_0.849057 214

NODE_5583_length_214_cov_0.849057 214

NODE_5584_length_214_cov_0.849057 214

NODE_5585_length_214_cov_0.849057 214

NODE_5586_length_214_cov_0.836478 214

NODE_5587_length_214_cov_0.823899 214

NODE_5588_length_214_cov_0.823899 214

NODE_5589_length_214_cov_0.798742 214

NODE_5590_length_214_cov_0.698113 214

NODE_5591_length_213_cov_4827.202532 213

NODE_5592_length_213_cov_2.563291 213

NODE_5593_length_213_cov_1.708861 213

NODE_5594_length_213_cov_1.702532 213

NODE_5595_length_213_cov_1.620253 213

NODE_5596_length_213_cov_1.424051 213

NODE_5597_length_213_cov_1.424051 213

NODE_5598_length_213_cov_1.424051 213

NODE_5599_length_213_cov_1.424051 213

NODE_5600_length_213_cov_1.424051 213

NODE_5601_length_213_cov_1.139241 213

NODE_5602_length_213_cov_1.139241 213

NODE_5603_length_213_cov_1.139241 213

NODE_5604_length_213_cov_1.139241 213

NODE_5605_length_213_cov_0.962025 213

NODE_5606_length_213_cov_0.854430 213

NODE_5607_length_213_cov_0.854430 213

NODE_5608_length_213_cov_0.854430 213

NODE_5609_length_213_cov_0.854430 213

NODE_5610_length_213_cov_0.854430 213

NODE_5611_length_213_cov_0.854430 213

NODE_5612_length_213_cov_0.854430 213

NODE_5613_length_213_cov_0.854430 213

NODE_5614_length_213_cov_0.816456 213

NODE_5615_length_213_cov_0.797468 213

NODE_5616_length_213_cov_0.772152 213

NODE_5617_length_213_cov_0.765823 213

NODE_5618_length_213_cov_0.493671 213

NODE_5619_length_212_cov_2.579618 212

NODE_5620_length_212_cov_1.942675 212

NODE_5621_length_212_cov_1.834395 212

NODE_5622_length_212_cov_1.719745 212

NODE_5623_length_212_cov_1.433121 212

NODE_5624_length_212_cov_1.433121 212

NODE_5625_length_212_cov_1.433121 212

NODE_5626_length_212_cov_1.407643 212

NODE_5627_length_212_cov_1.267516 212

NODE_5628_length_212_cov_1.261146 212

NODE_5629_length_212_cov_1.146497 212

NODE_5630_length_212_cov_1.146497 212

NODE_5631_length_212_cov_1.146497 212

NODE_5632_length_212_cov_1.146497 212

NODE_5633_length_212_cov_1.146497 212

NODE_5634_length_212_cov_1.146497 212

NODE_5635_length_212_cov_1.146497 212

NODE_5636_length_212_cov_1.146497 212

NODE_5637_length_212_cov_1.114650 212

NODE_5638_length_212_cov_1.012739 212

NODE_5639_length_212_cov_0.859873 212

NODE_5640_length_212_cov_0.859873 212

NODE_5641_length_212_cov_0.859873 212

NODE_5642_length_212_cov_0.859873 212

NODE_5643_length_212_cov_0.859873 212

NODE_5644_length_212_cov_0.859873 212

NODE_5645_length_212_cov_0.859873 212

NODE_5646_length_212_cov_0.859873 212

NODE_5647_length_212_cov_0.859873 212

NODE_5648_length_212_cov_0.859873 212

NODE_5649_length_212_cov_0.859873 212

NODE_5650_length_212_cov_0.859873 212

NODE_5651_length_212_cov_0.528662 212

NODE_5652_length_211_cov_197.083333 211

NODE_5653_length_211_cov_2.057692 211

NODE_5654_length_211_cov_2.019231 211

NODE_5655_length_211_cov_1.967949 211

NODE_5656_length_211_cov_1.762821 211

NODE_5657_length_211_cov_1.730769 211

NODE_5658_length_211_cov_1.730769 211

NODE_5659_length_211_cov_1.730769 211

NODE_5660_length_211_cov_1.512821 211

NODE_5661_length_211_cov_1.442308 211

NODE_5662_length_211_cov_1.442308 211

NODE_5663_length_211_cov_1.403846 211

NODE_5664_length_211_cov_1.326923 211

NODE_5665_length_211_cov_1.153846 211

NODE_5666_length_211_cov_1.153846 211

NODE_5667_length_211_cov_1.153846 211

NODE_5668_length_211_cov_1.153846 211

NODE_5669_length_211_cov_1.153846 211

NODE_5670_length_211_cov_1.102564 211

NODE_5671_length_211_cov_1.096154 211

NODE_5672_length_211_cov_1.096154 211

NODE_5673_length_211_cov_1.064103 211

NODE_5674_length_211_cov_0.916667 211

NODE_5675_length_211_cov_0.891026 211

NODE_5676_length_211_cov_0.871795 211

NODE_5677_length_211_cov_0.865385 211

NODE_5678_length_211_cov_0.865385 211

NODE_5679_length_211_cov_0.865385 211

NODE_5680_length_211_cov_0.865385 211

NODE_5681_length_211_cov_0.865385 211

NODE_5682_length_211_cov_0.865385 211

NODE_5683_length_211_cov_0.865385 211

NODE_5684_length_211_cov_0.865385 211

NODE_5685_length_211_cov_0.865385 211

NODE_5686_length_211_cov_0.865385 211

NODE_5687_length_211_cov_0.756410 211

NODE_5688_length_211_cov_0.730769 211

NODE_5689_length_211_cov_0.576923 211

NODE_5690_length_211_cov_0.570513 211

NODE_5691_length_211_cov_0.493590 211

NODE_5692_length_210_cov_107.103226 210

NODE_5693_length_210_cov_9.348387 210

NODE_5694_length_210_cov_2.032258 210

NODE_5695_length_210_cov_1.741935 210

NODE_5696_length_210_cov_1.741935 210

NODE_5697_length_210_cov_1.729032 210

NODE_5698_length_210_cov_1.451613 210

NODE_5699_length_210_cov_1.451613 210

NODE_5700_length_210_cov_1.445161 210

NODE_5701_length_210_cov_1.361290 210

NODE_5702_length_210_cov_1.270968 210

NODE_5703_length_210_cov_1.161290 210

NODE_5704_length_210_cov_1.161290 210

NODE_5705_length_210_cov_1.161290 210

NODE_5706_length_210_cov_1.161290 210

NODE_5707_length_210_cov_1.161290 210

NODE_5708_length_210_cov_1.161290 210

NODE_5709_length_210_cov_1.161290 210

NODE_5710_length_210_cov_1.161290 210

NODE_5711_length_210_cov_1.161290 210

NODE_5712_length_210_cov_1.154839 210

NODE_5713_length_210_cov_1.141935 210

NODE_5714_length_210_cov_1.109677 210

NODE_5715_length_210_cov_1.090323 210

NODE_5716_length_210_cov_1.006452 210

NODE_5717_length_210_cov_1.006452 210

NODE_5718_length_210_cov_0.987097 210

NODE_5719_length_210_cov_0.877419 210

NODE_5720_length_210_cov_0.870968 210

NODE_5721_length_210_cov_0.870968 210

NODE_5722_length_210_cov_0.870968 210

NODE_5723_length_210_cov_0.870968 210

NODE_5724_length_210_cov_0.870968 210

NODE_5725_length_210_cov_0.870968 210

NODE_5726_length_210_cov_0.870968 210

NODE_5727_length_210_cov_0.870968 210

NODE_5728_length_210_cov_0.870968 210

NODE_5729_length_210_cov_0.870968 210

NODE_5730_length_210_cov_0.870968 210

NODE_5731_length_210_cov_0.870968 210

NODE_5732_length_210_cov_0.870968 210

NODE_5733_length_210_cov_0.870968 210

NODE_5734_length_210_cov_0.870968 210

NODE_5735_length_210_cov_0.870968 210

NODE_5736_length_210_cov_0.870968 210

NODE_5737_length_210_cov_0.864516 210

NODE_5738_length_210_cov_0.800000 210

NODE_5739_length_210_cov_0.683871 210

NODE_5740_length_210_cov_0.677419 210

NODE_5741_length_209_cov_16.629870 209

NODE_5742_length_209_cov_7.824675 209

NODE_5743_length_209_cov_2.045455 209

NODE_5744_length_209_cov_1.902597 209

NODE_5745_length_209_cov_1.753247 209

NODE_5746_length_209_cov_1.461039 209

NODE_5747_length_209_cov_1.461039 209

NODE_5748_length_209_cov_1.461039 209

NODE_5749_length_209_cov_1.461039 209

NODE_5750_length_209_cov_1.461039 209

NODE_5751_length_209_cov_1.389610 209

NODE_5752_length_209_cov_1.376623 209

NODE_5753_length_209_cov_1.168831 209

NODE_5754_length_209_cov_1.168831 209

NODE_5755_length_209_cov_1.168831 209

NODE_5756_length_209_cov_1.168831 209

NODE_5757_length_209_cov_1.168831 209

NODE_5758_length_209_cov_1.168831 209

NODE_5759_length_209_cov_1.168831 209

NODE_5760_length_209_cov_1.168831 209

NODE_5761_length_209_cov_1.168831 209

NODE_5762_length_209_cov_1.168831 209

NODE_5763_length_209_cov_1.168831 209

NODE_5764_length_209_cov_1.168831 209

NODE_5765_length_209_cov_1.149351 209

NODE_5766_length_209_cov_1.136364 209

NODE_5767_length_209_cov_0.935065 209

NODE_5768_length_209_cov_0.876623 209

NODE_5769_length_209_cov_0.876623 209

NODE_5770_length_209_cov_0.876623 209

NODE_5771_length_209_cov_0.876623 209

NODE_5772_length_209_cov_0.876623 209

NODE_5773_length_209_cov_0.876623 209

NODE_5774_length_209_cov_0.876623 209

NODE_5775_length_209_cov_0.876623 209

NODE_5776_length_209_cov_0.876623 209

NODE_5777_length_209_cov_0.876623 209

NODE_5778_length_209_cov_0.876623 209

NODE_5779_length_209_cov_0.863636 209

NODE_5780_length_209_cov_0.857143 209

NODE_5781_length_209_cov_0.818182 209

NODE_5782_length_208_cov_3.673203 208

NODE_5783_length_208_cov_2.352941 208

NODE_5784_length_208_cov_1.764706 208

NODE_5785_length_208_cov_1.764706 208

NODE_5786_length_208_cov_1.764706 208

NODE_5787_length_208_cov_1.764706 208

NODE_5788_length_208_cov_1.764706 208

NODE_5789_length_208_cov_1.764706 208

NODE_5790_length_208_cov_1.542484 208

NODE_5791_length_208_cov_1.470588 208

NODE_5792_length_208_cov_1.470588 208

NODE_5793_length_208_cov_1.470588 208

NODE_5794_length_208_cov_1.470588 208

NODE_5795_length_208_cov_1.470588 208

NODE_5796_length_208_cov_1.470588 208

NODE_5797_length_208_cov_1.470588 208

NODE_5798_length_208_cov_1.366013 208

NODE_5799_length_208_cov_1.320261 208

NODE_5800_length_208_cov_1.320261 208

NODE_5801_length_208_cov_1.176471 208

NODE_5802_length_208_cov_1.176471 208

NODE_5803_length_208_cov_1.176471 208

NODE_5804_length_208_cov_1.176471 208

NODE_5805_length_208_cov_1.176471 208

NODE_5806_length_208_cov_1.176471 208

NODE_5807_length_208_cov_1.176471 208

NODE_5808_length_208_cov_1.169935 208

NODE_5809_length_208_cov_1.130719 208

NODE_5810_length_208_cov_1.078431 208

NODE_5811_length_208_cov_1.039216 208

NODE_5812_length_208_cov_0.901961 208

NODE_5813_length_208_cov_0.882353 208

NODE_5814_length_208_cov_0.882353 208

NODE_5815_length_208_cov_0.882353 208

NODE_5816_length_208_cov_0.882353 208

NODE_5817_length_208_cov_0.882353 208

NODE_5818_length_208_cov_0.882353 208

NODE_5819_length_208_cov_0.882353 208

NODE_5820_length_208_cov_0.882353 208

NODE_5821_length_208_cov_0.882353 208

NODE_5822_length_208_cov_0.882353 208

NODE_5823_length_208_cov_0.882353 208

NODE_5824_length_208_cov_0.882353 208

NODE_5825_length_208_cov_0.882353 208

NODE_5826_length_208_cov_0.882353 208

NODE_5827_length_208_cov_0.875817 208

NODE_5828_length_208_cov_0.856209 208

NODE_5829_length_208_cov_0.816993 208

NODE_5830_length_208_cov_0.803922 208

NODE_5831_length_208_cov_0.738562 208

NODE_5832_length_207_cov_50.092105 207

NODE_5833_length_207_cov_2.664474 207

NODE_5834_length_207_cov_2.046053 207

NODE_5835_length_207_cov_1.921053 207

NODE_5836_length_207_cov_1.842105 207

NODE_5837_length_207_cov_1.776316 207

NODE_5838_length_207_cov_1.776316 207

NODE_5839_length_207_cov_1.559211 207

NODE_5840_length_207_cov_1.480263 207

NODE_5841_length_207_cov_1.480263 207

NODE_5842_length_207_cov_1.480263 207

NODE_5843_length_207_cov_1.480263 207

NODE_5844_length_207_cov_1.480263 207

NODE_5845_length_207_cov_1.473684 207

NODE_5846_length_207_cov_1.407895 207

NODE_5847_length_207_cov_1.184211 207

NODE_5848_length_207_cov_1.184211 207

NODE_5849_length_207_cov_1.184211 207

NODE_5850_length_207_cov_1.184211 207

NODE_5851_length_207_cov_1.184211 207

NODE_5852_length_207_cov_1.184211 207

NODE_5853_length_207_cov_1.184211 207

NODE_5854_length_207_cov_1.184211 207

NODE_5855_length_207_cov_1.138158 207

NODE_5856_length_207_cov_1.078947 207

NODE_5857_length_207_cov_1.072368 207

NODE_5858_length_207_cov_0.888158 207

NODE_5859_length_207_cov_0.888158 207

NODE_5860_length_207_cov_0.888158 207

NODE_5861_length_207_cov_0.888158 207

NODE_5862_length_207_cov_0.888158 207

NODE_5863_length_207_cov_0.888158 207

NODE_5864_length_207_cov_0.888158 207

NODE_5865_length_207_cov_0.888158 207

NODE_5866_length_207_cov_0.888158 207

NODE_5867_length_207_cov_0.888158 207

NODE_5868_length_207_cov_0.703947 207

NODE_5869_length_207_cov_0.690789 207

NODE_5870_length_206_cov_6.814570 206

NODE_5871_length_206_cov_2.384106 206

NODE_5872_length_206_cov_1.788079 206

NODE_5873_length_206_cov_1.788079 206

NODE_5874_length_206_cov_1.490066 206

NODE_5875_length_206_cov_1.490066 206

NODE_5876_length_206_cov_1.483444 206

NODE_5877_length_206_cov_1.291391 206

NODE_5878_length_206_cov_1.258278 206

NODE_5879_length_206_cov_1.192053 206

NODE_5880_length_206_cov_1.192053 206

NODE_5881_length_206_cov_1.192053 206

NODE_5882_length_206_cov_1.192053 206

NODE_5883_length_206_cov_1.192053 206

NODE_5884_length_206_cov_1.192053 206

NODE_5885_length_206_cov_1.192053 206

NODE_5886_length_206_cov_1.192053 206

NODE_5887_length_206_cov_0.894040 206

NODE_5888_length_206_cov_0.894040 206

NODE_5889_length_206_cov_0.894040 206

NODE_5890_length_206_cov_0.894040 206

NODE_5891_length_206_cov_0.894040 206

NODE_5892_length_206_cov_0.894040 206

NODE_5893_length_206_cov_0.894040 206

NODE_5894_length_206_cov_0.894040 206

NODE_5895_length_206_cov_0.894040 206

NODE_5896_length_206_cov_0.894040 206

NODE_5897_length_206_cov_0.894040 206

NODE_5898_length_206_cov_0.894040 206

NODE_5899_length_206_cov_0.894040 206

NODE_5900_length_206_cov_0.894040 206

NODE_5901_length_206_cov_0.841060 206

NODE_5902_length_206_cov_0.781457 206

NODE_5903_length_206_cov_0.761589 206

NODE_5904_length_206_cov_0.735099 206

NODE_5905_length_205_cov_35.546667 205

NODE_5906_length_204_cov_2.395973 204

NODE_5907_length_204_cov_2.167785 204

NODE_5908_length_204_cov_1.993289 204

NODE_5909_length_203_cov_1049.587838 203

NODE_5910_length_203_cov_69.986486 203

NODE_5911_length_202_cov_12.224490 202

NODE_5912_length_202_cov_1.401361 202

NODE_5913_length_201_cov_2.219178 201

NODE_5914_length_201_cov_1.808219 201

NODE_5915_length_200_cov_1.462069 200

NODE_5916_length_200_cov_1.331034 200

NODE_5917_length_198_cov_45.272727 198

NODE_5918_length_197_cov_2073.309859 197

NODE_5919_length_197_cov_3.042254 197

NODE_5920_length_197_cov_2.753521 197

NODE_5921_length_196_cov_2.163121 196

NODE_5922_length_195_cov_2.135714 195

NODE_5923_length_194_cov_73.446043 194

NODE_5924_length_194_cov_1.553957 194

NODE_5925_length_192_cov_252.605839 192

NODE_5926_length_192_cov_30.919708 192

NODE_5927_length_192_cov_4.642336 192

NODE_5928_length_191_cov_126.661765 191

NODE_5929_length_191_cov_121.845588 191

NODE_5930_length_190_cov_162.733333 190

NODE_5931_length_190_cov_2.533333 190

NODE_5932_length_188_cov_34.022556 188

NODE_5933_length_188_cov_3.165414 188

NODE_5934_length_188_cov_2.157895 188

NODE_5935_length_187_cov_2.681818 187

NODE_5936_length_186_cov_24.045802 186

NODE_5937_length_185_cov_58.184615 185

NODE_5938_length_185_cov_3.800000 185

NODE_5939_length_184_cov_2.434109 184

NODE_5940_length_183_cov_2.906250 183

NODE_5941_length_183_cov_1.679688 183

NODE_5942_length_182_cov_5884.409449 182

NODE_5943_length_182_cov_13.228346 182

NODE_5944_length_182_cov_2.401575 182

NODE_5945_length_181_cov_10.611111 181

NODE_5946_length_180_cov_113.648000 180

NODE_5947_length_180_cov_1.808000 180

NODE_5948_length_179_cov_2.096774 179

NODE_5949_length_179_cov_2.008065 179

NODE_5950_length_179_cov_1.943548 179

NODE_5951_length_179_cov_1.596774 179

NODE_5952_length_178_cov_6.089431 178

NODE_5953_length_178_cov_3.000000 178

NODE_5954_length_178_cov_1.512195 178

NODE_5955_length_177_cov_2.278689 177

NODE_5956_length_177_cov_1.983607 177

NODE_5957_length_176_cov_792.355372 176

NODE_5958_length_176_cov_329.239669 176

NODE_5959_length_176_cov_54.586777 176

NODE_5960_length_176_cov_45.198347 176

NODE_5961_length_176_cov_2.520661 176

NODE_5962_length_175_cov_63.191667 175

NODE_5963_length_175_cov_35.325000 175

NODE_5964_length_175_cov_27.058333 175

NODE_5965_length_175_cov_2.541667 175

NODE_5966_length_174_cov_1.789916 174

NODE_5967_length_173_cov_37.245763 173

NODE_5968_length_173_cov_3.169492 173

NODE_5969_length_173_cov_3.000000 173

NODE_5970_length_173_cov_2.245763 173

NODE_5971_length_172_cov_59.760684 172

NODE_5972_length_171_cov_5.094828 171

NODE_5973_length_171_cov_2.689655 171

NODE_5974_length_171_cov_2.517241 171

NODE_5975_length_171_cov_2.129310 171

NODE_5976_length_170_cov_16.617391 170

NODE_5977_length_170_cov_2.373913 170

NODE_5978_length_170_cov_2.339130 170

NODE_5979_length_169_cov_78.543860 169

NODE_5980_length_169_cov_20.429825 169

NODE_5981_length_168_cov_4.433628 168

NODE_5982_length_168_cov_2.256637 168

NODE_5983_length_167_cov_46.375000 167

NODE_5984_length_167_cov_2.732143 167

NODE_5985_length_167_cov_2.321429 167

NODE_5986_length_166_cov_305.477477 166

NODE_5987_length_166_cov_144.954955 166

NODE_5988_length_166_cov_2.540541 166

NODE_5989_length_165_cov_12.627273 165

NODE_5990_length_164_cov_102.798165 164

NODE_5991_length_164_cov_21.073394 164

NODE_5992_length_164_cov_3.559633 164

NODE_5993_length_164_cov_1.917431 164

NODE_5994_length_163_cov_35.768519 163

NODE_5995_length_163_cov_2.296296 163

NODE_5996_length_163_cov_1.453704 163

NODE_5997_length_162_cov_126.560748 162

NODE_5998_length_162_cov_1.971963 162

NODE_5999_length_161_cov_6751.754717 161

NODE_6000_length_161_cov_204.320755 161

NODE_6001_length_161_cov_3.613208 161

NODE_6002_length_161_cov_2.018868 161

NODE_6003_length_160_cov_2.714286 160

NODE_6004_length_159_cov_101.865385 159

NODE_6005_length_159_cov_57.000000 159

NODE_6006_length_159_cov_24.336538 159

NODE_6007_length_159_cov_3.105769 159

NODE_6008_length_158_cov_86.029126 158

NODE_6009_length_157_cov_81.598039 157

NODE_6010_length_157_cov_7.774510 157

NODE_6011_length_157_cov_3.176471 157

NODE_6012_length_157_cov_1.715686 157

NODE_6013_length_156_cov_12.623762 156

NODE_6014_length_156_cov_1.851485 156

NODE_6015_length_155_cov_84.140000 155

NODE_6016_length_155_cov_38.510000 155

NODE_6017_length_155_cov_34.500000 155

NODE_6018_length_155_cov_13.510000 155

NODE_6019_length_155_cov_7.600000 155

NODE_6020_length_155_cov_2.410000 155

NODE_6021_length_154_cov_195.151515 154

NODE_6022_length_153_cov_2.132653 153

NODE_6023_length_152_cov_38.845361 152

NODE_6024_length_152_cov_3.154639 152

NODE_6025_length_151_cov_3.093750 151

NODE_6026_length_151_cov_2.500000 151

NODE_6027_length_151_cov_2.489583 151

NODE_6028_length_151_cov_1.822917 151

NODE_6029_length_151_cov_1.812500 151

NODE_6030_length_151_cov_0.916667 151

NODE_6031_length_149_cov_102.297872 149

NODE_6032_length_149_cov_82.265957 149

NODE_6033_length_149_cov_24.702128 149

NODE_6034_length_148_cov_276.827957 148

NODE_6035_length_148_cov_1.752688 148

NODE_6036_length_147_cov_88.880435 147

NODE_6037_length_147_cov_82.250000 147

NODE_6038_length_147_cov_3.500000 147

NODE_6039_length_147_cov_1.793478 147

NODE_6040_length_146_cov_259.186813 146

NODE_6041_length_146_cov_2.835165 146

NODE_6042_length_146_cov_1.802198 146

NODE_6043_length_146_cov_1.417582 146

NODE_6044_length_145_cov_2.777778 145

NODE_6045_length_145_cov_1.000000 145

NODE_6046_length_144_cov_23.471910 144

NODE_6047_length_143_cov_82.034091 143

NODE_6048_length_143_cov_45.670455 143

NODE_6049_length_143_cov_16.715909 143

NODE_6050_length_142_cov_103.264368 142

NODE_6051_length_142_cov_86.344828 142

NODE_6052_length_142_cov_28.229885 142

NODE_6053_length_141_cov_563.197674 141

NODE_6054_length_140_cov_3735.529412 140

NODE_6055_length_140_cov_226.905882 140

NODE_6056_length_140_cov_113.811765 140

NODE_6057_length_140_cov_11.870588 140

NODE_6058_length_138_cov_2868.289157 138

NODE_6059_length_138_cov_2097.686747 138

NODE_6060_length_138_cov_250.493976 138

NODE_6061_length_137_cov_2859.804878 137

NODE_6062_length_137_cov_164.280488 137

NODE_6063_length_135_cov_219.037500 135

NODE_6064_length_134_cov_3387.367089 134

NODE_6065_length_134_cov_2401.189873 134

NODE_6066_length_134_cov_34.468354 134

NODE_6067_length_134_cov_3.430380 134

NODE_6068_length_132_cov_51.038961 132

NODE_6069_length_131_cov_1070.289474 131

NODE_6070_length_130_cov_250.880000 130

NODE_6071_length_130_cov_26.386667 130

NODE_6072_length_130_cov_15.213333 130

NODE_6073_length_129_cov_4597.283784 129

NODE_6074_length_129_cov_991.851351 129

NODE_6075_length_129_cov_25.162162 129

NODE_6076_length_128_cov_134.164384 128

NODE_6077_length_128_cov_69.150685 128

NODE_6078_length_127_cov_116.680556 127

NODE_6079_length_126_cov_285.492958 126

NODE_6080_length_125_cov_43.285714 125

NODE_6081_length_124_cov_108.478261 124

NODE_6082_length_124_cov_31.637681 124

NODE_6083_length_124_cov_0.652174 124

NODE_6084_length_124_cov_0.579710 124

NODE_6085_length_122_cov_674.940299 122

NODE_6086_length_121_cov_502.030303 121

NODE_6087_length_121_cov_283.803030 121

NODE_6088_length_121_cov_153.075758 121

NODE_6089_length_121_cov_69.606061 121

NODE_6090_length_121_cov_48.424242 121

NODE_6091_length_121_cov_35.166667 121

NODE_6092_length_121_cov_3.666667 121

NODE_6093_length_120_cov_1220.123077 120

NODE_6094_length_120_cov_48.215385 120

NODE_6095_length_119_cov_9.656250 119

NODE_6096_length_119_cov_2.531250 119

NODE_6097_length_118_cov_2067.111111 118

NODE_6098_length_118_cov_10.238095 118

NODE_6099_length_118_cov_0.682540 118

NODE_6100_length_117_cov_5594.564516 117

NODE_6101_length_117_cov_1885.467742 117

NODE_6102_length_117_cov_640.338710 117

NODE_6103_length_117_cov_102.903226 117

NODE_6104_length_117_cov_42.354839 117

NODE_6105_length_116_cov_8.540984 116

NODE_6106_length_115_cov_264.666667 115

NODE_6107_length_115_cov_128.000000 115

NODE_6108_length_115_cov_50.733333 115

NODE_6109_length_114_cov_2009.966102 114

NODE_6110_length_114_cov_9.288136 114

NODE_6111_length_114_cov_3.152542 114

NODE_6112_length_112_cov_351.842105 112

NODE_6113_length_112_cov_8.736842 112

NODE_6114_length_112_cov_4.140351 112

NODE_6115_length_112_cov_3.105263 112

NODE_6116_length_111_cov_5273.214286 111

NODE_6117_length_111_cov_919.178571 111

NODE_6118_length_111_cov_712.464286 111

NODE_6119_length_111_cov_395.303571 111

NODE_6120_length_111_cov_191.214286 111

NODE_6121_length_111_cov_165.071429 111

NODE_6122_length_111_cov_88.017857 111

NODE_6123_length_111_cov_79.410714 111

NODE_6124_length_111_cov_34.535714 111

NODE_6125_length_111_cov_33.946429 111

NODE_6126_length_111_cov_25.160714 111

NODE_6127_length_111_cov_21.125000 111

NODE_6128_length_111_cov_17.500000 111

NODE_6129_length_111_cov_13.589286 111

NODE_6130_length_111_cov_13.250000 111

NODE_6131_length_111_cov_12.928571 111

NODE_6132_length_111_cov_12.839286 111

NODE_6133_length_111_cov_12.035714 111

NODE_6134_length_111_cov_9.089286 111

NODE_6135_length_111_cov_7.000000 111

NODE_6136_length_111_cov_6.857143 111

NODE_6137_length_111_cov_6.625000 111

NODE_6138_length_111_cov_6.446429 111

NODE_6139_length_111_cov_4.750000 111

NODE_6140_length_111_cov_4.142857 111

NODE_6141_length_110_cov_785.927273 110

NODE_6142_length_110_cov_261.436364 110

NODE_6143_length_110_cov_44.363636 110

NODE_6144_length_110_cov_27.436364 110

NODE_6145_length_110_cov_2.654545 110

NODE_6146_length_109_cov_2312.814815 109

NODE_6147_length_109_cov_931.037037 109

NODE_6148_length_109_cov_224.444444 109

NODE_6149_length_109_cov_119.129630 109

NODE_6150_length_109_cov_54.222222 109

NODE_6151_length_109_cov_35.370370 109

NODE_6152_length_109_cov_33.611111 109

NODE_6153_length_109_cov_31.833333 109

NODE_6154_length_109_cov_13.000000 109

NODE_6155_length_109_cov_11.611111 109

NODE_6156_length_108_cov_740.943396 108

NODE_6157_length_108_cov_221.773585 108

NODE_6158_length_108_cov_209.150943 108

NODE_6159_length_108_cov_106.339623 108

NODE_6160_length_108_cov_100.358491 108

NODE_6161_length_108_cov_89.584906 108

NODE_6162_length_108_cov_40.132075 108

NODE_6163_length_108_cov_25.377358 108

NODE_6164_length_108_cov_12.735849 108

NODE_6165_length_108_cov_9.660377 108

NODE_6166_length_108_cov_7.150943 108

NODE_6167_length_108_cov_2.169811 108

NODE_6168_length_108_cov_0.679245 108

NODE_6169_length_107_cov_4768.461538 107

NODE_6170_length_107_cov_848.365385 107

NODE_6171_length_107_cov_797.730769 107

NODE_6172_length_107_cov_225.115385 107

NODE_6173_length_107_cov_68.538462 107

NODE_6174_length_107_cov_22.596154 107

NODE_6175_length_107_cov_12.615385 107

NODE_6176_length_107_cov_9.096154 107

NODE_6177_length_107_cov_6.807692 107

NODE_6178_length_107_cov_4.230769 107

NODE_6179_length_107_cov_2.769231 107

NODE_6180_length_107_cov_1.538462 107

NODE_6181_length_106_cov_1698.588235 106

NODE_6182_length_106_cov_1128.274510 106

NODE_6183_length_106_cov_597.509804 106

NODE_6184_length_106_cov_377.882353 106

NODE_6185_length_106_cov_123.745098 106

NODE_6186_length_106_cov_58.549020 106

NODE_6187_length_106_cov_33.352941 106

NODE_6188_length_106_cov_20.078431 106

NODE_6189_length_105_cov_182.400000 105

NODE_6190_length_105_cov_171.320000 105

NODE_6191_length_105_cov_57.780000 105

NODE_6192_length_105_cov_54.000000 105

NODE_6193_length_105_cov_11.500000 105

NODE_6194_length_105_cov_8.500000 105

NODE_6195_length_105_cov_6.600000 105

NODE_6196_length_105_cov_6.020000 105

NODE_6197_length_105_cov_5.940000 105

NODE_6198_length_105_cov_2.840000 105

NODE_6199_length_104_cov_1005.183673 104

NODE_6200_length_104_cov_276.959184 104

NODE_6201_length_104_cov_172.367347 104

NODE_6202_length_104_cov_117.061224 104

NODE_6203_length_104_cov_69.897959 104

NODE_6204_length_104_cov_9.040816 104

NODE_6205_length_104_cov_7.551020 104

NODE_6206_length_104_cov_5.795918 104

NODE_6207_length_104_cov_5.367347 104

NODE_6208_length_104_cov_3.673469 104

NODE_6209_length_103_cov_724.458333 103

NODE_6210_length_103_cov_50.666667 103

NODE_6211_length_103_cov_7.062500 103

NODE_6212_length_102_cov_11530.000000 102

NODE_6213_length_102_cov_2832.319149 102

NODE_6214_length_102_cov_803.425532 102

NODE_6215_length_102_cov_61.765957 102

NODE_6216_length_102_cov_59.744681 102

NODE_6217_length_102_cov_22.936170 102

NODE_6218_length_102_cov_21.319149 102

NODE_6219_length_102_cov_13.531915 102

NODE_6220_length_102_cov_12.723404 102

NODE_6221_length_102_cov_12.234043 102

NODE_6222_length_102_cov_2.638298 102

NODE_6223_length_101_cov_164.739130 101

NODE_6224_length_101_cov_74.826087 101

NODE_6225_length_101_cov_51.913043 101

NODE_6226_length_101_cov_11.652174 101

NODE_6227_length_101_cov_4.565217 101

NODE_6228_length_101_cov_1.869565 101

NODE_6229_length_100_cov_2688.777778 100

NODE_6230_length_100_cov_1776.000000 100

NODE_6231_length_100_cov_408.644444 100

NODE_6232_length_100_cov_93.155556 100

NODE_6233_length_100_cov_20.155556 100

NODE_6234_length_100_cov_3.911111 100

NODE_6235_length_99_cov_3686.022727 99

NODE_6236_length_99_cov_2365.159091 99

NODE_6237_length_99_cov_1336.250000 99

NODE_6238_length_99_cov_181.772727 99

NODE_6239_length_99_cov_169.636364 99

NODE_6240_length_99_cov_31.545455 99

NODE_6241_length_99_cov_14.318182 99

NODE_6242_length_99_cov_5.045455 99

NODE_6243_length_99_cov_2.613636 99

NODE_6244_length_98_cov_563.279070 98

NODE_6245_length_98_cov_175.348837 98

NODE_6246_length_98_cov_61.674419 98

NODE_6247_length_98_cov_55.232558 98

NODE_6248_length_98_cov_8.883721 98

NODE_6249_length_98_cov_3.279070 98

NODE_6250_length_97_cov_580.642857 97

NODE_6251_length_97_cov_73.023810 97

NODE_6252_length_97_cov_61.404762 97

NODE_6253_length_97_cov_20.523810 97

NODE_6254_length_97_cov_9.452381 97

NODE_6255_length_97_cov_5.261905 97

NODE_6256_length_97_cov_4.952381 97

NODE_6257_length_97_cov_4.928571 97

NODE_6258_length_97_cov_2.523810 97

NODE_6259_length_96_cov_1054.658537 96

NODE_6260_length_96_cov_425.804878 96

NODE_6261_length_96_cov_309.341463 96

NODE_6262_length_96_cov_72.341463 96

NODE_6263_length_96_cov_32.048780 96

NODE_6264_length_96_cov_8.024390 96

NODE_6265_length_96_cov_3.682927 96

NODE_6266_length_96_cov_3.048780 96

NODE_6267_length_96_cov_2.024390 96

NODE_6268_length_95_cov_47.900000 95

NODE_6269_length_95_cov_4.475000 95

NODE_6270_length_94_cov_2461.358974 94

NODE_6271_length_94_cov_41.230769 94

NODE_6272_length_94_cov_25.076923 94

NODE_6273_length_94_cov_12.743590 94

NODE_6274_length_94_cov_7.589744 94

NODE_6275_length_94_cov_6.025641 94

NODE_6276_length_94_cov_5.333333 94

NODE_6277_length_94_cov_3.512821 94

NODE_6278_length_93_cov_462.526316 93

NODE_6279_length_93_cov_146.342105 93

NODE_6280_length_93_cov_90.052632 93

NODE_6281_length_93_cov_80.315789 93

NODE_6282_length_93_cov_38.342105 93

NODE_6283_length_93_cov_11.500000 93

NODE_6284_length_93_cov_3.105263 93

NODE_6285_length_92_cov_281.675676 92

NODE_6286_length_92_cov_250.135135 92

NODE_6287_length_92_cov_220.891892 92

NODE_6288_length_92_cov_214.378378 92

NODE_6289_length_92_cov_129.891892 92

NODE_6290_length_92_cov_96.216216 92

NODE_6291_length_92_cov_83.729730 92

NODE_6292_length_92_cov_63.540541 92

NODE_6293_length_92_cov_57.405405 92

NODE_6294_length_92_cov_37.324324 92

NODE_6295_length_92_cov_6.081081 92

NODE_6296_length_92_cov_4.378378 92

NODE_6297_length_92_cov_3.324324 92

NODE_6298_length_92_cov_3.108108 92

NODE_6299_length_92_cov_2.945946 92

NODE_6300_length_91_cov_78.777778 91

NODE_6301_length_91_cov_20.111111 91

NODE_6302_length_91_cov_13.750000 91

NODE_6303_length_91_cov_7.361111 91

NODE_6304_length_91_cov_5.805556 91

NODE_6305_length_91_cov_3.972222 91

NODE_6306_length_91_cov_2.305556 91

NODE_6307_length_91_cov_1.722222 91

NODE_6308_length_91_cov_1.333333 91

NODE_6309_length_91_cov_1.222222 91

NODE_6310_length_90_cov_386.971429 90

NODE_6311_length_90_cov_103.857143 90

NODE_6312_length_90_cov_101.514286 90

NODE_6313_length_90_cov_97.600000 90

NODE_6314_length_90_cov_31.600000 90

NODE_6315_length_89_cov_73.705882 89

NODE_6316_length_89_cov_3.470588 89

NODE_6317_length_89_cov_2.676471 89

NODE_6318_length_88_cov_3092.454545 88

NODE_6319_length_88_cov_2426.696970 88

NODE_6320_length_88_cov_67.787879 88

NODE_6321_length_88_cov_59.484848 88

NODE_6322_length_88_cov_45.060606 88

NODE_6323_length_88_cov_37.969697 88

NODE_6324_length_87_cov_2776.687500 87

NODE_6325_length_87_cov_301.718750 87

NODE_6326_length_87_cov_190.781250 87

NODE_6327_length_87_cov_5.906250 87

NODE_6328_length_87_cov_5.250000 87

NODE_6329_length_87_cov_4.968750 87

NODE_6330_length_86_cov_87.129032 86

NODE_6331_length_86_cov_74.709677 86

NODE_6332_length_86_cov_3.967742 86

NODE_6333_length_86_cov_3.000000 86

NODE_6334_length_86_cov_1.419355 86

NODE_6335_length_85_cov_2342.733333 85

NODE_6336_length_85_cov_385.900000 85

NODE_6337_length_85_cov_52.666667 85

NODE_6338_length_85_cov_41.266667 85

NODE_6339_length_85_cov_14.400000 85

NODE_6340_length_85_cov_13.933333 85

NODE_6341_length_85_cov_7.633333 85

NODE_6342_length_85_cov_3.166667 85

NODE_6343_length_84_cov_6631.965517 84

NODE_6344_length_84_cov_100.344828 84

NODE_6345_length_84_cov_4.103448 84

NODE_6346_length_83_cov_8162.142857 83

NODE_6347_length_83_cov_2769.071429 83

NODE_6348_length_83_cov_1284.785714 83

NODE_6349_length_83_cov_36.821429 83

NODE_6350_length_83_cov_11.071429 83

NODE_6351_length_82_cov_2797.296296 82

NODE_6352_length_82_cov_210.925926 82

NODE_6353_length_82_cov_79.555556 82

NODE_6354_length_82_cov_40.444444 82

NODE_6355_length_82_cov_28.407407 82

NODE_6356_length_82_cov_20.518519 82

NODE_6357_length_82_cov_9.481481 82

NODE_6358_length_82_cov_9.222222 82

NODE_6359_length_82_cov_7.777778 82

NODE_6360_length_82_cov_7.259259 82

NODE_6361_length_82_cov_6.518519 82

NODE_6362_length_82_cov_3.333333 82

NODE_6363_length_82_cov_1.518519 82

NODE_6364_length_81_cov_3530.730769 81

NODE_6365_length_81_cov_128.423077 81

NODE_6366_length_81_cov_51.423077 81

NODE_6367_length_81_cov_49.576923 81

NODE_6368_length_81_cov_10.500000 81

NODE_6369_length_81_cov_8.730769 81

NODE_6370_length_81_cov_8.730769 81

NODE_6371_length_81_cov_4.384615 81

NODE_6372_length_81_cov_3.269231 81

NODE_6373_length_81_cov_2.846154 81

NODE_6374_length_81_cov_1.846154 81

NODE_6375_length_81_cov_1.730769 81

NODE_6376_length_80_cov_178.000000 80

NODE_6377_length_80_cov_48.480000 80

NODE_6378_length_80_cov_19.120000 80

NODE_6379_length_80_cov_12.120000 80

NODE_6380_length_80_cov_3.280000 80

NODE_6381_length_80_cov_2.160000 80

NODE_6382_length_80_cov_1.760000 80

NODE_6383_length_79_cov_72.208333 79

NODE_6384_length_79_cov_63.125000 79

NODE_6385_length_79_cov_12.041667 79

NODE_6386_length_79_cov_3.250000 79

NODE_6387_length_79_cov_2.916667 79

NODE_6388_length_78_cov_5789.000000 78

NODE_6389_length_78_cov_4230.000000 78

NODE_6390_length_78_cov_987.739130 78

NODE_6391_length_78_cov_620.695652 78

NODE_6392_length_78_cov_149.391304 78

NODE_6393_length_78_cov_44.521739 78

NODE_6394_length_78_cov_24.347826 78

NODE_6395_length_78_cov_24.217391 78

NODE_6396_length_78_cov_17.347826 78

NODE_6397_length_78_cov_11.565217 78

NODE_6398_length_78_cov_3.130435 78

NODE_6399_length_78_cov_2.782609 78

NODE_6400_length_77_cov_134.409091 77

NODE_6401_length_77_cov_107.545455 77

NODE_6402_length_77_cov_3.227273 77

NODE_6403_length_77_cov_1.863636 77

NODE_6404_length_77_cov_1.818182 77

NODE_6405_length_77_cov_1.454545 77

NODE_6406_length_77_cov_1.409091 77

NODE_6407_length_77_cov_1.318182 77

NODE_6408_length_77_cov_1.272727 77

NODE_6409_length_77_cov_1.045455 77

NODE_6410_length_77_cov_1.000000 77

NODE_6411_length_76_cov_762.238095 76

NODE_6412_length_76_cov_194.714286 76

NODE_6413_length_76_cov_167.523810 76

NODE_6414_length_76_cov_81.952381 76

NODE_6415_length_76_cov_76.857143 76

NODE_6416_length_76_cov_57.523810 76

NODE_6417_length_76_cov_50.857143 76

NODE_6418_length_76_cov_21.047619 76

NODE_6419_length_75_cov_4260.550000 75

NODE_6420_length_75_cov_3070.550000 75

NODE_6421_length_75_cov_381.050000 75

NODE_6422_length_75_cov_45.550000 75

NODE_6423_length_75_cov_38.750000 75

NODE_6424_length_75_cov_10.150000 75

NODE_6425_length_75_cov_4.200000 75

NODE_6426_length_75_cov_3.600000 75

NODE_6427_length_75_cov_2.650000 75

NODE_6428_length_75_cov_1.200000 75

NODE_6429_length_74_cov_1878.736842 74

NODE_6430_length_74_cov_246.789474 74

NODE_6431_length_74_cov_101.473684 74

NODE_6432_length_74_cov_63.052632 74

NODE_6433_length_74_cov_43.000000 74

NODE_6434_length_74_cov_38.315789 74

NODE_6435_length_74_cov_25.684211 74

NODE_6436_length_74_cov_9.473684 74

NODE_6437_length_74_cov_4.736842 74

NODE_6438_length_74_cov_4.473684 74

NODE_6439_length_74_cov_2.631579 74

NODE_6440_length_73_cov_3786.000000 73

NODE_6441_length_73_cov_152.500000 73

NODE_6442_length_73_cov_143.277778 73

NODE_6443_length_73_cov_129.000000 73

NODE_6444_length_73_cov_72.055556 73

NODE_6445_length_73_cov_68.166667 73

NODE_6446_length_73_cov_14.666667 73

NODE_6447_length_73_cov_12.111111 73

NODE_6448_length_73_cov_11.388889 73

NODE_6449_length_73_cov_4.666667 73

NODE_6450_length_73_cov_3.611111 73

NODE_6451_length_73_cov_3.555556 73

NODE_6452_length_72_cov_3011.294118 72

NODE_6453_length_72_cov_2086.941176 72

NODE_6454_length_72_cov_217.000000 72

NODE_6455_length_72_cov_114.235294 72

NODE_6456_length_72_cov_93.117647 72

NODE_6457_length_72_cov_90.705882 72

NODE_6458_length_72_cov_44.411765 72

NODE_6459_length_72_cov_42.764706 72

NODE_6460_length_72_cov_30.176471 72

NODE_6461_length_72_cov_23.176471 72

NODE_6462_length_72_cov_22.764706 72

NODE_6463_length_72_cov_12.235294 72

NODE_6464_length_72_cov_8.823529 72

NODE_6465_length_72_cov_2.823529 72

NODE_6466_length_71_cov_92.625000 71

NODE_6467_length_71_cov_14.187500 71

NODE_6468_length_71_cov_7.750000 71

NODE_6469_length_71_cov_3.000000 71

NODE_6470_length_70_cov_2088.066667 70

NODE_6471_length_70_cov_127.600000 70

NODE_6472_length_70_cov_89.066667 70

NODE_6473_length_70_cov_47.800000 70

NODE_6474_length_70_cov_35.666667 70

NODE_6475_length_70_cov_35.333333 70

NODE_6476_length_70_cov_4.266667 70

NODE_6477_length_70_cov_3.333333 70

NODE_6478_length_70_cov_3.000000 70

NODE_6479_length_70_cov_3.000000 70

NODE_6480_length_70_cov_2.666667 70

NODE_6481_length_70_cov_1.333333 70

NODE_6482_length_70_cov_1.200000 70

NODE_6483_length_69_cov_167.714286 69

NODE_6484_length_69_cov_92.000000 69

NODE_6485_length_69_cov_43.142857 69

NODE_6486_length_69_cov_27.571429 69

NODE_6487_length_69_cov_25.642857 69

NODE_6488_length_69_cov_13.714286 69

NODE_6489_length_69_cov_11.285714 69

NODE_6490_length_69_cov_7.285714 69

NODE_6491_length_69_cov_6.214286 69

NODE_6492_length_69_cov_5.785714 69

NODE_6493_length_69_cov_4.857143 69

NODE_6494_length_69_cov_4.714286 69

NODE_6495_length_69_cov_3.000000 69

NODE_6496_length_69_cov_2.857143 69

NODE_6497_length_69_cov_1.500000 69

NODE_6498_length_68_cov_277.307692 68

NODE_6499_length_68_cov_146.384615 68

NODE_6500_length_68_cov_86.692308 68

NODE_6501_length_68_cov_66.461538 68

NODE_6502_length_68_cov_48.538462 68

NODE_6503_length_68_cov_31.692308 68

NODE_6504_length_68_cov_13.923077 68

NODE_6505_length_68_cov_13.153846 68

NODE_6506_length_68_cov_11.384615 68

NODE_6507_length_68_cov_8.461538 68

NODE_6508_length_68_cov_5.153846 68

NODE_6509_length_68_cov_3.769231 68

NODE_6510_length_68_cov_2.692308 68

NODE_6511_length_67_cov_2693.000000 67

NODE_6512_length_67_cov_258.166667 67

NODE_6513_length_67_cov_184.500000 67

NODE_6514_length_67_cov_184.083333 67

NODE_6515_length_67_cov_103.166667 67

NODE_6516_length_67_cov_86.666667 67

NODE_6517_length_67_cov_71.666667 67

NODE_6518_length_67_cov_30.083333 67

NODE_6519_length_67_cov_19.750000 67

NODE_6520_length_67_cov_19.750000 67

NODE_6521_length_67_cov_18.000000 67

NODE_6522_length_67_cov_12.750000 67

NODE_6523_length_67_cov_12.666667 67

NODE_6524_length_67_cov_4.333333 67

NODE_6525_length_67_cov_2.666667 67

NODE_6526_length_67_cov_2.666667 67

NODE_6527_length_67_cov_2.583333 67

NODE_6528_length_66_cov_172.636364 66

NODE_6529_length_66_cov_58.545455 66

NODE_6530_length_66_cov_42.545455 66

NODE_6531_length_66_cov_16.545455 66

NODE_6532_length_66_cov_9.181818 66

NODE_6533_length_66_cov_5.545455 66

NODE_6534_length_66_cov_5.181818 66

NODE_6535_length_66_cov_4.909091 66

NODE_6536_length_66_cov_4.727273 66

NODE_6537_length_66_cov_4.181818 66

NODE_6538_length_66_cov_2.636364 66

NODE_6539_length_65_cov_188.800000 65

NODE_6540_length_65_cov_13.100000 65

NODE_6541_length_65_cov_5.200000 65

NODE_6542_length_65_cov_5.200000 65

NODE_6543_length_65_cov_4.200000 65

NODE_6544_length_65_cov_3.500000 65

NODE_6545_length_64_cov_2129.555556 64

NODE_6546_length_64_cov_371.888889 64

NODE_6547_length_64_cov_128.666667 64

NODE_6548_length_64_cov_101.777778 64

NODE_6549_length_64_cov_52.444444 64

NODE_6550_length_64_cov_51.333333 64

NODE_6551_length_64_cov_39.111111 64

NODE_6552_length_64_cov_30.222222 64

NODE_6553_length_64_cov_24.444444 64

NODE_6554_length_64_cov_15.333333 64

NODE_6555_length_64_cov_9.777778 64

NODE_6556_length_64_cov_9.555556 64

NODE_6557_length_64_cov_9.000000 64

NODE_6558_length_64_cov_4.000000 64

NODE_6559_length_64_cov_3.333333 64

NODE_6560_length_64_cov_2.444444 64

NODE_6561_length_63_cov_8218.250000 63

NODE_6562_length_63_cov_545.500000 63

NODE_6563_length_63_cov_248.000000 63

NODE_6564_length_63_cov_121.500000 63

NODE_6565_length_63_cov_114.250000 63

NODE_6566_length_63_cov_36.250000 63

NODE_6567_length_63_cov_31.500000 63

NODE_6568_length_63_cov_20.750000 63

NODE_6569_length_63_cov_20.750000 63

NODE_6570_length_63_cov_11.875000 63

NODE_6571_length_63_cov_5.625000 63

NODE_6572_length_63_cov_2.125000 63

NODE_6573_length_63_cov_2.125000 63

NODE_6574_length_62_cov_6809.571429 62

NODE_6575_length_62_cov_1844.857143 62

NODE_6576_length_62_cov_122.142857 62

NODE_6577_length_62_cov_119.571429 62

NODE_6578_length_62_cov_94.857143 62

NODE_6579_length_62_cov_92.142857 62

NODE_6580_length_62_cov_32.714286 62

NODE_6581_length_62_cov_13.142857 62

NODE_6582_length_62_cov_9.857143 62

NODE_6583_length_62_cov_8.428571 62

NODE_6584_length_62_cov_8.000000 62

NODE_6585_length_62_cov_7.428571 62

NODE_6586_length_62_cov_5.857143 62

NODE_6587_length_62_cov_5.428571 62

NODE_6588_length_62_cov_4.571429 62

NODE_6589_length_62_cov_4.000000 62

NODE_6590_length_62_cov_1.571429 62

NODE_6591_length_61_cov_2052.000000 61

NODE_6592_length_61_cov_775.666667 61

NODE_6593_length_61_cov_280.000000 61

NODE_6594_length_61_cov_81.833333 61

NODE_6595_length_61_cov_61.000000 61

NODE_6596_length_61_cov_56.833333 61

NODE_6597_length_61_cov_39.333333 61

NODE_6598_length_61_cov_35.166667 61

NODE_6599_length_61_cov_9.500000 61

NODE_6600_length_61_cov_9.500000 61

NODE_6601_length_61_cov_8.166667 61

NODE_6602_length_61_cov_7.666667 61

NODE_6603_length_61_cov_7.500000 61

NODE_6604_length_61_cov_7.333333 61

NODE_6605_length_61_cov_6.500000 61

NODE_6606_length_61_cov_6.500000 61

NODE_6607_length_61_cov_5.500000 61

NODE_6608_length_61_cov_5.000000 61

NODE_6609_length_61_cov_4.333333 61

NODE_6610_length_61_cov_3.333333 61

NODE_6611_length_61_cov_3.333333 61

NODE_6612_length_61_cov_3.000000 61

NODE_6613_length_61_cov_2.666667 61

NODE_6614_length_61_cov_1.500000 61

NODE_6615_length_60_cov_187.600000 60

NODE_6616_length_60_cov_152.400000 60

NODE_6617_length_60_cov_83.600000 60

NODE_6618_length_60_cov_75.400000 60

NODE_6619_length_60_cov_69.800000 60

NODE_6620_length_60_cov_62.200000 60

NODE_6621_length_60_cov_38.400000 60

NODE_6622_length_60_cov_23.000000 60

NODE_6623_length_60_cov_21.800000 60

NODE_6624_length_60_cov_19.000000 60

NODE_6625_length_60_cov_16.200000 60

NODE_6626_length_60_cov_12.600000 60

NODE_6627_length_60_cov_11.200000 60

NODE_6628_length_60_cov_11.000000 60

NODE_6629_length_60_cov_8.400000 60

NODE_6630_length_60_cov_7.600000 60

NODE_6631_length_60_cov_6.000000 60

NODE_6632_length_60_cov_4.400000 60

NODE_6633_length_60_cov_4.000000 60

NODE_6634_length_60_cov_3.400000 60

NODE_6635_length_59_cov_7039.500000 59

NODE_6636_length_59_cov_2653.750000 59

NODE_6637_length_59_cov_1801.000000 59

NODE_6638_length_59_cov_812.500000 59

NODE_6639_length_59_cov_231.250000 59

NODE_6640_length_59_cov_86.500000 59

NODE_6641_length_59_cov_61.500000 59

NODE_6642_length_59_cov_24.750000 59

NODE_6643_length_59_cov_17.000000 59

NODE_6644_length_59_cov_12.500000 59

NODE_6645_length_59_cov_10.250000 59

NODE_6646_length_59_cov_10.000000 59

NODE_6647_length_59_cov_8.750000 59

NODE_6648_length_59_cov_8.250000 59

NODE_6649_length_59_cov_6.000000 59

NODE_6650_length_59_cov_5.750000 59

NODE_6651_length_59_cov_5.000000 59

NODE_6652_length_59_cov_3.750000 59

NODE_6653_length_59_cov_3.500000 59

NODE_6654_length_58_cov_2251.000000 58

NODE_6655_length_58_cov_416.000000 58

NODE_6656_length_58_cov_133.666667 58

NODE_6657_length_58_cov_91.000000 58

NODE_6658_length_58_cov_84.333333 58

NODE_6659_length_58_cov_79.000000 58

NODE_6660_length_58_cov_60.333333 58

NODE_6661_length_58_cov_56.666667 58

NODE_6662_length_58_cov_47.666667 58

NODE_6663_length_58_cov_43.666667 58

NODE_6664_length_58_cov_37.333333 58

NODE_6665_length_58_cov_31.000000 58

NODE_6666_length_58_cov_27.666667 58

NODE_6667_length_58_cov_21.666667 58

NODE_6668_length_58_cov_18.000000 58

NODE_6669_length_58_cov_17.000000 58

NODE_6670_length_58_cov_15.333333 58

NODE_6671_length_58_cov_13.666667 58

NODE_6672_length_58_cov_12.666667 58

NODE_6673_length_58_cov_4.666667 58

NODE_6674_length_58_cov_4.000000 58

NODE_6675_length_58_cov_3.666667 58

NODE_6676_length_58_cov_3.000000 58

NODE_6677_length_58_cov_3.000000 58

NODE_6678_length_58_cov_1.666667 58

NODE_6679_length_57_cov_2096.500000 57

NODE_6680_length_57_cov_1964.500000 57

NODE_6681_length_57_cov_1915.500000 57

NODE_6682_length_57_cov_1495.000000 57

NODE_6683_length_57_cov_547.000000 57

NODE_6684_length_57_cov_474.000000 57

NODE_6685_length_57_cov_394.500000 57

NODE_6686_length_57_cov_286.000000 57

NODE_6687_length_57_cov_286.000000 57

NODE_6688_length_57_cov_278.500000 57

NODE_6689_length_57_cov_201.500000 57

NODE_6690_length_57_cov_167.500000 57

NODE_6691_length_57_cov_148.500000 57

NODE_6692_length_57_cov_96.500000 57

NODE_6693_length_57_cov_95.000000 57

NODE_6694_length_57_cov_93.000000 57

NODE_6695_length_57_cov_90.500000 57

NODE_6696_length_57_cov_77.500000 57

NODE_6697_length_57_cov_66.500000 57

NODE_6698_length_57_cov_65.500000 57

NODE_6699_length_57_cov_60.000000 57

NODE_6700_length_57_cov_56.000000 57

NODE_6701_length_57_cov_54.000000 57

NODE_6702_length_57_cov_52.500000 57

NODE_6703_length_57_cov_50.000000 57

NODE_6704_length_57_cov_49.500000 57

NODE_6705_length_57_cov_47.500000 57

NODE_6706_length_57_cov_46.000000 57

NODE_6707_length_57_cov_24.000000 57

NODE_6708_length_57_cov_22.000000 57

NODE_6709_length_57_cov_21.000000 57

NODE_6710_length_57_cov_20.000000 57

NODE_6711_length_57_cov_19.500000 57

NODE_6712_length_57_cov_19.500000 57

NODE_6713_length_57_cov_17.500000 57

NODE_6714_length_57_cov_17.000000 57

NODE_6715_length_57_cov_17.000000 57

NODE_6716_length_57_cov_16.500000 57

NODE_6717_length_57_cov_14.500000 57

NODE_6718_length_57_cov_14.500000 57

NODE_6719_length_57_cov_12.000000 57

NODE_6720_length_57_cov_9.500000 57

NODE_6721_length_57_cov_8.500000 57

NODE_6722_length_57_cov_7.000000 57

NODE_6723_length_57_cov_7.000000 57

NODE_6724_length_57_cov_5.500000 57

NODE_6725_length_56_cov_7369.000000 56

NODE_6726_length_56_cov_4949.000000 56

NODE_6727_length_56_cov_3012.000000 56

NODE_6728_length_56_cov_1950.000000 56

NODE_6729_length_56_cov_1941.000000 56

NODE_6730_length_56_cov_1923.000000 56

NODE_6731_length_56_cov_1838.000000 56

NODE_6732_length_56_cov_1659.000000 56

NODE_6733_length_56_cov_1620.000000 56

NODE_6734_length_56_cov_1311.000000 56

NODE_6735_length_56_cov_603.000000 56

NODE_6736_length_56_cov_353.000000 56

NODE_6737_length_56_cov_339.000000 56

NODE_6738_length_56_cov_329.000000 56

NODE_6739_length_56_cov_299.000000 56

NODE_6740_length_56_cov_266.000000 56

NODE_6741_length_56_cov_221.000000 56

NODE_6742_length_56_cov_181.000000 56

NODE_6743_length_56_cov_177.000000 56

NODE_6744_length_56_cov_143.000000 56

NODE_6745_length_56_cov_142.000000 56

NODE_6746_length_56_cov_136.000000 56

NODE_6747_length_56_cov_121.000000 56

NODE_6748_length_56_cov_118.000000 56

NODE_6749_length_56_cov_114.000000 56

NODE_6750_length_56_cov_113.000000 56

NODE_6751_length_56_cov_104.000000 56

NODE_6752_length_56_cov_102.000000 56

NODE_6753_length_56_cov_94.000000 56

NODE_6754_length_56_cov_89.000000 56

NODE_6755_length_56_cov_87.000000 56

NODE_6756_length_56_cov_85.000000 56

NODE_6757_length_56_cov_82.000000 56

NODE_6758_length_56_cov_78.000000 56

NODE_6759_length_56_cov_76.000000 56

NODE_6760_length_56_cov_73.000000 56

NODE_6761_length_56_cov_71.000000 56

NODE_6762_length_56_cov_67.000000 56

NODE_6763_length_56_cov_65.000000 56

NODE_6764_length_56_cov_63.000000 56

NODE_6765_length_56_cov_60.000000 56

NODE_6766_length_56_cov_60.000000 56

NODE_6767_length_56_cov_58.000000 56

NODE_6768_length_56_cov_57.000000 56

NODE_6769_length_56_cov_54.000000 56

NODE_6770_length_56_cov_52.000000 56

NODE_6771_length_56_cov_51.000000 56

NODE_6772_length_56_cov_49.000000 56

NODE_6773_length_56_cov_48.000000 56

NODE_6774_length_56_cov_48.000000 56

NODE_6775_length_56_cov_46.000000 56

NODE_6776_length_56_cov_46.000000 56

NODE_6777_length_56_cov_46.000000 56

NODE_6778_length_56_cov_46.000000 56

NODE_6779_length_56_cov_45.000000 56

NODE_6780_length_56_cov_44.000000 56

NODE_6781_length_56_cov_43.000000 56

NODE_6782_length_56_cov_40.000000 56

NODE_6783_length_56_cov_39.000000 56

NODE_6784_length_56_cov_37.000000 56

NODE_6785_length_56_cov_36.000000 56

NODE_6786_length_56_cov_33.000000 56

NODE_6787_length_56_cov_32.000000 56

NODE_6788_length_56_cov_32.000000 56

NODE_6789_length_56_cov_31.000000 56

NODE_6790_length_56_cov_29.000000 56

NODE_6791_length_56_cov_29.000000 56

NODE_6792_length_56_cov_27.000000 56

NODE_6793_length_56_cov_27.000000 56

NODE_6794_length_56_cov_25.000000 56

NODE_6795_length_56_cov_25.000000 56

NODE_6796_length_56_cov_25.000000 56

NODE_6797_length_56_cov_24.000000 56

NODE_6798_length_56_cov_24.000000 56

NODE_6799_length_56_cov_23.000000 56

NODE_6800_length_56_cov_23.000000 56

NODE_6801_length_56_cov_23.000000 56

NODE_6802_length_56_cov_23.000000 56

NODE_6803_length_56_cov_23.000000 56

NODE_6804_length_56_cov_22.000000 56

NODE_6805_length_56_cov_22.000000 56

NODE_6806_length_56_cov_21.000000 56

NODE_6807_length_56_cov_21.000000 56

NODE_6808_length_56_cov_21.000000 56

NODE_6809_length_56_cov_20.000000 56

NODE_6810_length_56_cov_20.000000 56

NODE_6811_length_56_cov_20.000000 56

NODE_6812_length_56_cov_19.000000 56

NODE_6813_length_56_cov_17.000000 56

NODE_6814_length_56_cov_17.000000 56

NODE_6815_length_56_cov_16.000000 56

NODE_6816_length_56_cov_16.000000 56

NODE_6817_length_56_cov_16.000000 56

NODE_6818_length_56_cov_15.000000 56

NODE_6819_length_56_cov_15.000000 56

NODE_6820_length_56_cov_15.000000 56

NODE_6821_length_56_cov_14.000000 56

NODE_6822_length_56_cov_13.000000 56

NODE_6823_length_56_cov_13.000000 56

NODE_6824_length_56_cov_12.000000 56

NODE_6825_length_56_cov_12.000000 56

NODE_6826_length_56_cov_12.000000 56

NODE_6827_length_56_cov_11.000000 56

NODE_6828_length_56_cov_10.000000 56

NODE_6829_length_56_cov_9.000000 56

NODE_6830_length_56_cov_8.000000 56

NODE_6831_length_56_cov_8.000000 56

NODE_6832_length_56_cov_7.000000 56

NODE_6833_length_56_cov_7.000000 56

NODE_6834_length_56_cov_7.000000 56

NODE_6835_length_56_cov_6.000000 56

NODE_6836_length_56_cov_6.000000 56

NODE_6837_length_56_cov_4.000000 57
