# Supplementary material for: Unveiling the Brazilian Kefir Microbiome: Discovery of a novel Lactobacillus kefiranofaciens (LkefirU) genome and in silico prospection of bioactive peptides with potential anti-Alzheimer properties
Source: Research Square preprint supplement (doi:10.21203/rs.3.rs-4014898/v1), 2024-04-11
Supplement: Supplementary file 2 [file 4eaa261a539fdb0ac4ff6048.xlsx]

## Sheet: Planilha1
Supplementary material- Table 2- Peptides of LkefirU- This table list all peptides of LkefirU found on our analysis. Also, the table show the prediction of toxicity, bioactive, and capacity of pass the blood-brain barrier.
Peptides	Toxicity	Bioactivity	Probability BBP
ILDKFNQNILLVICCIFIFLGG	Toxin	0.986446	0.096349
NWGFPK	Non-Toxin	0.944854	0.590628
VPGYPFLP	Non-Toxin	0.91422	0.794003
GLPIVMNPML	Non-Toxin	0.860057	0.122191
EPADLLGWR	Non-Toxin	0.85261	0.097877
VPGYPFLPI	Non-Toxin	0.849297	0.831898
SVPEKIMSAVFALSIVLWVL	Non-Toxin	0.841312	0.240357
IGWYGFNA	Non-Toxin	0.817716	0.595438
KSPCVFILDQKKRL	Non-Toxin	0.814756	0.868010
INPVYIKGKDLFDTLMLNL	Non-Toxin	0.763936	0.156819
LHPLLP	Non-Toxin	0.750693	0.867937
ITSMIIIDVVLTIAGNIGIET	Non-Toxin	0.680031	0.168710
MMIPK	Non-Toxin	0.669664	0.349638
TAWQMLIPLKMEKWVLV	Non-Toxin	0.669421	0.464638
HIVDLFPHAKFVLD	Non-Toxin	0.633726	0.814698
AGMLRNP	Non-Toxin	0.601413	0.386717
PHLLIP	Non-Toxin	0.584755	0.554614
LEDKYVKLRPML	Non-Toxin	0.578362	0.225279
NIDDKKTSKYLFKSIIPF	Non-Toxin	0.568626	0.148970
LASYLMSSLISMH	Non-Toxin	0.534475	0.402244
GKSFDTSMGFSPI	Non-Toxin	0.533435	0.196715
SAEPVGLALRYAGHPI	Non-Toxin	0.503568	0.508938
ILEQQYLMPISTKRLFLN	Non-Toxin	0.486286	0.173819
AMLDKP	Non-Toxin	0.480173	0.246712
LPNDIP	Non-Toxin	0.479847	0.807810
LPLSDNTMIP	Non-Toxin	0.472613	0.682666
GASKGNALMNLASRLKIAQK	Non-Toxin	0.471761	0.137383
PLYRYLGGCDLEL	Non-Toxin	0.416469	0.173524
PTRKNKPASKPAKGGN	Non-Toxin	0.412399	0.287543
LPNEVDLSTKLADNIKLNIP	Non-Toxin	0.402924	0.513082
PTDIKMSPLP	Non-Toxin	0.375099	0.136424
EGAEDDPELAAKDLKNLNLTEKDTVL	Non-Toxin	0.369128	0.134624
LPLVAAAFTKAAAAKMSA	Non-Toxin	0.364752	0.342464
VLTEVNALPGFTNISMYPKL	Non-Toxin	0.35307	0.299207
LTPGSVVQQAGSKALVVYLIAA	Non-Toxin	0.332209	0.223567
INNISPLILN	Non-Toxin	0.332117	0.274458
SAPIEAPKAPV	Non-Toxin	0.322426	0.275606
ILDAPVSGGDI	Non-Toxin	0.321316	0.098516
ALTNDQAVLLDLSHGLQKHL	Non-Toxin	0.3208	0.320604
TGGYQKMLK	Non-Toxin	0.316455	0.755383
DGKEADTFYTVK	Non-Toxin	0.31328	0.383321
VYLSENGLMP	Non-Toxin	0.30028	0.765420
NPDVTIP	Non-Toxin	0.281617	0.229124
KEKSVKGVYAAKGRP	Non-Toxin	0.273266	0.848615
ARPEIEKKM	Non-Toxin	0.271392	0.218563
VNIYDNQGR	Non-Toxin	0.268309	0.636578
ASDLAAYITNKKAQLIAHKE	Non-Toxin	0.263238	0.189690
QAPKEPIDK	Non-Toxin	0.257104	0.308988
LIAPKDTKTFRKSI	Non-Toxin	0.25613	0.327596
VSRQDDQPMLLQP	Non-Toxin	0.25407	0.591354
TGFKLHVKGVSL	Non-Toxin	0.253172	0.597139
SNAIRGLRHT	Non-Toxin	0.25187	0.768537
ARLIAVYVPIYLNN	Non-Toxin	0.238117	0.204601
KKAVNLVSGLY	Non-Toxin	0.219809	0.837775
VQRMLASEGLIDSQHLRTGQ	Non-Toxin	0.211727	0.730980
FDLMLGAINE	Non-Toxin	0.211441	0.312548
SQVVYPTGSLQKVV	Non-Toxin	0.210612	0.574354
DVVKKMFSTP	Non-Toxin	0.202091	0.298177
TAIQAAIDTGRKVAIFGRSMENGVDNGIDL	Non-Toxin	0.185149	0.282182
VNWNSSKVK	Non-Toxin	0.181146	0.623414
DQTPAGNLVS	Non-Toxin	0.179657	0.490561
TDIQPDKYKVYV	Non-Toxin	0.178598	0.553257
LFYLITLVERHGIEILD	Non-Toxin	0.178385	0.557568
AAAGAKDAEINN	Non-Toxin	0.177283	0.092979
VEPVVESGF	Non-Toxin	0.176909	0.616707
LRIDHHNP	Non-Toxin	0.176735	0.900832
KGRQLNVVINP	Non-Toxin	0.173292	0.663678
AVGNIGVPISEVVPKAT	Non-Toxin	0.170575	0.087178
GNVLAENNNPGTH	Non-Toxin	0.169308	0.230179
GNVTIIGGVHI	Non-Toxin	0.164502	0.139590
MLISTVALMTVVPMI	Non-Toxin	0.16019	0.153524
LIAKPSSLVEYLAKNGQILLDDLP	Non-Toxin	0.152522	0.321504
INTMFSSQ	Non-Toxin	0.151756	0.448782
VPNNGNKVT	Non-Toxin	0.140671	0.798034
LSRTMTAGQMEMI	Non-Toxin	0.138711	0.203774
KVVVLEKFPQ	Non-Toxin	0.131212	0.662366
IIGNGVVINPEV	Non-Toxin	0.126125	0.076127
KQMTDDREHLT	Non-Toxin	0.125123	0.813716
KNIVNSVDNEDF	Non-Toxin	0.121071	0.596268
LTGLGSKYQI	Non-Toxin	0.12009	0.226152
ARILNVPFAIADATTLTEAGY	Non-Toxin	0.108435	0.349848
LVEIPN	Non-Toxin	0.106429	0.289128
IQDVVQYIIVAIKET	Non-Toxin	0.10609	0.149951
ERGGKEL	Non-Toxin	0.103755	0.414480
TDAITVAFNSI	Non-Toxin	0.100165	0.292675
QTKLAKEGIH	Non-Toxin	0.0879093	0.447922
KDRSTIILNDSITIEKIPE	Non-Toxin	0.084919	0.602711
ILRLDLQNEPQTQARFQREALA	Non-Toxin	0.0760991	0.196199
TLLTKNIY	Non-Toxin	0.0734316	0.710520
EEIREL	Non-Toxin	0.0697343	0.258855
IVVHETDD	Non-Toxin	0.0324363	0.427600
