# Supplementary material for: Unveiling the Brazilian Kefir Microbiome: Discovery of a novel Lactobacillus kefiranofaciens (LkefirU) genome and in silico prospection of bioactive peptides with potential anti-Alzheimer properties
Source: Research Square preprint supplement (doi:10.21203/rs.3.rs-4014898/v1), 2024-04-11
Supplement: Supplementary file 3 [file d8c04ad7b47d8a5ba3840688.xlsx]

## Sheet: Planilha1
Supplementary material- Table 3- Molecular Docking- This table shows the interaction of selected peptides from LkefirU and target for Alzheimer diseases and specific aminoacids residues that interact with each target.
Peptide		Target
	AA residues of peptide	β-amyloid Monomer	β-amyloid plate	AChE	BACE1
KSPCVFILDQKKRL	Lys1	-	-	His447, Glu202, Tyr133, and Gli120	Gln12
	Ser2	-	L-Lys16	-	-
	Pro3	Tyr10		Tyr124	Gln12
	Cys4	-	-	-	Glu310 and Ser10
	Val5	Tyr10 and Arg5	-	-	-
	Phe6	Glu22	-	Asp74 and Tyr72	-
	Leu8	Glu22 and Asp23	-	-	-
	Asp9	-	-	Glu292	-
	Gln10	Arg5	-	Glu292	-
	Lys11	Glu11	-	Thr75	Leu306 and Gln303
	Lys12	Asp23	-	-	-
	Arg13	Asp1	I-Ile32	-	Asp318
	Leu14	-	-	-	Trp277
VPGYPFLPI	Val1	Val1	E-Leu34	-	Thr72
	Gly3	Gln15	D-Leu34	Ser125	Thr231 and Arg235
	Tyr4	Glu11 and Gln15	E-Leu17, E-His14, D-Leu34, and D-His14	Gly82, Tyr124, and Ser125	Thr72, Asn233, and Lys321
	Pro5	-	D-Gly33	Tyr124	-
	Phe6	--	E-Ile32, E-Gly33, F-Leu34, and F-Leu17	Phe295	-
	Leu7	-	-	Tyr124	-
	Ile9	Phe20 and Glu22	-	Trp286	Gly74
